# Supplementary material for: Identification of the hub genes in gastric cancer through weighted gene co-expression network analysis
Source: PeerJ. 2021 Mar 5;9:e10682. doi: 10.7717/peerj.10682 (PMC7938783; doi:10.7717/peerj.10682)
Supplement: Table S1 [file peerj-09-10682-s002.xls]

## Sheet: blue GO BP
Category	Term	Count	%	PValue	Genes	List Total	Pop Hits	Pop Total	Fold Enrichment	Bonferroni	Benjamini	FDR
GOTERM_BP_DIRECT	GO:0051301~cell division	94	6.40763	2.28955e-29	MAD1L1, KIFC1, BORA, KNTC1, AURKA, PTTG1, CCNE2, KIF2C, CCNE1, CDCA8, CDCA7, RAD21, OIP5, SEH1L, MIS18A, CDCA2, CABLES2, MASTL, CCNA2, CDCA5, CDCA3, KIF2A, KIF14, CDC7, CDK1, CDC6, KIF11, DSN1, LIG1, CCNF, TPX2, CDK6, CDK7, UBE2C, TACC3, CDK4, CDK5, MCM5, NCAPD3, WEE1, RBBP8, NCAPD2, DCLRE1A, MAD2L1, RCC2, SPAG5, ZWINT, BUB1B, RUVBL1, CHFR, MAD2L2, UBE2S, CKS1B, HAUS6, ASUN, NEK3, NEK2, HAUS1, TI…	1217	350	16792	3.70571	9.05516e-26	9.05516e-26	4.24958e-26
GOTERM_BP_DIRECT	GO:0000082~G1/S transition of mitotic cell cycle	42	2.86299	6.32212e-21	DBF4, POLA1, MCM10, RCC1, TRIM71, RPA4, PPAT, RPA3, CDT1, PRIM1, CCNE2, CCNE1, TYMS, CDC45, EIF4EBP1, MCM7, CDKN2A, POLE2, PRIM2, FBXO5, ORC6, ORC1, CDCA5, CDC7, CDK1, CDC6, SKP2, CDK6, MCM2, CDK7, MCM3, CDK4, CDKN3, MCM4, MCM5, CDC25A, RBBP8, MCM6, DHFR, RRM2, PCNA, ID4	1217	102	16792	5.68147	2.5004e-17	1.2502e-17	1.17344e-17
GOTERM_BP_DIRECT	GO:0007067~mitotic nuclear division	64	4.36264	3.48856e-19	BORA, KNTC1, AURKA, PTTG1, AURKB, KIF2C, RAD21, OIP5, MIS18A, CDCA2, MASTL, CDCA5, CCNA2, ASPM, CDCA3, CDK1, CDC6, KIF11, KIF15, CCNF, TPX2, PBK, WEE1, RBBP8, DCLRE1A, RCC2, BUB1B, RUVBL1, CHFR, MAD2L2, HAUS6, ASUN, NEK3, NEK2, HAUS1, TIPIN, ANLN, CEP55, RCC1, CCNG1, SPC25, VRK1, SAC3D1, NCAPG2, SKA3, FBXO5, SKA1, ZWILCH, NSUN2, HELLS, ERCC6L, CENPN, YEATS4, NUF2, CENPF, NDC80, BIRC5, CDC20, CDC2…	1217	248	16792	3.56074	1.37972e-15	4.59908e-16	6.47503e-16
GOTERM_BP_DIRECT	GO:0007062~sister chromatid cohesion	38	2.59032	4.1324e-17	MAD1L1, KNTC1, AURKB, SPC25, KIF2C, CDCA8, RAD21, SEH1L, CENPA, SKA1, ZWILCH, CDCA5, KIF2A, ERCC6L, CENPO, ESCO1, CENPN, CENPM, CENPL, DSN1, CENPQ, KIF18A, NUF2, CENPF, NUP85, SPDL1, NDC80, CENPE, BIRC5, CDC20, CENPK, CENPH, MAD2L1, RCC2, ZWINT, BUB1B, CENPU, NUP107	1217	103	16792	5.09047	1.63436e-13	4.08591e-14	7.67006e-14
GOTERM_BP_DIRECT	GO:0006260~DNA replication	43	2.93115	3.35516e-14	BLM, DBF4, TIPIN, POLA1, CHEK1, MCM10, RPA3, CDT1, CDC45, MCM7, POLE2, POLE3, ORC6, RHNO1, ORC1, FEN1, EXO1, CDC7, CDK1, CDC6, DTL, GINS3, LIG1, BRIP1, RMI2, MCM2, RNASEH2A, MCM3, MCM4, C10ORF2, MCM5, CDC25A, RBBP8, MCM6, DNA2, RFC3, RFC4, RFC2, RRM2, POLD1, RRM1, PCNA, BARD1	1217	155	16792	3.82779	1.32606e-10	2.65212e-11	6.2228e-11
GOTERM_BP_DIRECT	GO:0006270~DNA replication initiation	19	1.29516	4.71906e-13	CDC7, CDC6, POLA1, MCM2, MCM10, MCM3, MCM4, MCM5, RPA4, MCM6, PRIM1, CCNE2, CCNE1, CDC45, MCM7, POLE2, PRIM2, ORC6, ORC1	1217	32	16792	8.19248	1.86659e-09	3.11097e-10	8.75988e-10
GOTERM_BP_DIRECT	GO:0007059~chromosome segregation	22	1.49966	6.69684e-09	CENPN, KIF11, NEK3, NEK2, DSN1, NUF2, CENPF, NDC80, CENPE, RCC1, KNSTRN, SPC25, OIP5, SPAG5, HJURP, MIS18A, DDX3Y, CDCA2, CENPW, SKA3, SKA1, TOP2A	1217	68	16792	4.46401	2.64856e-05	3.78371e-06	1.24298e-05
GOTERM_BP_DIRECT	GO:0000722~telomere maintenance via recombination	15	1.02249	1.38393e-08	LIG1, POLA1, BRCA2, RAD51, RPA3, PRIM1, DNA2, RFC3, RFC4, POLE2, RFC2, POLD1, PRIM2, PCNA, FEN1	1217	32	16792	6.46775	5.47331e-05	6.8418e-06	2.56869e-05
GOTERM_BP_DIRECT	GO:0000070~mitotic sister chromatid segregation	13	0.886162	4.22748e-08	KIFC1, NEK2, DSN1, NUSAP1, KIF18B, ESPL1, NDC80, KNSTRN, SMC4, MAD2L1, CENPA, SPAG5, ZWINT	1217	25	16792	7.17489	0.000167183	1.85773e-05	7.84654e-05
GOTERM_BP_DIRECT	GO:0000086~G2/M transition of mitotic cell cycle	30	2.04499	1.29604e-07	CEP72, HAUS6, CEP76, NEK2, FOXM1, BORA, HAUS1, AURKA, CHEK1, CHEK2, CEP70, ODF2, MASTL, TUBG1, PHLDA1, TUBB4B, CDK1, SKP2, TPX2, TPD52L1, BIRC5, CDK7, WEE1, CDC25A, CDC25B, CCNB1, AJUBA, PLK4, TUBA4A, MELK	1217	137	16792	3.02143	0.000512451	5.12569e-05	0.000240554
GOTERM_BP_DIRECT	GO:0000083~regulation of transcription involved in G1/S transition of mitotic cell cycle	12	0.817996	1.6479e-07	CCNE1, CDK1, CDC6, TYMS, CDC45, DHFR, RRM2, PCNA, POLA1, FBXO5, ORC1, CDT1	1217	23	16792	7.19889	0.000651533	5.92478e-05	0.000305863
GOTERM_BP_DIRECT	GO:0034080~CENP-A containing nucleosome assembly	15	1.02249	1.08046e-06	CENPO, CENPN, CENPM, CENPL, CENPQ, CENPK, CENPH, HJURP, CENPA, OIP5, MIS18A, CENPW, RUVBL1, CENPU, HIST1H4H	1217	43	16792	4.81321	0.00426409	0.000356037	0.00200539
GOTERM_BP_DIRECT	GO:0006271~DNA strand elongation involved in DNA replication	9	0.613497	3.00205e-06	GINS1, PRIM1, RFC3, RFC4, POLD1, GINS3, PRIM2, PCNA, POLA1	1217	15	16792	8.27872	0.0118029	0.000912902	0.0055719
GOTERM_BP_DIRECT	GO:0000731~DNA synthesis involved in DNA repair	13	0.886162	3.43561e-06	EXO1, RAD51AP1, BLM, POLA1, BRIP1, BRCA2, RMI2, RAD51, RBBP8, DNA2, RFC3, POLD1, BARD1	1217	35	16792	5.12492	0.0134959	0.000970089	0.00637656
GOTERM_BP_DIRECT	GO:0007051~spindle organization	9	0.613497	5.62222e-06	CEP72, KIF11, SPAG5, TTK, AURKA, AURKB, KNSTRN, ASPM, AUNIP	1217	16	16792	7.7613	0.0219905	0.0014813	0.0104348
GOTERM_BP_DIRECT	GO:0007080~mitotic metaphase plate congression	13	0.886162	6.65934e-06	KIF14, CCNB1, KIFC1, KIF2C, CDCA8, SEH1L, PSRC1, KIF18A, RRS1, CENPE, SPDL1, CEP55, CDCA5	1217	37	16792	4.8479	0.025994	0.00164476	0.0123595
GOTERM_BP_DIRECT	GO:0006281~DNA repair	37	2.52215	1.50625e-05	BLM, UNG, FOXM1, MORF4L2, POLA1, CHEK1, PTTG1, RPA3, POLE2, FANCI, FBXO6, ACTL6A, FANCG, POLQ, FEN1, RDM1, EXO1, CDK1, RAD51AP1, MSH2, LIG1, TRIM28, NEIL2, RAD54L, RBBP8, RAD51, NABP1, UHRF1, RFWD3, POLD1, PARPBP, DDB2, RUVBL1, ALKBH3, PARP1, ALKBH2, UBE2T	1217	235	16792	2.17243	0.0578331	0.00349815	0.0279536
GOTERM_BP_DIRECT	GO:0006268~DNA unwinding involved in DNA replication	7	0.477164	2.32094e-05	MCM7, MCM2, MCM4, TOP2A, C10ORF2, RAD51, MCM6	1217	10	16792	9.6585	0.0877073	0.00508671	0.0430697
GOTERM_BP_DIRECT	GO:0045926~negative regulation of growth	9	0.613497	2.71195e-05	HIF1A, MT1M, PNPT1, MT2A, MT1E, MT1H, MT1X, MT1G, MT1F	1217	19	16792	6.53583	0.101707	0.00562931	0.0503239
GOTERM_BP_DIRECT	GO:0007052~mitotic spindle organization	11	0.74983	3.00302e-05	CCNB1, STIL, SPC25, ASUN, KIF11, GPSM2, TTK, NDC80, AURKA, RCC1, KIF2A	1217	30	16792	5.05922	0.111989	0.00592096	0.0557237
GOTERM_BP_DIRECT	GO:0007076~mitotic chromosome condensation	8	0.545331	3.93615e-05	NCAPH, NCAPG, NUSAP1, CDCA5, SMC2, NCAPD3, SMC4, NCAPD2	1217	15	16792	7.35886	0.144165	0.00738581	0.0730327
GOTERM_BP_DIRECT	GO:0000732~strand displacement	10	0.681663	5.3711e-05	EXO1, DNA2, RAD51AP1, BLM, BRCA2, BRIP1, RMI2, RAD51, BARD1, RBBP8	1217	26	16792	5.30687	0.191385	0.00960956	0.0996448
GOTERM_BP_DIRECT	GO:0008283~cell proliferation	48	3.27198	8.93308e-05	CXCL1, STIL, CKS1B, ELF5, POLA1, HDGF, AURKB, MCM10, SCRIB, MIF, TYMS, KIF2C, MCM7, CSE1L, PRMT5, CKLF, MYC, TFDP1, GNL3, CDK1, CRIP1, MKI67, BYSL, DLGAP5, KIF15, FSCN1, PAK1IP1, SKP2, TPX2, CD160, CENPF, CDK7, TACC3, TNFSF9, CDK5, CDC25A, DDIT4, UHRF1, SIX1, PCNA, LIPG, CKS2, BUB1B, FOXC1, TCF19, ALKBH3, LRP2, MELK	1217	366	16792	1.80956	0.297647	0.0152443	0.165675
GOTERM_BP_DIRECT	GO:1901796~regulation of signal transduction by p53 class mediator	22	1.49966	0.000214501	EXO1, BLM, TAF5, TAF4B, TPX2, BRIP1, AURKA, CHEK1, RMI2, AURKB, CHEK2, CDK5, RPA3, RBBP8, DNA2, RFC3, RFC4, RFC2, PRMT5, RHNO1, SETD9, BARD1	1217	124	16792	2.44801	0.571919	0.0347342	0.397381
GOTERM_BP_DIRECT	GO:0051726~regulation of cell cycle	22	1.49966	0.000214501	E2F5, DTL, FIGNL1, FOXM1, CCNF, PRR11, SKP2, BEX2, CENPF, CCNG1, MYBL2, CDC25A, WEE1, LEP, CCNB1, CCNE2, CCNE1, ZNF703, CABLES2, MASTL, ID3, CCNDBP1	1217	124	16792	2.44801	0.571919	0.0347342	0.397381
GOTERM_BP_DIRECT	GO:0006302~double-strand break repair	15	1.02249	0.000221932	XRCC4, MSH2, LIG1, DTX3L, MND1, BRCA2, BRIP1, CHEK2, RAD21, MAD2L2, PARP1, POLQ, CDCA5, FEN1, TRIP13	1217	66	16792	3.13588	0.58432	0.0345042	0.411122
GOTERM_BP_DIRECT	GO:0071294~cellular response to zinc ion	8	0.545331	0.000238204	MT1M, MT2A, MT1E, PARP1, MT1H, MT1X, MT1G, MT1F	1217	19	16792	5.80963	0.610235	0.0355901	0.441203
GOTERM_BP_DIRECT	GO:0007093~mitotic cell cycle checkpoint	10	0.681663	0.0003246	MAD1L1, NABP1, MAD2L1, ZWINT, KNTC1, TTK, BUB1B, CHEK1, ZWILCH, CHFR	1217	32	16792	4.31183	0.723073	0.0464425	0.600768
GOTERM_BP_DIRECT	GO:0048146~positive regulation of fibroblast proliferation	13	0.886162	0.000391365	WNT5A, CDC6, UTS2, CDK6, CDK4, MIF, CCNB1, WNT2, EREG, PLA2G1B, PDGFD, MYC, CCNA2	1217	54	16792	3.32171	0.787359	0.0537903	0.723912
GOTERM_BP_DIRECT	GO:0007018~microtubule-based movement	16	1.09066	0.000632339	KIFC2, KIF14, KIF23, KIFC1, KIF4A, KIF11, KIF15, KIF18A, KIF18B, CENPE, RACGAP1, KIF2C, KIF20B, KIF21B, KIF2A, KIF20A	1217	81	16792	2.7255	0.918054	0.0826491	1.16718
GOTERM_BP_DIRECT	GO:0051988~regulation of attachment of spindle microtubules to kinetochore	5	0.340832	0.000801853	NEK2, SPAG5, RACGAP1, KNSTRN, ECT2	1217	7	16792	9.85562	0.958105	0.100353	1.47787
GOTERM_BP_DIRECT	GO:0032722~positive regulation of chemokine production	7	0.477164	0.00087916	TNF, HIF1A, ADORA2B, ADAM17, RIPK2, TLR3, LBP	1217	17	16792	5.68147	0.96915	0.106146	1.61925
GOTERM_BP_DIRECT	GO:0001833~inner cell mass cell proliferation	6	0.408998	0.00101658	GINS1, PRPF19, SALL4, NCAPG2, BRCA2, CHEK1	1217	12	16792	6.89893	0.982094	0.118127	1.87011
GOTERM_BP_DIRECT	GO:0031145~anaphase-promoting complex-dependent catabolic process	15	1.02249	0.00147878	CDK1, SKP2, AURKA, CDC20, PTTG1, AURKB, UBE2C, PSMA7, CCNB1, MAD2L1, PSMC4, PSMB3, PSMD3, BUB1B, UBE2S	1217	79	16792	2.61985	0.997128	0.162522	2.70938
GOTERM_BP_DIRECT	GO:0051315~attachment of mitotic spindle microtubules to kinetochore	5	0.340832	0.00151179	KIF2C, MAD1L1, SEH1L, CENPE, NDC80	1217	8	16792	8.62366	0.99748	0.161373	2.76906
GOTERM_BP_DIRECT	GO:0000076~DNA replication checkpoint	5	0.340832	0.00151179	CDC6, DNA2, CDC45, TIPIN, CDT1	1217	8	16792	8.62366	0.99748	0.161373	2.76906
GOTERM_BP_DIRECT	GO:0000079~regulation of cyclin-dependent protein serine/threonine kinase activity	10	0.681663	0.0015497	CCNE2, CDC6, GTPBP4, BLM, CCNYL1, CDK7, CCNG1, CDKN3, CCNA2, CDC25A	1217	39	16792	3.53791	0.997832	0.160755	2.83756
GOTERM_BP_DIRECT	GO:0042276~error-prone translesion synthesis	7	0.477164	0.00170021	RFC3, RFC4, POLE2, RFC2, PCNA, MAD2L2, RPA3	1217	19	16792	5.08342	0.998806	0.170511	3.10904
GOTERM_BP_DIRECT	GO:0051276~chromosome organization	7	0.477164	0.00170021	CDCA8, PTTG3P, CENPW, PTTG1, RAD54L, MYC, SMC4	1217	19	16792	5.08342	0.998806	0.170511	3.10904
GOTERM_BP_DIRECT	GO:0000278~mitotic cell cycle	10	0.681663	0.00224834	PAK3, NUDT15, RRM1, CENPF, KIF18B, CENPW, CENPE, MYB, CDC25B, TFDP1	1217	41	16792	3.36533	0.999864	0.213844	4.09172
GOTERM_BP_DIRECT	GO:0006284~base-excision repair	9	0.613497	0.00298574	DNA2, LIG1, UNG, NEIL3, NEIL2, PRMT6, POLQ, FEN1, RPA3	1217	35	16792	3.54802	0.999993	0.267445	5.39884
GOTERM_BP_DIRECT	GO:0010032~meiotic chromosome condensation	4	0.272665	0.00339003	SMC2, NCAPD3, SMC4, NCAPD2	1217	5	16792	11.0383	0.999999	0.291332	6.10832
GOTERM_BP_DIRECT	GO:0090307~mitotic spindle assembly	9	0.613497	0.00359942	KIFC1, KIF11, NEK2, MZT1, TPX2, BIRC5, CHEK2, MYBL2, KIF2A	1217	36	16792	3.44947	0.999999	0.299902	6.47381
GOTERM_BP_DIRECT	GO:0032508~DNA duplex unwinding	10	0.681663	0.00374197	GINS1, DHX9, DNA2, CDC45, BLM, BRIP1, RAD54B, RUVBL1, MCM3, MCM5	1217	44	16792	3.13588	1	0.303467	6.72183
GOTERM_BP_DIRECT	GO:0000281~mitotic cytokinesis	8	0.545331	0.00389624	KIF23, KIF4A, CENPA, NUSAP1, ANLN, CEP55, RACGAP1, KIF20A	1217	29	16792	3.80631	1	0.307615	6.98957
GOTERM_BP_DIRECT	GO:0034501~protein localization to kinetochore	5	0.340832	0.00403231	CDK1, TTK, BUB1B, SPDL1, AURKB	1217	10	16792	6.89893	1	0.310389	7.2251
GOTERM_BP_DIRECT	GO:0048387~negative regulation of retinoic acid receptor signaling pathway	5	0.340832	0.00403231	ZNF536, DHRS3, PRAME, CYP26B1, EZH2	1217	10	16792	6.89893	1	0.310389	7.2251
GOTERM_BP_DIRECT	GO:0016925~protein sumoylation	18	1.22699	0.00447348	XRCC4, BLM, TRIM28, MITF, NUP85, BIRC5, AURKB, NUP155, NDC1, CDCA8, RAD21, CDKN2A, SEH1L, PCNA, NOP58, NUP107, PARP1, TOP2A	1217	117	16792	2.12275	1	0.331693	7.98491
GOTERM_BP_DIRECT	GO:0006629~lipid metabolic process	22	1.49966	0.00464699	ENPP6, PLCXD3, PTPRN2, CLU, PTGS1, ACLY, GPCPD1, ACAT2, LEP, PLCL2, FAR2, CD36, PTGDS, LIPG, CPNE1, PAFAH1B3, CPNE3, LRP8, LIPC, LRP2, FABP5, SLC27A4	1217	157	16792	1.93346	1	0.335932	8.28211
GOTERM_BP_DIRECT	GO:0090502~RNA phosphodiester bond hydrolysis, endonucleolytic	11	0.74983	0.00559465	EXO1, RNASE1, POP1, AGO2, DBR1, POP4, CPSF3, RNASEH2A, RPP40, POP7, FEN1	1217	55	16792	2.75957	1	0.382681	9.88942
GOTERM_BP_DIRECT	GO:0031100~organ regeneration	10	0.681663	0.00591922	CDK1, APOA2, MKI67, ATIC, CDK4, ANGPT2, CCNA2, GSTP1, PPAT, PRPS1	1217	47	16792	2.93572	1	0.393212	10.4338
GOTERM_BP_DIRECT	GO:0003323~type B pancreatic cell development	5	0.340832	0.0059762	WNT5A, BMP4, CDK6, NKX2-2, BMP5	1217	11	16792	6.27176	1	0.389753	10.529
GOTERM_BP_DIRECT	GO:0006297~nucleotide-excision repair, DNA gap filling	7	0.477164	0.00617533	RFC3, RFC4, RFC2, LIG1, POLD1, PCNA, RPA3	1217	24	16792	4.02438	1	0.393459	10.8611
GOTERM_BP_DIRECT	GO:0007088~regulation of mitotic nuclear division	7	0.477164	0.00617533	MKI67, NEK2, PRMT5, BORA, KIF20B, FBXO5, RCC1	1217	24	16792	4.02438	1	0.393459	10.8611
GOTERM_BP_DIRECT	GO:0021987~cerebral cortex development	11	0.74983	0.00637951	KIF14, ASCL1, HIF1A, ATIC, BAX, CNTNAP2, LRP8, CDH2, GNG12, TACC3, ASPM	1217	56	16792	2.71029	1	0.39724	11.2004
GOTERM_BP_DIRECT	GO:0032873~negative regulation of stress-activated MAPK cascade	4	0.272665	0.00641545	FOXM1, PBK, MYC, GSTP1	1217	6	16792	9.19858	1	0.392932	11.26
GOTERM_BP_DIRECT	GO:0006189~'de novo' IMP biosynthetic process	4	0.272665	0.00641545	ATIC, PAICS, PFAS, PPAT	1217	6	16792	9.19858	1	0.392932	11.26
GOTERM_BP_DIRECT	GO:0071156~regulation of cell cycle arrest	4	0.272665	0.00641545	SLC25A33, FOXM1, NEUROD1, CDK5	1217	6	16792	9.19858	1	0.392932	11.26
GOTERM_BP_DIRECT	GO:0006310~DNA recombination	14	0.954329	0.00646214	EXO1, XRCC4, HMGB3, BLM, LIG1, RAD54L, RPA4, RAD51, RPA3, PAXIP1, RAD21, ACTL6A, RUVBL1, RDM1	1217	83	16792	2.32735	1	0.389264	11.3374
GOTERM_BP_DIRECT	GO:0000724~double-strand break repair via homologous recombination	13	0.886162	0.00658736	RAD51AP1, BLM, BRCA2, RAD54L, RAD51, RBBP8, RPA3, NABP1, SFR1, RAD54B, PARP1, POLQ, FEN1	1217	74	16792	2.42395	1	0.389326	11.5445
GOTERM_BP_DIRECT	GO:0007346~regulation of mitotic cell cycle	9	0.613497	0.00707603	CKS1B, ASCL1, ASUN, CKS2, RPRM, FBXO5, BIRC5, MYC, RPA3	1217	40	16792	3.10452	1	0.405537	12.3487
GOTERM_BP_DIRECT	GO:0001556~oocyte maturation	6	0.408998	0.00763348	CCNB1, EREG, FBXO5, BRCA2, CDC25B, TRIP13	1217	18	16792	4.59929	1	0.42364	13.2576
GOTERM_BP_DIRECT	GO:0042493~response to drug	35	2.38582	0.00764118	UTS2, ASS1, CTPS1, OXTR, CDH3, PFAS, TYMS, APOA2, TNFRSF11B, MCM7, DAB1, HADH, GAD1, FOSL1, MYC, DNMT3B, TXNIP, CDK1, GGH, CENPF, ACACB, CDK4, RAD54L, PPARGC1A, CPT1A, RAD51, CCNB1, BLMH, WFDC1, ADAM17, NEUROD1, LRP8, IGFBP2, HTR2C, DUSP6	1217	304	16792	1.58857	1	0.418259	13.27
GOTERM_BP_DIRECT	GO:0042127~regulation of cell proliferation	24	1.63599	0.00772829	BID, TXNIP, PTGER2, TNF, FOXM1, EZH2, PTGS1, CXCL2, BMX, CHEK1, CXCL6, KIT, PF4V1, LGR5, RPA3, TNFRSF11B, PLA2G4A, TNFRSF10B, CDCA7, DNMT1, TFAP2C, NR5A2, NKX2-3, GNL3	1217	185	16792	1.78999	1	0.41627	13.4112
GOTERM_BP_DIRECT	GO:0001649~osteoblast differentiation	16	1.09066	0.00782248	BMP4, IBSP, DHX9, CYP24A1, GTPBP4, FIGNL1, ALYREF, SOX2, FHL2, LRRC17, CBFB, FBL, MSX2, DDX21, HSPE1, SPP1	1217	104	16792	2.12275	1	0.414629	13.5637
GOTERM_BP_DIRECT	GO:0006164~purine nucleotide biosynthetic process	5	0.340832	0.00845601	ATIC, PFAS, IMPDH2, PPAT, PRPS1	1217	12	16792	5.74911	1	0.43405	14.5824
GOTERM_BP_DIRECT	GO:0051382~kinetochore assembly	5	0.340832	0.00845601	CENPA, CENPF, CENPW, CENPE, CENPH	1217	12	16792	5.74911	1	0.43405	14.5824
GOTERM_BP_DIRECT	GO:0051310~metaphase plate congression	5	0.340832	0.00845601	KIF2C, CENPQ, CENPF, CENPE, NDC80	1217	12	16792	5.74911	1	0.43405	14.5824
GOTERM_BP_DIRECT	GO:0071897~DNA biosynthetic process	7	0.477164	0.00933159	TYMS, POLE3, LIG1, PRIM2, CENPF, POLQ, TK1	1217	26	16792	3.71481	1	0.460976	15.9716
GOTERM_BP_DIRECT	GO:0032757~positive regulation of interleukin-8 production	7	0.477164	0.00933159	TNF, SERPINE1, TLR3, FADD, LBP, TLR5, ADIPOQ	1217	26	16792	3.71481	1	0.460976	15.9716
GOTERM_BP_DIRECT	GO:0051782~negative regulation of cell division	4	0.272665	0.0106256	TXNIP, BLM, C10ORF99, MYC	1217	7	16792	7.88449	1	0.499732	17.9856
GOTERM_BP_DIRECT	GO:0006641~triglyceride metabolic process	8	0.545331	0.0114916	APOA2, PNLIPRP2, SLC22A4, PCSK9, GK3P, GK, CPT1A, NKX2-3	1217	35	16792	3.1538	1	0.521594	19.3078
GOTERM_BP_DIRECT	GO:0006298~mismatch repair	8	0.545331	0.0114916	EXO1, MSH2, LIG1, POLD1, PCNA, MLH1, RNASEH2A, RPA3	1217	35	16792	3.1538	1	0.521594	19.3078
GOTERM_BP_DIRECT	GO:0009168~purine ribonucleoside monophosphate biosynthetic process	5	0.340832	0.0115236	ATIC, PAICS, PFAS, IMPDH2, PPAT	1217	13	16792	5.30687	1	0.516946	19.3563
GOTERM_BP_DIRECT	GO:0016540~protein autoprocessing	5	0.340832	0.0115236	KLK6, F12, PCSK9, PARP1, CTSV	1217	13	16792	5.30687	1	0.516946	19.3563
GOTERM_BP_DIRECT	GO:0007094~mitotic spindle assembly checkpoint	6	0.408998	0.0122428	MAD1L1, MAD2L1, CENPF, TTK, BUB1B, MAD2L2	1217	20	16792	4.13936	1	0.532912	20.4384
GOTERM_BP_DIRECT	GO:0006635~fatty acid beta-oxidation	9	0.613497	0.01263	LEP, ECI2, ECH1, ECHDC2, BDH2, ACAT2, HADH, ADIPOQ, CPT1A	1217	44	16792	2.82229	1	0.538551	21.0153
GOTERM_BP_DIRECT	GO:0008284~positive regulation of cell proliferation	48	3.27198	0.0131881	CLDN7, E2F3, KRT6A, GCNT2, CDX2, PRC1, FOXM1, TIPIN, EIF5A, TTK, NMB, ESM1, KIT, HMGN5, IL11, LIF, WNT2, ZNF703, PDGFD, FOSL1, MYC, FGF3, CDC7, KIF14, ODC1, SHMT2, ADAM10, PRAME, KLB, LIFR, CDC20, HILPDA, BIRC5, IL24, CDK4, PROX1, CDC25B, HOXC10, LEP, NOP2, EREG, SLC25A33, KIF20B, SP6, ADAM17, ID4, SERPINB3, BAMBI	1217	466	16792	1.42124	1	0.548663	21.8398
GOTERM_BP_DIRECT	GO:0042769~DNA damage response, detection of DNA damage	8	0.545331	0.0133966	RFC3, RFC4, DTL, RFC2, POLD1, PCNA, PARP1, RPA3	1217	36	16792	3.06619	1	0.548935	22.1457
GOTERM_BP_DIRECT	GO:0032355~response to estradiol	14	0.954329	0.0137595	TXNIP, BID, ASS1, EZH2, OXTR, RBBP8, LEP, GPI, PCNA, WFDC1, IGFBP2, DNMT3B, MYC, GSTP1	1217	91	16792	2.12275	1	0.553285	22.6756
GOTERM_BP_DIRECT	GO:0051383~kinetochore organization	3	0.204499	0.0149622	SMC2, CENPH, SMC4	1217	3	16792	13.7979	1	0.578569	24.4072
GOTERM_BP_DIRECT	GO:0002282~microglial cell activation involved in immune response	3	0.204499	0.0149622	CX3CR1, TLR3, IL33	1217	3	16792	13.7979	1	0.578569	24.4072
GOTERM_BP_DIRECT	GO:0000132~establishment of mitotic spindle orientation	6	0.408998	0.015131	SPRY2, CENPA, GPSM2, NDC80, SPDL1, WDR43	1217	21	16792	3.94225	1	0.577444	24.6472
GOTERM_BP_DIRECT	GO:0030194~positive regulation of blood coagulation	5	0.340832	0.0152234	F12, CD36, HPSE, ENPP4, SERPINE1	1217	14	16792	4.92781	1	0.574517	24.7784
GOTERM_BP_DIRECT	GO:0006296~nucleotide-excision repair, DNA incision, 5'-to lesion	8	0.545331	0.0155176	RFC3, RFC4, RFC2, POLD1, PCNA, DDB2, PARP1, RPA3	1217	37	16792	2.98332	1	0.576447	25.1944
GOTERM_BP_DIRECT	GO:0032467~positive regulation of cytokinesis	8	0.545331	0.0155176	KIF23, KIF14, CDC6, KIF20B, AURKB, RACGAP1, ECT2, CDC25B	1217	37	16792	2.98332	1	0.576447	25.1944
GOTERM_BP_DIRECT	GO:0008033~tRNA processing	8	0.545331	0.0155176	PUS1, LAGE3, TRMT12, POP1, POP4, PUS7, POP7, FBL	1217	37	16792	2.98332	1	0.576447	25.1944
GOTERM_BP_DIRECT	GO:0006974~cellular response to DNA damage stimulus	25	1.70416	0.0158518	TP53TG1, BLM, TIPIN, CHEK1, PMAIP1, CHEK2, MCM10, MCM7, WDR76, MASTL, FANCG, POLQ, MYC, TOP2A, FBXO45, DDX39A, DTL, DTX3L, CTLA4, ATAD5, RAD51, NABP1, PARP1, UBE2T, BARD1	1217	208	16792	1.6584	1	0.579243	25.6643
GOTERM_BP_DIRECT	GO:0097421~liver regeneration	7	0.477164	0.0159998	TYMS, PRMT5, EZH2, PCNA, RGN, AURKA, MYC	1217	29	16792	3.33052	1	0.5777	25.8715
GOTERM_BP_DIRECT	GO:0051256~mitotic spindle midzone assembly	4	0.272665	0.016094	KIF23, KIF4A, AURKB, RACGAP1	1217	8	16792	6.89893	1	0.574968	26.0031
GOTERM_BP_DIRECT	GO:0060236~regulation of mitotic spindle organization	4	0.272665	0.016094	PSRC1, BORA, TPX2, TACC3	1217	8	16792	6.89893	1	0.574968	26.0031
GOTERM_BP_DIRECT	GO:0006766~vitamin metabolic process	4	0.272665	0.016094	CYP24A1, CYP27B1, CYP26B1, LRP2	1217	8	16792	6.89893	1	0.574968	26.0031
GOTERM_BP_DIRECT	GO:0033683~nucleotide-excision repair, DNA incision	8	0.545331	0.0178666	RFC3, RFC4, RFC2, POLD1, PCNA, DDB2, PARP1, RPA3	1217	38	16792	2.90481	1	0.608658	28.4387
GOTERM_BP_DIRECT	GO:0010165~response to X-ray	6	0.408998	0.018441	XRCC4, BLM, MSH2, BRCA2, PMAIP1, RAD51	1217	22	16792	3.76305	1	0.615588	29.2116
GOTERM_BP_DIRECT	GO:0007623~circadian rhythm	12	0.817996	0.0186813	LEP, TYMS, KLF9, SERPINE1, ID4, ID3, TPH1, CDK4, PROX1, ADIPOQ, PPARGC1A, CPT1A	1217	75	16792	2.20766	1	0.615649	29.5326
GOTERM_BP_DIRECT	GO:0006264~mitochondrial DNA replication	4	0.272665	0.0228581	DNA2, SLC25A33, MGME1, C10ORF2	1217	9	16792	6.13238	1	0.685771	34.8963
GOTERM_BP_DIRECT	GO:0016446~somatic hypermutation of immunoglobulin genes	5	0.340832	0.0246585	EXO1, MSH2, UNG, MLH1, POLQ	1217	16	16792	4.31183	1	0.708972	37.087
GOTERM_BP_DIRECT	GO:0051289~protein homotetramerization	10	0.681663	0.0278071	SHMT2, GPX3, ACOT13, CDA, ACACB, CRYZ, IMPDH2, PPAT, DCTPP1, TK1	1217	60	16792	2.29964	1	0.74766	40.7517
GOTERM_BP_DIRECT	GO:0060421~positive regulation of heart growth	3	0.204499	0.0284911	ACACB, PROX1, WT1	1217	4	16792	10.3484	1	0.751951	41.5206
GOTERM_BP_DIRECT	GO:0006564~L-serine biosynthetic process	3	0.204499	0.0284911	SHMT2, PSAT1, PSPH	1217	4	16792	10.3484	1	0.751951	41.5206
GOTERM_BP_DIRECT	GO:0031577~spindle checkpoint	3	0.204499	0.0284911	BIRC5, SPDL1, AURKB	1217	4	16792	10.3484	1	0.751951	41.5206
GOTERM_BP_DIRECT	GO:0043504~mitochondrial DNA repair	3	0.204499	0.0284911	DNA2, MGME1, PARP1	1217	4	16792	10.3484	1	0.751951	41.5206
GOTERM_BP_DIRECT	GO:0060708~spongiotrophoblast differentiation	3	0.204499	0.0284911	LIF, ASCL2, GJB5	1217	4	16792	10.3484	1	0.751951	41.5206
GOTERM_BP_DIRECT	GO:0043137~DNA replication, removal of RNA primer	3	0.204499	0.0284911	DNA2, RNASEH2A, FEN1	1217	4	16792	10.3484	1	0.751951	41.5206
GOTERM_BP_DIRECT	GO:0046602~regulation of mitotic centrosome separation	3	0.204499	0.0284911	KIF11, NEK2, CHEK1	1217	4	16792	10.3484	1	0.751951	41.5206
GOTERM_BP_DIRECT	GO:0051661~maintenance of centrosome location	3	0.204499	0.0284911	TBCCD1, GPSM2, ASPM	1217	4	16792	10.3484	1	0.751951	41.5206
GOTERM_BP_DIRECT	GO:0010827~regulation of glucose transport	7	0.477164	0.0291932	NDC1, FFAR4, SEH1L, TRIB3, NUP85, NUP107, NUP155	1217	33	16792	2.92682	1	0.756291	42.3001
GOTERM_BP_DIRECT	GO:0002088~lens development in camera-type eye	7	0.477164	0.0291932	WNT5A, WNT2, CRYBA2, CDK4, NHS, PROX1, TBC1D32	1217	33	16792	2.92682	1	0.756291	42.3001
GOTERM_BP_DIRECT	GO:0071276~cellular response to cadmium ion	5	0.340832	0.0304435	MT1E, MT1H, MT1X, MT1G, MT1F	1217	17	16792	4.0582	1	0.766752	43.6639
GOTERM_BP_DIRECT	GO:0046888~negative regulation of hormone secretion	4	0.272665	0.0309263	LIF, NMB, ADIPOQ, IL11	1217	10	16792	5.51915	1	0.768159	44.1823
GOTERM_BP_DIRECT	GO:0051085~chaperone mediated protein folding requiring cofactor	4	0.272665	0.0309263	HSPH1, TOR1B, HSPE1, DNAJB1	1217	10	16792	5.51915	1	0.768159	44.1823
GOTERM_BP_DIRECT	GO:0046653~tetrahydrofolate metabolic process	4	0.272665	0.0309263	MTHFD2, TYMS, SHMT2, DHFR	1217	10	16792	5.51915	1	0.768159	44.1823
GOTERM_BP_DIRECT	GO:0010820~positive regulation of T cell chemotaxis	4	0.272665	0.0309263	WNT5A, ADAM10, S100A7, ADAM17	1217	10	16792	5.51915	1	0.768159	44.1823
GOTERM_BP_DIRECT	GO:0007019~microtubule depolymerization	4	0.272665	0.0309263	KIF14, KIF2C, KIF18A, KIF18B	1217	10	16792	5.51915	1	0.768159	44.1823
GOTERM_BP_DIRECT	GO:0006913~nucleocytoplasmic transport	6	0.408998	0.0311034	RSRC1, ANP32E, NEUROD1, EIF5A, NUP155, CDK5	1217	25	16792	3.31149	1	0.766159	44.3714
GOTERM_BP_DIRECT	GO:0051436~negative regulation of ubiquitin-protein ligase activity involved in mitotic cell cycle	11	0.74983	0.0312407	CCNB1, CDK1, MAD2L1, PSMC4, PSMB3, FBXO5, PSMD3, BUB1B, CDC20, UBE2C, PSMA7	1217	71	16792	2.1377	1	0.763747	44.5175
GOTERM_BP_DIRECT	GO:0006977~DNA damage response, signal transduction by p53 class mediator resulting in cell cycle arrest	10	0.681663	0.0335866	CCNB1, CDK1, E2F7, BAX, PCNA, ARID3A, AURKA, CHEK2, GTSE1, TFDP1	1217	62	16792	2.22546	1	0.784635	46.9589
GOTERM_BP_DIRECT	GO:0009611~response to wounding	10	0.681663	0.0367661	KLK6, F2RL2, KLK8, SOX2, CX3CR1, AURKA, ID3, MYC, CDK5, FABP5	1217	63	16792	2.19014	1	0.810736	50.106
GOTERM_BP_DIRECT	GO:0051170~nuclear import	5	0.340832	0.0369607	GEMIN2, SNRPB, SNRPD1, SNRPF, HNRNPA1	1217	18	16792	3.83274	1	0.808907	50.2927
GOTERM_BP_DIRECT	GO:0061436~establishment of skin barrier	5	0.340832	0.0369607	CYP26B1, CLDN1, GRHL3, GRHL1, ABCA12	1217	18	16792	3.83274	1	0.808907	50.2927
GOTERM_BP_DIRECT	GO:0043691~reverse cholesterol transport	5	0.340832	0.0369607	APOA2, CLU, LIPG, LIPC, ABCG1	1217	18	16792	3.83274	1	0.808907	50.2927
GOTERM_BP_DIRECT	GO:0007077~mitotic nuclear envelope disassembly	8	0.545331	0.0373313	NDC1, CCNB1, CDK1, VRK1, SEH1L, NUP85, NUP107, NUP155	1217	44	16792	2.5087	1	0.808628	50.6466
GOTERM_BP_DIRECT	GO:0034644~cellular response to UV	8	0.545331	0.0373313	POLD1, BAX, PCNA, RHNO1, PBK, AURKB, MYC, CDC25A	1217	44	16792	2.5087	1	0.808628	50.6466
GOTERM_BP_DIRECT	GO:0006654~phosphatidic acid biosynthetic process	7	0.477164	0.0378735	PLA2G4A, AGPAT5, LPCAT1, PLA2G2A, PLA2G1B, LCLAT1, GPAT2	1217	35	16792	2.75957	1	0.80982	51.16
GOTERM_BP_DIRECT	GO:0006283~transcription-coupled nucleotide-excision repair	11	0.74983	0.0400781	POLR2H, PRPF19, RFC3, RFC4, RFC2, LIG1, POLD1, PCNA, CDK7, POLR2D, RPA3	1217	74	16792	2.05103	1	0.82439	53.1958
GOTERM_BP_DIRECT	GO:0001682~tRNA 5'-leader removal	4	0.272665	0.0402826	POP1, POP4, RPP40, POP7	1217	11	16792	5.0174	1	0.822707	53.3806
GOTERM_BP_DIRECT	GO:0046325~negative regulation of glucose import	4	0.272665	0.0402826	LEP, GRB10, TNF, MYC	1217	11	16792	5.0174	1	0.822707	53.3806
GOTERM_BP_DIRECT	GO:0034374~low-density lipoprotein particle remodeling	4	0.272665	0.0402826	APOA2, PLA2G2A, LIPC, ABCG1	1217	11	16792	5.0174	1	0.822707	53.3806
GOTERM_BP_DIRECT	GO:0032755~positive regulation of interleukin-6 production	8	0.545331	0.0415531	WNT5A, TNF, CD36, ADORA2B, RIPK2, TLR3, IL33, LBP	1217	45	16792	2.45295	1	0.829137	54.5129
GOTERM_BP_DIRECT	GO:0048863~stem cell differentiation	6	0.408998	0.041971	LIF, MSX2, PHF19, SETD6, KIT, ETV4	1217	27	16792	3.06619	1	0.829062	54.8796
GOTERM_BP_DIRECT	GO:0019985~translesion synthesis	7	0.477164	0.0427689	RFC3, RFC4, DTL, RFC2, POLD1, PCNA, RPA3	1217	36	16792	2.68292	1	0.831735	55.572
GOTERM_BP_DIRECT	GO:0070987~error-free translesion synthesis	5	0.340832	0.0442162	RFC3, RFC4, RFC2, PCNA, RPA3	1217	19	16792	3.63102	1	0.838797	56.8024
GOTERM_BP_DIRECT	GO:0042246~tissue regeneration	5	0.340832	0.0442162	CCNB1, KLK6, SOX2, NINJ2, IGFBP1	1217	19	16792	3.63102	1	0.838797	56.8024
GOTERM_BP_DIRECT	GO:0009156~ribonucleoside monophosphate biosynthetic process	3	0.204499	0.0452251	ADK, PFAS, PRPS1	1217	5	16792	8.27872	1	0.842582	57.6409
GOTERM_BP_DIRECT	GO:0000212~meiotic spindle organization	3	0.204499	0.0452251	AURKA, ESPL1, TUBG1	1217	5	16792	8.27872	1	0.842582	57.6409
GOTERM_BP_DIRECT	GO:0051304~chromosome separation	3	0.204499	0.0452251	TTK, NCAPD3, NCAPD2	1217	5	16792	8.27872	1	0.842582	57.6409
GOTERM_BP_DIRECT	GO:0034123~positive regulation of toll-like receptor signaling pathway	3	0.204499	0.0452251	TLR3, PIK3AP1, TLR5	1217	5	16792	8.27872	1	0.842582	57.6409
GOTERM_BP_DIRECT	GO:0001822~kidney development	12	0.817996	0.0456602	BMP4, ODC1, ASS1, BAX, ITGA8, SIX1, CENPF, RGN, PCSK9, PROX1, WT1, PPAT	1217	86	16792	1.92528	1	0.842509	57.9977
GOTERM_BP_DIRECT	GO:0051437~positive regulation of ubiquitin-protein ligase activity involved in regulation of mitotic cell cycle transition	11	0.74983	0.0468407	CCNB1, CDK1, MAD2L1, PSMC4, PSMB3, FBXO5, PSMD3, BUB1B, CDC20, UBE2C, PSMA7	1217	76	16792	1.99706	1	0.84719	58.9517
GOTERM_BP_DIRECT	GO:0000387~spliceosomal snRNP assembly	6	0.408998	0.0481613	GEMIN2, PRMT5, SNRPB, SNRPD1, SNRPC, SNRPF	1217	28	16792	2.95669	1	0.852496	59.9945
GOTERM_BP_DIRECT	GO:0045931~positive regulation of mitotic cell cycle	6	0.408998	0.0481613	CCNB1, CDK1, EIF4EBP1, BRCA2, BIRC5, CDC25B	1217	28	16792	2.95669	1	0.852496	59.9945
