# Supplementary material for: Identification of the hub genes in gastric cancer through weighted gene co-expression network analysis
Source: PeerJ. 2021 Mar 5;9:e10682. doi: 10.7717/peerj.10682 (PMC7938783; doi:10.7717/peerj.10682)
Supplement: Table S2 [file peerj-09-10682-s003.xls]

## Sheet: black GO BP
Category	Term	Count	%	PValue	Genes	List Total	Pop Hits	Pop Total	Fold Enrichment	Bonferroni	Benjamini	FDR
GOTERM_BP_DIRECT	GO:0010107~potassium ion import	5	3.78788	3.39354e-05	KCNJ16, KCNJ15, ATP4A, KCNE2, KCNJ13	113	28	16792	26.536	0.0231438	0.0231438	0.0510659
GOTERM_BP_DIRECT	GO:0007586~digestion	5	3.78788	0.000825192	CELA3A, CHIA, SULT2A1, CCKBR, SST	113	63	16792	11.7938	0.434258	0.247842	1.23487
GOTERM_BP_DIRECT	GO:0050891~multicellular organismal water homeostasis	3	2.27273	0.00120262	AQP4, SCNN1G, SCNN1B	113	8	16792	55.7257	0.564085	0.24177	1.79492
GOTERM_BP_DIRECT	GO:1900004~negative regulation of serine-type endopeptidase activity	3	2.27273	0.00278573	SPINK13, SPINK2, SPINK7	113	12	16792	37.1504	0.8541	0.381964	4.11188
GOTERM_BP_DIRECT	GO:0055114~oxidation-reduction process	11	8.33333	0.00621247	TM7SF2, FMO4, RDH12, ALDH6A1, CYP4X1, PLOD1, CYP2C8, FMO6P, ADH7, ACADL, LIPF	113	592	16792	2.76118	0.986431	0.576836	8.95344
GOTERM_BP_DIRECT	GO:0060021~palate development	4	3.0303	0.0142732	PKDCC, COL2A1, PRDM16, EPHB3	113	76	16792	7.82115	0.999951	0.808573	19.4573
GOTERM_BP_DIRECT	GO:0050728~negative regulation of inflammatory response	4	3.0303	0.0158273	CXCL17, GHRL, GPER1, ADA	113	79	16792	7.52414	0.999983	0.792495	21.3476
GOTERM_BP_DIRECT	GO:0006813~potassium ion transport	4	3.0303	0.0174731	KCNJ16, KCNJ15, ATP4B, KCNJ13	113	82	16792	7.24887	0.999995	0.78137	23.3041
GOTERM_BP_DIRECT	GO:0045907~positive regulation of vasoconstriction	3	2.27273	0.0191971	FGG, HRH1, FGA	113	32	16792	13.9314	0.999998	0.773744	25.3049
GOTERM_BP_DIRECT	GO:0072378~blood coagulation, fibrin clot formation	2	1.51515	0.026416	FGG, FGA	113	4	16792	74.3009	1	0.842323	33.1653
GOTERM_BP_DIRECT	GO:0005975~carbohydrate metabolic process	5	3.78788	0.0291717	B3GAT1, GCKR, FUT9, CHIA, FUT1	113	174	16792	4.27017	1	0.843873	35.9568
GOTERM_BP_DIRECT	GO:0032962~positive regulation of inositol trisphosphate biosynthetic process	2	1.51515	0.0329112	HRH1, GPER1	113	5	16792	59.4407	1	0.854012	39.5709
GOTERM_BP_DIRECT	GO:0034765~regulation of ion transmembrane transport	4	3.0303	0.038138	KCNJ16, KCNJ15, CLIC6, KCNJ13	113	111	16792	5.35502	1	0.873037	44.3045
GOTERM_BP_DIRECT	GO:0001696~gastric acid secretion	2	1.51515	0.0393634	CCKBR, GHRL	113	6	16792	49.5339	1	0.86183	45.3629
GOTERM_BP_DIRECT	GO:0046500~S-adenosylmethionine metabolic process	2	1.51515	0.045773	BHMT, GNMT	113	7	16792	42.4576	1	0.884128	50.6001
