# Supplementary material for: Identification of the hub genes in gastric cancer through weighted gene co-expression network analysis
Source: PeerJ. 2021 Mar 5;9:e10682. doi: 10.7717/peerj.10682 (PMC7938783; doi:10.7717/peerj.10682)
Supplement: Table S3 [file peerj-09-10682-s004.xls]

## Sheet: turquoise GO BP 删掉p大于0.05
Category	Term	Count	%	PValue	Genes	List Total	Pop Hits	Pop Total	Fold Enrichment	Bonferroni	Benjamini	FDR
GOTERM_BP_DIRECT	GO:0030198~extracellular matrix organization	42	2.03291	6.3e-06	VIT, ECM2, LAMA2, COL14A1, PDGFA, NDNF, LAMC2, FBLN1, OLFML2A, F11R, FGF2, FBLN5, PRDX4, CDH1, ABI3BP, SOX9, JAM2, JAM3, FGB, POSTN, EGFL6, LAMB3, FOXF2, LAMB2, ITGA3, FOXF1, ITGA2, ITGA1, SPINK5, SERPINB5, DCN, MFAP5, SMOC2, CCDC80, COL4A4, COL6A2, COL4A6, COL8A2, ITGA7, ITGA6, NOX1, DDR2	1717	196	16792	2.09568	0.0301322	0.00891922	0.00888802
GOTERM_BP_DIRECT	GO:0030335~positive regulation of cell migration	40	1.93611	7.57e-06	SEMA5A, GRB7, CSF1R, CCL11, ONECUT2, SEMA3C, SEMA3G, ILK, PDGFA, LAMC2, IRS2, CIB1, SEMA3E, PIK3R1, CXCL16, MYLK, FAM83H, MIEN1, PDGFC, CTSH, ZNF304, LYN, CCL24, EDN1, MYOC, F10, FOXF1, SEMA4B, RDX, RRAS2, IGF1, RHOD, F3, VEGFA, VIL1, DAB2, CEACAM6, MYADM, ITGA6, ROR2	1717	184	16792	2.12605	0.0361176	0.00891922	0.00888802
GOTERM_BP_DIRECT	GO:0007411~axon guidance	36	1.7425	9.18e-06	ROBO2, CSF1R, ROBO3, TENM2, NRP2, LAMA2, SEMA3C, SEMA3A, NRXN1, NRXN3, EFNA5, GLI3, NRAS, RELN, CHL1, DPYSL2, ZNF280B, BOC, NCAM1, FYN, SLIT2, MYH10, LGI1, SEMA6A, LAMB2, BDNF, PAX6, L1CAM, ENAH, TTC8, NR4A3, CXCL12, FEZ1, PRKCQ, CNTN4, EZR	1717	159	16792	2.21431	0.0436165	0.00891922	0.00888802
GOTERM_BP_DIRECT	GO:0007165~signal transduction	163	7.88964	1.82e-05	CHRM3, FAM13B, IRS1, LY75, IRS2, NR3C1, FGF2, PYCARD, HPGDS, FGF7, SALL2, FGF9, RASSF3, DPYSL2, RPS6KA1, SOX8, SOX9, KIFAP3, PDE8B, CDKL2, TLE2, PRKAB2, IGFBP5, PRKCB, FST, MAGI2, PRKCD, ARRDC3, ANK2, CARTPT, GEM, AR, CLDN4, S100A6, VOPP1, SPARCL1, ULK2, PGR, ROR2, PRKD1, GRB7, GRIA2, CSF1R, CHRNA3, CALCB, SDC4, RRAD, PDE1A, ITPR1, TNFRSF11A, PIK3R1, NTS, PRKCZ, C3, ARHGAP20, PENK, FGF20, CYTL1, …	1717	1161	16792	1.37305	0.0847707	0.0128982	0.012853
GOTERM_BP_DIRECT	GO:0042493~response to drug	56	2.71055	1.86e-05	ABCD3, HTR2B, HTR2A, AACS, AQP1, NPPC, PNP, CCND1, MDK, CDH1, DPYSL2, CASP3, TSPO, TIMP4, VAV3, HMGCS1, ITGA3, ITGA2, SORD, FOS, SFRP1, POR, GAL, SFRP2, CYP2E1, TOP1, CCNO, ABCB1, SEMA3C, RPN2, MGST1, LPL, PTN, ATP1A1, GRIN2A, OXCT1, MYO6, APOD, FYN, SNCA, MAP2K6, LYN, CBX7, BCHE, JUN, FZD3, TRPA1, SRD5A1, FABP3, ACTC1, PDE3A, LCN2, FOSB, GCLM, PAM, KCNK3	1717	304	16792	1.80155	0.0863319	0.0128982	0.012853
GOTERM_BP_DIRECT	GO:0086091~regulation of heart rate by cardiac conduction	14	0.677638	2.16e-05	KCNH2, JUP, KCNE3, KCND3, CACNA2D1, CAV1, KCNA5, ANK2, CACNB2, PKP2, CTNNA3, SCN3B, SCN4B, DSC2	1717	35	16792	3.91194	0.0994501	0.0130936	0.0130478
GOTERM_BP_DIRECT	GO:0001764~neuron migration	26	1.25847	4.29e-05	GPM6A, SEMA3A, NDNF, RELN, CHL1, NDN, FYN, MYH10, PRKG1, MARK1, FZD3, MEF2C, SEMA6A, ITGA3, DCDC2, PAX6, NR2F2, PHOX2B, DCLK1, NR4A2, PEX7, TUBB2B, CXCL12, DCX, FGF13, GAS6	1717	105	16792	2.42168	0.188131	0.0231569	0.0230759
GOTERM_BP_DIRECT	GO:0002576~platelet degranulation	25	1.21007	8.74e-05	CFD, LGALS3BP, SERPINA3, ORM1, SERPINA1, STXBP1, PROS1, PDGFA, APOH, FLNA, TIMP3, FGB, LYN, ACTN2, PCDH7, IGF1, F5, VEGFA, SELP, TF, F8, ALB, GAS6, VCL, PF4	1717	103	16792	2.37375	0.345961	0.0424569	0.0423084
GOTERM_BP_DIRECT	GO:0019233~sensory perception of pain	16	0.774443	0.00015	EDN1, TRPA1, NPY1R, NIPSNAP1, ADCYAP1, UCHL1, GRIN2A, EDNRB, NMU, PENK, SCN9A, BDKRB1, NDN, TAC1, HOXB8, SCN3B	1717	52	16792	3.00918	0.517912	0.0663249	0.0660929
GOTERM_BP_DIRECT	GO:0006936~muscle contraction	25	1.21007	0.000164	MYOM1, LMOD1, ACTG2, MYLK, GJC1, SGCA, CALD1, SCN7A, MYH11, TMOD1, STAC, TPM1, TMOD2, ITGA1, TACR2, SORBS1, ACTA2, DES, MYOT, SLMAP, SSPN, CRYAB, MYL9, SNTB1, VCL	1717	107	16792	2.28501	0.549979	0.066533	0.0663003
GOTERM_BP_DIRECT	GO:0006749~glutathione metabolic process	16	0.774443	0.000368	GSTK1, GSTM3, G6PD, CLIC4, CLIC3, GSTO2, GSR, MGST1, GSTT2, OPLAH, GGTLC1, ALDH5A1, ETHE1, GGTA1P, CLIC2, GSTM5	1717	56	16792	2.79424	0.832725	0.12075	0.120328
GOTERM_BP_DIRECT	GO:0050680~negative regulation of epithelial cell proliferation	16	0.774443	0.000368	CDKN1C, MEF2C, IL26, MAGED1, IFT172, PAX6, PTN, MCC, TGFBR3, IFT74, AR, SFRP1, SFRP2, MARVELD3, GPC3, SOX9	1717	56	16792	2.79424	0.832725	0.12075	0.120328
GOTERM_BP_DIRECT	GO:0050919~negative chemotaxis	12	0.580833	0.00038	SEMA5A, NRP2, EPHA7, SEMA6A, SEMA3C, SEMA3A, SEMA4B, SEMA3G, PDGFA, SEMA3E, SLIT2, EFNA5	1717	34	16792	3.45171	0.842015	0.12075	0.120328
GOTERM_BP_DIRECT	GO:0006954~inflammatory response	61	2.95257	0.000398	SERPINA3, ORM1, IL26, TRIL, LY75, F11R, CXCL3, CXCL5, PYCARD, SCN9A, CASP4, CCRL2, AOX1, BDKRB1, PLA2G4C, IL18, IL19, FOS, TPST1, GAL, IL1B, CHI3L1, PRKCQ, PRKD1, CHST4, SCG2, TNFRSF21, EPHA2, CSF1R, PTGFR, CCL11, PLGRKT, TNFRSF11A, LIAS, HDAC9, PRKCZ, C3, NLRP2, S1PR3, TSPAN2, TAC1, AOC3, LYN, CCL24, AFAP1L2, CCL22, CCL21, CCL20, TNFRSF10A, SELP, CXCL12, KRT16, PLP1, SDC1, PTX3, ACKR1, CDO1, BMP…	1717	379	16792	1.57407	0.855199	0.12075	0.120328
GOTERM_BP_DIRECT	GO:0003151~outflow tract morphogenesis	14	0.677638	0.000509	JUN, MEF2C, SEMA3C, NOG, NPY1R, ILK, ISL1, VEGFA, TGFBR3, CLDN5, SFRP2, SOX17, NEDD4, HEY2	1717	46	16792	2.97648	0.915812	0.139098	0.138611
GOTERM_BP_DIRECT	GO:0006816~calcium ion transport	19	0.919651	0.00052	RYR2, PRKCB, TRPC4, VDR, CACNA2D1, TRPC1, CAV1, ITPR1, PKD2, RYR3, BSPRY, CYSLTR1, PLN, NPY, CACHD1, NMUR2, FYN, KCNN4, RAMP1	1717	76	16792	2.44496	0.920226	0.139098	0.138611
GOTERM_BP_DIRECT	GO:0007517~muscle organ development	21	1.01646	0.000544	CHODL, UNC45B, CD164, MEF2C, TAGLN, EGR3, LAMA2, FHL1, IGF1, SGCE, SMTN, SGCD, SGCA, ITGA7, DMD, MKX, ITGB1BP2, CRYAB, BVES, EID2B, SGCG	1717	89	16792	2.3076	0.928894	0.139098	0.138611
GOTERM_BP_DIRECT	GO:0034329~cell junction assembly	7	0.338819	0.000605	VMP1, ILK, FLNA, FLNC, GRHL2, FERMT2, LIMS2	1717	12	16792	5.70491	0.947251	0.146532	0.14602
GOTERM_BP_DIRECT	GO:0007160~cell-matrix adhesion	21	1.01646	0.000633	FGB, COL17A1, ECM2, ITGA3, ITGA2, ITGA1, ILK, EPDR1, SORBS1, LYVE1, FBLN5, SGCE, TNN, ADAM9, ITGA7, ITGA6, MUC4, FREM1, FERMT2, VCL, JAM3	1717	90	16792	2.28196	0.953956	0.146532	0.14602
GOTERM_BP_DIRECT	GO:0090002~establishment of protein localization to plasma membrane	13	0.629235	0.000744	JUP, ACTN2, RDX, TTC7B, F11R, TSPAN15, CACNB2, TTC8, CDH1, PKP2, TSPAN5, PKP3, EZR	1717	42	16792	3.0271	0.973192	0.164441	0.163866
GOTERM_BP_DIRECT	GO:0035914~skeletal muscle cell differentiation	14	0.677638	0.000982	EGR1, EGR2, MEF2C, BTG2, HLF, FOS, PHOX2B, KLHL41, PLAGL1, SMYD1, SOX8, NUPR1, ASB2, ATF3	1717	49	16792	2.79424	0.991577	0.201285	0.200581
GOTERM_BP_DIRECT	GO:0001558~regulation of cell growth	19	0.919651	0.000994	NANOS1, IGFBP5, CRIM1, FAM107A, TMEM97, IL17RB, FBLN5, AGT, WISP2, SOCS2, CEACAM1, IGFBPL1, H2AFY2, NOV, NRG3, EPB41L3, AGTR1, PRKCQ, IGFBP6	1717	80	16792	2.32271	0.992039	0.201285	0.200581
GOTERM_BP_DIRECT	GO:0010811~positive regulation of cell-substrate adhesion	12	0.580833	0.00108852	VIT, SMOC2, ECM2, EGFL6, CCDC80, FOXF1, ITGA3, ABI3BP, ITGA6, NDNF, PTN, FBLN2	1717	38	16792	3.08837	0.994974	0.209537	0.208804
GOTERM_BP_DIRECT	GO:0001525~angiogenesis	39	1.88771	0.00112098	CLIC4, NRP2, NRXN1, NRXN3, PDGFA, NDNF, CIB1, HOXB13, MEOX2, SAT1, APOLD1, SOX17, FGF9, HEY1, CYP1B1, APOD, ZNF304, THSD7A, HOXA7, JAM3, VAV3, JUN, ANGPT1, FZD5, CAV1, C1GALT1, IL18, VEGFA, MEIS1, CEACAM1, NOV, HAND2, COL8A2, CSPG4, PRKD1, RAMP1, SCG2, NOX1, FGF10	1717	223	16792	1.71038	0.995708	0.209537	0.208804
GOTERM_BP_DIRECT	GO:0002931~response to ischemia	11	0.53243	0.00123495	EGR1, MEF2C, UCHL1, AIFM1, CAV1, PPIF, CIB1, NDNF, BVES, HK2, MAP2K6	1717	33	16792	3.25995	0.997535	0.222291	0.221514
GOTERM_BP_DIRECT	GO:0006739~NADP metabolic process	5	0.242014	0.00137597	G6PD, TP53I3, DCXR, FMO2, NOX1	1717	6	16792	8.14987	0.998759	0.227557	0.226761
GOTERM_BP_DIRECT	GO:0072659~protein localization to plasma membrane	16	0.774443	0.00139522	DPP10, STXBP1, ZDHHC23, ANK2, PRKCZ, DPP6, CDH1, SLMAP, EPB41L3, MAP7, FLNA, DCHS1, TNIK, FGF13, SCN3B, RAMP1	1717	63	16792	2.48377	0.99887	0.227557	0.226761
GOTERM_BP_DIRECT	GO:0060173~limb development	9	0.435624	0.00140467	SALL1, INTU, ZAK, IFT172, SMOC1, NOG, NR2F2, MEOX2, PAM	1717	23	16792	3.8269	0.998921	0.227557	0.226761
GOTERM_BP_DIRECT	GO:0003334~keratinocyte development	6	0.290416	0.0017969	IFT74, BCL11B, PALLD, SFN, FLNB, EXPH5	1717	10	16792	5.86791	0.99984	0.274482	0.273522
GOTERM_BP_DIRECT	GO:0032355~response to estradiol	20	0.968054	0.00187235	FOXA1, PTGFR, ARNT2, POSTN, ENDOG, IHH, PTN, NR2F2, TFPI, AREG, GHR, SOCS2, GJB2, IFI27, CCND1, CASP3, PENK, CRYAB, PAM, FGF10	1717	91	16792	2.14942	0.999889	0.274482	0.273522
GOTERM_BP_DIRECT	GO:0008360~regulation of cell shape	27	1.30687	0.00189421	CSF1R, CCL11, SH3KBP1, LPAR1, SEMA3E, PTN, EPB41L3, FYN, BVES, MYH10, WASF3, CCL24, MYO10, TPM1, RDX, PARVA, S100B, VEGFA, VIL1, RHOJ, CDC42EP3, ITGA7, PLEKHO1, RHOU, EZR, FERMT2, CDC42SE2	1717	140	16792	1.88611	0.9999	0.274482	0.273522
GOTERM_BP_DIRECT	GO:0045880~positive regulation of smoothened signaling pathway	9	0.435624	0.00192024	FOXA1, SFRP1, POR, INTU, FGF9, IFT172, IHH, GPC3, DCDC2	1717	24	16792	3.66744	0.999912	0.274482	0.273522
GOTERM_BP_DIRECT	GO:0007267~cell-cell signaling	42	2.03291	0.0021251	SEMA5A, IL26, SH3KBP1, IHH, PDGFA, TNFRSF11A, BARX1, AREG, CXCL5, PTHLH, WISP2, FGF9, FGF20, NDP, TAC1, INSL4, KLF10, CCL24, EDN1, FGFBP1, CCL22, CCL21, CCL20, GDF15, BDNF, IL18, CARTPT, AGT, AR, ADCYAP1, GJB2, GJB1, SFRP2, NOV, CEACAM6, IL7, IL1B, NMUR2, PGR, FGF13, CHST4, FGFR3	1717	254	16792	1.61714	0.999968	0.285745	0.284746
GOTERM_BP_DIRECT	GO:0051781~positive regulation of cell division	13	0.629235	0.00217543	MACC1, HTR2B, PDGFA, PTN, FGF2, THBS4, VEGFA, BTC, FGF7, FGF9, MDK, IL1B, PDGFC	1717	47	16792	2.70506	0.999975	0.285745	0.284746
GOTERM_BP_DIRECT	GO:0009267~cellular response to starvation	13	0.629235	0.00217543	KLF10, WNT2B, SRD5A1, CAV1, LRRK2, INHBB, CARTPT, SFRP1, RRAGD, ALB, PDK4, GAS6, DSC2	1717	47	16792	2.70506	0.999975	0.285745	0.284746
GOTERM_BP_DIRECT	GO:0090004~positive regulation of establishment of protein localization to plasma membrane	10	0.484027	0.00232455	VIL1, DPP10, PRKCI, ITGA3, NRXN1, CIB1, SORBS1, PIK3R1, EZR, EPHA2	1717	30	16792	3.25995	0.999988	0.297298	0.296258
GOTERM_BP_DIRECT	GO:0031175~neuron projection development	21	1.01646	0.00247581	LYN, LGI1, NLGN1, BTG2, MYOC, HDGFRP3, PTPRK, PPP1R9A, AREG, MANF, ADCYAP1, MAP2, CDH1, CLMN, NPY, NEDD4, CNTN1, EFHD1, NRTN, NCAM1, CNTN4	1717	100	16792	2.05377	0.999994	0.308524	0.307445
GOTERM_BP_DIRECT	GO:0070372~regulation of ERK1 and ERK2 cascade	9	0.435624	0.00257397	LYN, TGFBR3, CEACAM1, EPHA7, RRAS, ERBB2, FAM83D, ARHGEF5, EPHA2	1717	25	16792	3.52075	0.999996	0.312737	0.311643
GOTERM_BP_DIRECT	GO:0001658~branching involved in ureteric bud morphogenesis	12	0.580833	0.00264412	SALL1, GPC3, ILK, TCF21, DCHS1, FAT4, SOX9, PKD2, FGF2, GLI3, PBX1, HOXA11	1717	42	16792	2.79424	0.999997	0.313425	0.312328
GOTERM_BP_DIRECT	GO:0045766~positive regulation of angiogenesis	23	1.11326	0.00278623	SEMA5A, CCL24, PTGIS, CCL11, PRKCB, ANXA3, CMA1, HSPB1, FGF2, F3, ISL1, AQP1, VEGFA, C3, LRG1, SFRP2, RRAS, IL1B, CTSH, CYP1B1, CHI3L1, ZNF304, PRKD1	1717	115	16792	1.95597	0.999999	0.322406	0.321278
GOTERM_BP_DIRECT	GO:0042308~negative regulation of protein import into nucleus	5	0.242014	0.00295059	MDFIC, ANGPT1, PKIA, APOD, PKIG	1717	7	16792	6.98561	0.999999	0.325975	0.324835
GOTERM_BP_DIRECT	GO:0098911~regulation of ventricular cardiac muscle cell action potential	6	0.290416	0.00301829	RYR2, JUP, CAV1, PKP2, CTNNA3, DSC2	1717	11	16792	5.33446	1	0.325975	0.324835
GOTERM_BP_DIRECT	GO:2000178~negative regulation of neural precursor cell proliferation	6	0.290416	0.00301829	BTG2, ID2, ILK, PAX6, SPINT2, LIMS2	1717	11	16792	5.33446	1	0.325975	0.324835
GOTERM_BP_DIRECT	GO:0070374~positive regulation of ERK1 and ERK2 cascade	31	1.50048	0.00321774	CSF1R, NDRG4, CCL11, IL26, HTR2B, PDGFA, CIB1, PLA2G5, HMGCR, HTR2A, FGF2, PRKCZ, PYCARD, BMPER, PDGFC, FGF20, FGB, CCL24, JUN, CCL22, ANGPT1, CCL21, CCL20, VEGFA, ADCYAP1, ST5, HAND2, CHI3L1, GAS6, FGFR3, FGF10	1717	175	16792	1.73243	1	0.339962	0.338773
GOTERM_BP_DIRECT	GO:0007010~cytoskeleton organization	29	1.40368	0.00351095	CCL11, ZAK, SH3KBP1, ADD3, UGT8, ABLIM3, DPYSL2, PAK6, DMD, SOX9, CTNNA2, PDZD8, WASF3, MARK1, CAP2, CCL24, SVIL, PRKCI, SEMA6A, TPM1, KRT13, ANK2, ARHGAP10, TUBB2B, DES, KRT16, PALLD, RHOU, TNIK	1717	161	16792	1.76159	1	0.347784	0.346567
GOTERM_BP_DIRECT	GO:0001938~positive regulation of endothelial cell proliferation	16	0.774443	0.00361382	SEMA5A, CCL24, JUN, NRP2, EGR3, CCL11, CAV2, HTR2B, FGF2, F3, THBS4, VEGFA, LRG1, CXCL12, PRKD1, SCG2	1717	69	16792	2.26779	1	0.347784	0.346567
GOTERM_BP_DIRECT	GO:0006940~regulation of smooth muscle contraction	7	0.338819	0.00366105	CHRM2, CNN1, CHRNA3, CAV1, NMU, NMUR2, ATP1A2	1717	16	16792	4.27868	1	0.347784	0.346567
GOTERM_BP_DIRECT	GO:0050873~brown fat cell differentiation	10	0.484027	0.00377968	CEBPA, ARL4A, RGS2, FABP4, LRG1, LAMB3, MB, BNIP3, ZNF516, ITGA6	1717	32	16792	3.0562	1	0.347784	0.346567
GOTERM_BP_DIRECT	GO:0061024~membrane organization	10	0.484027	0.00377968	SGCE, PRKCI, BAIAP2L2, SGCD, TBC1D4, SGCA, DHCR24, SFN, PMP2, SGCG	1717	32	16792	3.0562	1	0.347784	0.346567
GOTERM_BP_DIRECT	GO:0006869~lipid transport	17	0.822846	0.0037904	STARD3, CETP, OSBPL6, CHKA, ABCA6, OSBPL3, SPNS2, ABCA9, ANO9, NME4, VLDLR, APOLD1, TSPO, APOD, OSBPL1A, APOL1, PLTP	1717	76	16792	2.1876	1	0.347784	0.346567
GOTERM_BP_DIRECT	GO:0010506~regulation of autophagy	13	0.629235	0.0037927	MTCL1, LRRK2, ITPR1, HSPB1, WDR24, VMP1, PYCARD, RRAGB, LAMP3, RRAGD, ULK2, FBXL2, BOK	1717	50	16792	2.54276	1	0.347784	0.346567
GOTERM_BP_DIRECT	GO:0019731~antibacterial humoral response	12	0.580833	0.00391718	SEMG2, SLPI, NPY, HIST1H2BK, SEMG1, HIST1H2BE, DEFB1, H2BFS, VIP, TAC1, HIST1H2BD, HIST1H2BC	1717	44	16792	2.66723	1	0.347794	0.346577
GOTERM_BP_DIRECT	GO:0071603~endothelial cell-cell adhesion	4	0.193611	0.00393594	JUP, NOV, CYP1B1, THBS4	1717	4	16792	9.77985	1	0.347794	0.346577
GOTERM_BP_DIRECT	GO:0098869~cellular oxidant detoxification	16	0.774443	0.00417437	GSTK1, SRXN1, GSTO2, NXN, TXNL1, GSR, MGST1, HP, MGST2, GPX7, FAM213A, PRDX4, IYD, ALB, CLIC2, DUOX2	1717	70	16792	2.23539	1	0.35592	0.354675
GOTERM_BP_DIRECT	GO:0030855~epithelial cell differentiation	16	0.774443	0.00417437	GSTK1, EHF, TAGLN, ANXA4, SPINK5, TCF21, F11R, BARX1, CNN3, VEGFA, VIL1, PTER, DMBT1, CASP6, KRT14, TAGLN2	1717	70	16792	2.23539	1	0.35592	0.354675
GOTERM_BP_DIRECT	GO:0032496~response to lipopolysaccharide	29	1.40368	0.00458052	PTGFR, PALM3, MGST1, MGST2, TNFRSF11A, LIAS, CXCL3, CXCL5, TRIM6, CASP3, PENK, BDKRB1, CTSG, TAC1, TIMP4, SNCA, JUN, EDN1, GCH1, KCNJ8, TNFRSF10A, FOS, DCN, SELP, SLPI, PELI1, TNFRSF21, PF4, FGF10	1717	164	16792	1.72936	1	0.376659	0.375342
GOTERM_BP_DIRECT	GO:0060048~cardiac muscle contraction	12	0.580833	0.00471515	KCNH2, RYR2, ACTC1, PPP1R13L, TPM1, CASQ2, DMD, ATP1A2, ATP1A1, SCN3B, SCN4B, MAP2K6	1717	45	16792	2.60796	1	0.376659	0.375342
GOTERM_BP_DIRECT	GO:0001755~neural crest cell migration	12	0.580833	0.00471515	SEMA5A, SEMA6A, EDNRB, SEMA3C, SEMA3A, SEMA4B, SEMA3G, HTR2B, NRTN, SEMA3E, SOX8, ISL1	1717	45	16792	2.60796	1	0.376659	0.375342
GOTERM_BP_DIRECT	GO:0034394~protein localization to cell surface	8	0.387222	0.00492389	FGF7, ANGPT1, FLNA, ANK2, PTPRK, FBLN5, VCL, FGF10	1717	22	16792	3.55631	1	0.376659	0.375342
GOTERM_BP_DIRECT	GO:0071542~dopaminergic neuron differentiation	8	0.387222	0.00492389	NR4A2, FOXA1, SFRP1, RSPO2, PHOX2B, MANF, FOXA2, VEGFA	1717	22	16792	3.55631	1	0.376659	0.375342
GOTERM_BP_DIRECT	GO:0014066~regulation of phosphatidylinositol 3-kinase signaling	17	0.822846	0.00495518	IRS1, PDGFA, IRS2, PIK3R1, PTPN13, FGF2, BTC, FGF7, CEACAM1, FGF9, ERBB2, FGF20, FYN, FBXL2, FGFR3, IER3, FGF10	1717	78	16792	2.13151	1	0.376659	0.375342
GOTERM_BP_DIRECT	GO:0008544~epidermis development	18	0.871249	0.00503643	COL17A1, SPRR3, LAMB3, SATB1, IFT172, LAMC2, HOXB13, OVOL1, GRHL2, AGPAT2, PTHLH, EDAR, FGF7, KRT16, KRT14, SPRR1A, SPRR2B, SPRR1B	1717	85	16792	2.07103	1	0.376659	0.375342
GOTERM_BP_DIRECT	GO:0060749~mammary gland alveolus development	7	0.338819	0.00517436	AR, CCND1, ID2, TNFRSF11A, AREG, HOXA5, VEGFA	1717	17	16792	4.027	1	0.376659	0.375342
GOTERM_BP_DIRECT	GO:0007156~homophilic cell adhesion via plasma membrane adhesion molecules	28	1.35528	0.00523552	ROBO2, CLSTN2, AMIGO1, AMIGO2, PCDH18, CDH1, ME2, MPZL2, CADM1, PCDH9, SMAGP, CADM2, PCDH7, PCDHB15, PCDHB14, SDK1, CEACAM1, CDH10, PCDHB16, PCDHB6, CDHR3, PCDHB5, DCHS1, FAT3, FAT4, DSC2, PCDHB7, CDH19	1717	158	16792	1.73314	1	0.376659	0.375342
GOTERM_BP_DIRECT	GO:0008344~adult locomotory behavior	13	0.629235	0.0053268	TMOD1, CSTB, PBX3, ATP1A2, DNM1, NR4A2, CXCL12, CHL1, ID2, SLITRK6, HOXB8, FOXA2, SNCA	1717	52	16792	2.44496	1	0.376659	0.375342
GOTERM_BP_DIRECT	GO:0030178~negative regulation of Wnt signaling pathway	13	0.629235	0.0053268	RNF43, NXN, BARX1, APCDD1, CXXC4, DKK4, SFRP1, SFRP2, FGF9, CCND1, FRZB, WIF1, DACT3	1717	52	16792	2.44496	1	0.376659	0.375342
GOTERM_BP_DIRECT	GO:0048671~negative regulation of collateral sprouting	5	0.242014	0.00542513	EPHA7, BCL11A, ULK2, FGF13, RGMA	1717	8	16792	6.11241	1	0.376659	0.375342
GOTERM_BP_DIRECT	GO:0050966~detection of mechanical stimulus involved in sensory perception of pain	5	0.242014	0.00542513	TRPA1, KCNA1, ITGA2, FYN, HTR2A	1717	8	16792	6.11241	1	0.376659	0.375342
GOTERM_BP_DIRECT	GO:0007420~brain development	32	1.54889	0.00590513	ROBO2, NDRG4, ARL6, CTTNBP2, IFT172, ROGDI, IRS2, SLC7A11, PCDH18, RELN, OXCT1, DPYSL2, APOD, TSPAN2, CKB, MACROD2, BOK, SYT4, ARNT2, EGR2, EPHA7, SYT1, HMGCS1, CADM1, SHROOM2, SMARCA1, EML1, GRHL2, H2AFY2, B3GNT5, CNTN4, KCNK3	1717	190	16792	1.64713	1	0.40421	0.402797
GOTERM_BP_DIRECT	GO:0007219~Notch signaling pathway	22	1.06486	0.0060131	FOXA1, CEBPA, GOT1, IFT172, ANXA4, NOTCH2NL, KCNA5, DTX4, IFT74, NEURL1B, PTP4A3, PLN, HEY1, MDK, HEY2, CNTN1, S1PR3, SOX9, SUSD5, FAT4, ZNF423, TIMP4	1717	115	16792	1.87093	1	0.405885	0.404465
GOTERM_BP_DIRECT	GO:0016337~single organismal cell-cell adhesion	20	0.968054	0.00629456	CRISP2, TENM2, NEGR1, JUP, TTYH1, COL14A1, FOXF1, VMP1, CDH1, CDH10, PKP2, COL8A2, ITGA6, CTNNA3, SOX9, PKP3, CTNNA2, JAM2, LIMS2, MPZL2	1717	101	16792	1.9366	1	0.419062	0.417597
GOTERM_BP_DIRECT	GO:0007193~adenylate cyclase-inhibiting G-protein coupled receptor signaling pathway	12	0.580833	0.00669426	P2RY12, GNAZ, GABBR1, GNAL, GPR37, NPR3, NPY1R, HTR2B, LPAR1, S1PR3, HTR2A, GNAI1	1717	47	16792	2.49698	1	0.43965	0.438112
GOTERM_BP_DIRECT	GO:0070527~platelet aggregation	11	0.53243	0.00703195	FGB, P2RY12, CSRP1, STXBP1, HSPB1, ILK, FLNA, SLC7A11, GAS6, MYL9, VCL	1717	41	16792	2.62386	1	0.448109	0.446541
GOTERM_BP_DIRECT	GO:0006957~complement activation, alternative pathway	6	0.290416	0.00706373	CFD, C3, CFH, C7, VSIG4, CFB	1717	13	16792	4.51378	1	0.448109	0.446541
GOTERM_BP_DIRECT	GO:0048557~embryonic digestive tract morphogenesis	7	0.338819	0.00709966	FOXF1, SIX2, ID2, RBPMS2, TCF21, GLI3, FGF10	1717	18	16792	3.80327	1	0.448109	0.446541
GOTERM_BP_DIRECT	GO:0008285~negative regulation of cell proliferation	57	2.75895	0.0076593	BTG2, TGFB1I1, NRK, CIB1, PTPRK, PKD2, FGF2, RERG, GLI3, NPPC, ADAMTS1, TRIM24, CYP1B1, KIFAP3, ADAMTS8, SOX7, HIST1H2AC, KLF10, MYOCD, FGFBP1, MAGI2, ITGA1, LDOC1, AR, SFRP1, SFRP2, IL1B, PKP2, ROR2, IRF6, CEBPA, CSF1R, DPT, NDRG1, PTHLH, CLMN, FRZB, MXI1, NDN, SH3BP4, IGFBP6, S100A11, LYN, CGREF1, CD164, BCHE, JUN, BCL11B, FZD5, VDR, ZBTB16, DHCR24, PODN, PHOX2B, FABP3, DFNA5, FGF10	1717	396	16792	1.40771	1	0.477233	0.475564
GOTERM_BP_DIRECT	GO:0010976~positive regulation of neuron projection development	18	0.871249	0.00809652	LYN, PRKCI, NDRG4, NEGR1, BCL11A, ITGA3, MAGI2, STMN2, NDNF, PTN, RGMA, ADCYAP1, RELN, FEZ1, CNTN1, FYN, DMD, PRKD1	1717	89	16792	1.97795	1	0.495498	0.493765
GOTERM_BP_DIRECT	GO:0006813~potassium ion transport	17	0.822846	0.00815635	KCNK5, SLC12A2, KCNK6, KCNJ8, KCND3, KCNA1, ATP1A2, KCNA5, AQP1, KCNMB1, KCNS3, KCNMA1, KCNMB4, KCNN2, KCNN4, KCNK3, SLC12A8	1717	82	16792	2.02753	1	0.495498	0.493765
GOTERM_BP_DIRECT	GO:0001654~eye development	9	0.435624	0.0087846	SALL2, FGF9, SCO2, SMOC1, MAB21L2, PAX6, BMPR1B, MEIS2, CHRDL1	1717	30	16792	2.93395	1	0.513747	0.51195
GOTERM_BP_DIRECT	GO:0046326~positive regulation of glucose import	9	0.435624	0.0087846	PRKCI, C1QTNF2, IRS1, GPC3, IRS2, SORBS1, IGF1, PIK3R1, PRKCZ	1717	30	16792	2.93395	1	0.513747	0.51195
GOTERM_BP_DIRECT	GO:0030449~regulation of complement activation	9	0.435624	0.0087846	C3, CFH, C7, PROS1, C4BPA, C4BPB, CD46, CD55, CFB	1717	30	16792	2.93395	1	0.513747	0.51195
GOTERM_BP_DIRECT	GO:0071504~cellular response to heparin	4	0.193611	0.009091	EGR1, SFRP1, SOX9, SLIT2	1717	5	16792	7.82388	1	0.513747	0.51195
GOTERM_BP_DIRECT	GO:2001028~positive regulation of endothelial cell chemotaxis	4	0.193611	0.009091	SEMA5A, HSPB1, PRKD1, MET	1717	5	16792	7.82388	1	0.513747	0.51195
GOTERM_BP_DIRECT	GO:0090131~mesenchyme migration	4	0.193611	0.009091	ACTA2, ACTC1, FOXF1, ACTG2	1717	5	16792	7.82388	1	0.513747	0.51195
GOTERM_BP_DIRECT	GO:0090190~positive regulation of branching involved in ureteric bud morphogenesis	7	0.338819	0.00949371	WNT2B, MAGED1, NOG, SOX8, SOX9, AGT, VEGFA	1717	19	16792	3.6031	1	0.518421	0.516607
GOTERM_BP_DIRECT	GO:0010881~regulation of cardiac muscle contraction by regulation of the release of sequestered calcium ion	7	0.338819	0.00949371	RYR2, PLN, CASQ2, DMD, ATP1A2, ANK2, CLIC2	1717	19	16792	3.6031	1	0.518421	0.516607
GOTERM_BP_DIRECT	GO:0032332~positive regulation of chondrocyte differentiation	7	0.338819	0.00949371	POR, ZBTB16, IHH, SOX9, BMPR1B, GLI3, HOXA11	1717	19	16792	3.6031	1	0.518421	0.516607
GOTERM_BP_DIRECT	GO:0042733~embryonic digit morphogenesis	13	0.629235	0.00984921	INTU, ZAK, ZBTB16, NOG, IHH, GRHL2, GLI3, HOXA11, SFRP2, SALL1, HAND2, FLVCR1, ROR2	1717	56	16792	2.27032	1	0.526945	0.525102
GOTERM_BP_DIRECT	GO:0007409~axonogenesis	19	0.919651	0.00986666	ECM2, ATL1, AMIGO1, OMD, KERA, PRELP, S100B, PARD6B, LRFN5, TNN, OGN, S100A6, SLITRK6, SLITRK5, ULK2, LRRN1, CNTN4, CTNNA2, NEFH	1717	98	16792	1.89609	1	0.526945	0.525102
GOTERM_BP_DIRECT	GO:0003382~epithelial cell morphogenesis	6	0.290416	0.0100755	AR, BCL11B, RILPL1, PALLD, FLNB, GRHL2	1717	14	16792	4.19136	1	0.532248	0.530386
GOTERM_BP_DIRECT	GO:0048813~dendrite morphogenesis	10	0.484027	0.0105274	MAP2, SEMA3A, SDC2, DCX, ELAVL4, SLITRK5, FYN, CTNNA2, VLDLR, DCLK1	1717	37	16792	2.6432	1	0.541548	0.539654
GOTERM_BP_DIRECT	GO:0034612~response to tumor necrosis factor	8	0.387222	0.0105745	ENDOG, GCH1, CASP3, GSS, ADAM9, CHI3L1, TNFRSF11A, CXCL16	1717	25	16792	3.12955	1	0.541548	0.539654
GOTERM_BP_DIRECT	GO:0048015~phosphatidylinositol-mediated signaling	20	0.968054	0.0105858	CSF1R, IRS1, NPR3, PDGFA, IRS2, PIK3R1, IGF1, FGF2, BTC, GPR143, FGF7, FGF9, ERBB2, FGF20, FYN, CA8, EZR, FGFR3, PIRT, FGF10	1717	106	16792	1.84525	1	0.541548	0.539654
GOTERM_BP_DIRECT	GO:0071805~potassium ion transmembrane transport	22	1.06486	0.010748	KCNK5, P2RY12, KCNH2, KCNK6, KCNE3, KCNB1, KCNE4, KCNA1, KCNA5, PKD2, AQP1, KCNT2, SLC9A7, KCNMB1, KCNS3, KCNMA1, KCNMB4, KCNN2, CNGA3, KCNN3, KCNN4, KCNK3	1717	121	16792	1.77815	1	0.541852	0.539957
GOTERM_BP_DIRECT	GO:0007157~heterophilic cell-cell adhesion via plasma membrane cell adhesion molecules	12	0.580833	0.0108147	SELP, CD164, NLGN1, TENM2, CADM1, CADM2, SMAGP, NRXN1, AMIGO1, AMIGO2, DCHS1, FAT4	1717	50	16792	2.34716	1	0.541852	0.539957
GOTERM_BP_DIRECT	GO:0009636~response to toxic substance	17	0.822846	0.0115009	LYN, PON3, CHKA, SLC6A14, AHR, SLC7A11, FOS, BPHL, INMT, AIFM1, CDH1, PENK, SCN9A, CYP1B1, NEFL, SDC1, NUPR1	1717	85	16792	1.95597	1	0.570349	0.568354
GOTERM_BP_DIRECT	GO:0050900~leukocyte migration	22	1.06486	0.0117694	LYN, GRB7, ANGPT1, MMP1, ITGA3, CAV1, PROS1, SLC7A11, PIK3R1, F11R, L1CAM, SELP, CEACAM1, NRAS, PROC, CEACAM6, FYN, ITGA6, GAS6, JAM2, CD177, JAM3	1717	122	16792	1.76358	1	0.577772	0.575751
GOTERM_BP_DIRECT	GO:0042474~middle ear morphogenesis	7	0.338819	0.0124115	EDN1, SIX2, TSHZ1, INSIG1, NOG, HOXA2, NKX3-2	1717	20	16792	3.42295	1	0.587606	0.585551
GOTERM_BP_DIRECT	GO:0035584~calcium-mediated signaling using intracellular calcium source	7	0.338819	0.0124115	SELP, RYR2, PTGFR, GPR143, TENM2, CCL20, DEFB1	1717	20	16792	3.42295	1	0.587606	0.585551
GOTERM_BP_DIRECT	GO:0001657~ureteric bud development	10	0.484027	0.0125743	ROBO2, SFRP1, SALL1, SDC4, BMPER, EPCAM, SMAD9, SDC1, TCF21, SLIT2	1717	38	16792	2.57364	1	0.587606	0.585551
GOTERM_BP_DIRECT	GO:0006695~cholesterol biosynthetic process	10	0.484027	0.0125743	G6PD, PRKAA2, HMGCS1, INSIG1, MSMO1, DHCR24, HMGCR, DHCR7, CFTR, FDFT1	1717	38	16792	2.57364	1	0.587606	0.585551
GOTERM_BP_DIRECT	GO:0030522~intracellular receptor signaling pathway	10	0.484027	0.0125743	NR4A2, AR, THRB, NR4A3, NR2F1, NR1H3, NR1D2, NR2F2, AHR, DCBLD2	1717	38	16792	2.57364	1	0.587606	0.585551
GOTERM_BP_DIRECT	GO:0051592~response to calcium ion	13	0.629235	0.013012	FGB, TRPC1, CAV1, AQP3, CCND1, S100A16, NEDD4, KCNMA1, PENK, SDC1, ADAM9, SLC25A12, SLC25A13	1717	58	16792	2.19204	1	0.601508	0.599404
GOTERM_BP_DIRECT	GO:0008217~regulation of blood pressure	14	0.677638	0.0132159	GUCY1A3, EDN1, GCH1, ACSM3, NPR3, NPY1R, ATP1A2, ATP1A1, AGT, ACTA2, EDNRB, NPY, TAC1, NOX1	1717	65	16792	2.10643	1	0.601508	0.599404
GOTERM_BP_DIRECT	GO:0043267~negative regulation of potassium ion transport	5	0.242014	0.0137696	ADCYAP1, ACTN2, CASQ2, KCNA5, HTR2A	1717	10	16792	4.88992	1	0.601508	0.599404
GOTERM_BP_DIRECT	GO:0061564~axon development	5	0.242014	0.0137696	GAP43, PLP1, NEFL, TSPAN2, NEFH	1717	10	16792	4.88992	1	0.601508	0.599404
GOTERM_BP_DIRECT	GO:0043117~positive regulation of vascular permeability	5	0.242014	0.0137696	PTP4A3, PDE2A, TACR2, PDE3A, VEGFA	1717	10	16792	4.88992	1	0.601508	0.599404
GOTERM_BP_DIRECT	GO:0008347~glial cell migration	5	0.242014	0.0137696	P2RY12, EPHA4, TSPO, NDN, CSPG4	1717	10	16792	4.88992	1	0.601508	0.599404
GOTERM_BP_DIRECT	GO:0001953~negative regulation of cell-matrix adhesion	6	0.290416	0.0138619	POSTN, MYOC, CASK, SEMA3E, PIK3R1, HOXA7	1717	15	16792	3.91194	1	0.601508	0.599404
GOTERM_BP_DIRECT	GO:0045725~positive regulation of glycogen biosynthetic process	6	0.290416	0.0138619	EPM2AIP1, C1QTNF2, IRS1, IRS2, SORBS1, IGF1	1717	15	16792	3.91194	1	0.601508	0.599404
GOTERM_BP_DIRECT	GO:0009952~anterior/posterior pattern specification	16	0.774443	0.0146232	BTG2, TSHZ1, ZBTB16, NR2F2, BARX1, GLI3, PBX1, HOXA11, VANGL2, HOXC4, HOXA2, HOXB2, HOXA7, HOXB8, HOXA5, HOXB6	1717	80	16792	1.95597	1	0.628927	0.626727
GOTERM_BP_DIRECT	GO:0030336~negative regulation of cell migration	18	0.871249	0.0153055	CLIC4, IGFBP5, TPM1, MAGI2, NOG, PTN, PTPRK, PODN, SRGAP2C, SFRP1, SFRP2, RRAS, KRT16, PKP2, CYP1B1, SLIT2, FAM60A, VCL	1717	95	16792	1.85302	1	0.652499	0.650216
GOTERM_BP_DIRECT	GO:0055114~oxidation-reduction process	78	3.77541	0.0156762	DHRS13, STEAP3, STEAP4, SRXN1, GLDC, MSMO1, PLOD2, AIFM1, TDO2, AIFM2, IYD, CYP1B1, AOX1, SH3BGRL3, ME2, AASS, GSTK1, G6PD, PTGIS, GSTO2, DCXR, DIO1, DHDH, SORD, GPX7, PIPOX, CYP39A1, ALDH1A3, HPDL, POR, F8, SCO2, ASPHD1, FAR1, CYP2E1, STEAP2, KDM7A, TSTA3, NXN, FAXDC2, TYRP1, MGST1, GMPR, HMGCR, LDHB, CYP2B6, FAM213B, PRDX4, CRYM, DUOX2, VAT1L, FDFT1, SNCA, CBR3, AOC3, EGLN3, NOS2, SRD5A1, TXNL1…	1717	592	16792	1.28856	1	0.657749	0.655448
GOTERM_BP_DIRECT	GO:0001666~response to hypoxia	28	1.35528	0.0158044	RYR2, ITPR1, KCNA5, PLOD2, APOLD1, PDLIM1, NPPC, MB, CASP3, PENK, EGR1, ARNT2, POSTN, EGLN3, MYOCD, NOS2, PRKCB, BNIP3, CAV1, ITGA2, SOD3, VEGFA, NR4A2, TGFBR3, CXCL12, KCNMA1, CRYAB, PAM	1717	172	16792	1.59207	1	0.657749	0.655448
GOTERM_BP_DIRECT	GO:0071526~semaphorin-plexin signaling pathway	9	0.435624	0.0158347	SEMA5A, SEMA6A, SEMA3C, SEMA3A, SEMA4B, SEMA3G, FLNA, SEMA3E, MET	1717	33	16792	2.66723	1	0.657749	0.655448
GOTERM_BP_DIRECT	GO:0086073~bundle of His cell-Purkinje myocyte adhesion involved in cell communication	4	0.193611	0.016806	JUP, PKP2, CTNNA3, DSC2	1717	6	16792	6.5199	1	0.673112	0.670758
GOTERM_BP_DIRECT	GO:0009404~toxin metabolic process	4	0.193611	0.016806	AS3MT, CYP1B1, FMO2, PAM	1717	6	16792	6.5199	1	0.673112	0.670758
GOTERM_BP_DIRECT	GO:0023041~neuronal signal transduction	4	0.193611	0.016806	OLFM1, NLGN1, NRXN1, KCNA1	1717	6	16792	6.5199	1	0.673112	0.670758
GOTERM_BP_DIRECT	GO:0006952~defense response	14	0.677638	0.0168801	COLEC12, HCP5, CRISP3, HLA-B, HP, INHBB, LILRB5, IL17RB, CYSLTR1, CLEC1A, CXCL12, ACKR1, KCNN4, SOCS6	1717	67	16792	2.04355	1	0.673112	0.670758
GOTERM_BP_DIRECT	GO:0050679~positive regulation of epithelial cell proliferation	13	0.629235	0.0168971	NOG, IHH, IGF1, VEGFA, FGF7, SFRP1, NR4A3, FGF9, ERBB2, ZNF304, SOX9, STOX1, FGF10	1717	60	16792	2.11897	1	0.673112	0.670758
GOTERM_BP_DIRECT	GO:0006885~regulation of pH	6	0.290416	0.0184987	EDN1, EDNRB, SLC9A7, PDK4, SLC26A4, CLCN3	1717	16	16792	3.66744	1	0.726567	0.724026
GOTERM_BP_DIRECT	GO:0032956~regulation of actin cytoskeleton organization	11	0.53243	0.0185379	VANGL2, PRKCD, DIXDC1, PDGFA, ILK, SH3BGRL3, EZR, EFNA5, PAM, ARHGEF5, GPM6B	1717	47	16792	2.2889	1	0.726567	0.724026
GOTERM_BP_DIRECT	GO:0043588~skin development	9	0.435624	0.0189022	JUP, GJB3, ITGA3, ARRDC3, PDGFA, SLITRK5, DHCR24, ITGA6, OVOL1	1717	34	16792	2.58878	1	0.726684	0.724142
GOTERM_BP_DIRECT	GO:0048146~positive regulation of fibroblast proliferation	12	0.580833	0.0190268	BTC, JUN, PDGFC, S100A6, PDGFA, FBLN1, IGF1, GAS6, AGT, AQP1, DDR2, FGF10	1717	54	16792	2.1733	1	0.726684	0.724142
GOTERM_BP_DIRECT	GO:0001933~negative regulation of protein phosphorylation	13	0.629235	0.019139	LYN, WWTR1, PRNP, ANGPT1, LRRK2, FAM129A, FBLN1, CIB1, PAX6, MYADM, BDKRB1, SLIT2, SNCA	1717	61	16792	2.08423	1	0.726684	0.724142
GOTERM_BP_DIRECT	GO:0007416~synapse assembly	13	0.629235	0.019139	GPM6A, NLGN1, FZD5, BDNF, NRXN1, NRXN3, PCDHB14, SDK1, CDH1, PCDHB16, PCDHB6, SLITRK6, PCDHB5	1717	61	16792	2.08423	1	0.726684	0.724142
GOTERM_BP_DIRECT	GO:0016339~calcium-dependent cell-cell adhesion via plasma membrane cell adhesion molecules	8	0.387222	0.0198805	NLGN1, NRXN1, PCDHB16, PCDHB6, PCDHB5, PCDHB14, DCHS1, ME2	1717	28	16792	2.79424	1	0.731681	0.729121
GOTERM_BP_DIRECT	GO:0021983~pituitary gland development	8	0.387222	0.0198805	ADCYAP1, SALL1, CDH1, SRD5A1, NOG, PAX6, ISL1, FGF10	1717	28	16792	2.79424	1	0.731681	0.729121
GOTERM_BP_DIRECT	GO:0009314~response to radiation	8	0.387222	0.0198805	JUN, CXCL12, CCL11, ZAK, PENK, KRT13, TNFRSF11A, F11R	1717	28	16792	2.79424	1	0.731681	0.729121
GOTERM_BP_DIRECT	GO:0045332~phospholipid translocation	7	0.338819	0.0200234	ATP8B4, ABCB1, ATP8B2, ATP10D, ATP10B, ATP11B, KCNN4	1717	22	16792	3.11177	1	0.731681	0.729121
GOTERM_BP_DIRECT	GO:1901687~glutathione derivative biosynthetic process	7	0.338819	0.0200234	GSTK1, GSTM3, HPGDS, GSTO2, MGST1, MGST2, GSTM5	1717	22	16792	3.11177	1	0.731681	0.729121
GOTERM_BP_DIRECT	GO:0051965~positive regulation of synapse assembly	13	0.629235	0.0215956	NLGN1, BHLHB9, LRRN3, CLSTN2, BDNF, NRXN1, AMIGO1, AMIGO2, NRXN3, EFNA5, SLITRK6, SLITRK5, LRRN1	1717	62	16792	2.05061	1	0.783244	0.780504
GOTERM_BP_DIRECT	GO:0051897~positive regulation of protein kinase B signaling	16	0.774443	0.0222363	SEMA5A, IGFBP5, MYOC, F10, ANGPT1, CCL21, IL26, IL18, PDGFA, ILK, FGF2, F3, CHI3L1, GAS6, STOX1, TSPYL5	1717	84	16792	1.86283	1	0.793863	0.791086
GOTERM_BP_DIRECT	GO:0050918~positive chemotaxis	9	0.435624	0.0223713	SEMA5A, FGF7, CXCL12, ANGPT1, SCG2, FGF2, MET, VEGFA, FGF10	1717	35	16792	2.51482	1	0.793863	0.791086
GOTERM_BP_DIRECT	GO:0007229~integrin-mediated signaling pathway	18	0.871249	0.0223784	VAV3, ADAMDEC1, ITGA3, ITGA2, ITGA1, ILK, FBLN1, DAB2, FUT8, CEACAM1, ADAMTS1, PLP1, ADAM9, ITGA7, ITGA6, ZNF304, PRKD1, FERMT2	1717	99	16792	1.77815	1	0.793863	0.791086
GOTERM_BP_DIRECT	GO:0030203~glycosaminoglycan metabolic process	8	0.387222	0.0239591	CHST9, SDC4, SDC2, GPC3, SDC1, CSPG4, GPC4, DCN	1717	29	16792	2.69789	1	0.834895	0.831975
GOTERM_BP_DIRECT	GO:0048265~response to pain	6	0.290416	0.0240505	RELN, EDNRB, GCH1, TRPA1, NMUR2, TAC1	1717	17	16792	3.45171	1	0.834895	0.831975
GOTERM_BP_DIRECT	GO:0030224~monocyte differentiation	6	0.290416	0.0240505	CSF1R, MEF2C, JUN, PDE2A, PIR, VEGFA	1717	17	16792	3.45171	1	0.834895	0.831975
GOTERM_BP_DIRECT	GO:1903779~regulation of cardiac conduction	12	0.580833	0.0245422	NPPC, RYR2, PLN, TRPC1, ITPR1, ATP2B4, CASQ2, FXYD6, ATP1A2, ATP1A1, AGT, RYR3	1717	56	16792	2.09568	1	0.845922	0.842963
GOTERM_BP_DIRECT	GO:0000122~negative regulation of transcription from RNA polymerase II promoter	91	4.40465	0.0250995	CDKN1C, FOXA1, BTG2, TENM2, THRB, ZBTB20, TCF21, VLDLR, GLI3, BACH2, ZFP36, SALL1, EDNRB, SALL2, HEY1, SOX17, FGF9, CCND1, PPP1R13L, TRPS1, ZNF280B, ZNF649, HEY2, WWC3, HOXA2, HOXA7, NKX3-2, HIST1H1C, KLF10, LEFTY1, MYOCD, MEF2C, EDN1, PEG3, FST, NOG, PAX6, OVOL1, HCFC2, ISL1, FOXP2, ETV7, EID1, IFI27, IRF7, AHRR, IRF8, EZR, ZFPM2, ATF3, CEBPA, TSHZ3, SATB1, TSHZ1, TSHZ2, HDAC9, GLIS2, DNAJB5, TC…	1717	720	16792	1.23606	1	0.85904	0.856035
GOTERM_BP_DIRECT	GO:0071347~cellular response to interleukin-1	14	0.677638	0.0264508	FGB, CCL24, EDN1, PTGIS, CCL11, CCL22, CCL21, CCL20, TFPI, PYCARD, SFRP1, LCN2, CHI3L1, SOX9	1717	71	16792	1.92842	1	0.885065	0.881969
GOTERM_BP_DIRECT	GO:0007218~neuropeptide signaling pathway	18	0.871249	0.0267329	NPFFR2, GRP, NPY1R, SORCS1, CARTPT, ADCYAP1, GPR143, CYSLTR1, GAL, GLRB, NPY, NMU, PENK, SCG5, CPE, NMUR2, TAC3, TAC1	1717	101	16792	1.74294	1	0.885065	0.881969
GOTERM_BP_DIRECT	GO:0043524~negative regulation of neuron apoptotic process	22	1.06486	0.0268005	GABRB2, JUN, MEF2C, PRKCI, BTG2, BHLHB9, ANGPT1, WFS1, BDNF, STXBP1, ILK, NDNF, ISL1, NR4A2, NR4A3, MDK, CHL1, FGF20, NEFL, FYN, GCLM, SNCA	1717	132	16792	1.62997	1	0.885065	0.881969
GOTERM_BP_DIRECT	GO:0016477~cell migration	27	1.30687	0.0271893	SDC4, SH3KBP1, SDC2, PTPRK, PRKCZ, FUT8, MDK, TNN, SIX2, BDKRB1, FYN, FAM83D, HOXA5, NANOS1, PRKCI, JUP, SHROOM2, TGFBR3, CEACAM1, PALLD, ELMO1, SDC1, ADAM9, CSPG4, GAS6, NOX1, EPHA2	1717	172	16792	1.53521	1	0.885065	0.881969
GOTERM_BP_DIRECT	GO:2000096~positive regulation of Wnt signaling pathway, planar cell polarity pathway	4	0.193611	0.0271976	DAB2, GPC3, RSPO3, ANKRD6	1717	7	16792	5.58848	1	0.885065	0.881969
GOTERM_BP_DIRECT	GO:0015677~copper ion import	4	0.193611	0.0271976	STEAP3, STEAP4, ATP7B, STEAP2	1717	7	16792	5.58848	1	0.885065	0.881969
GOTERM_BP_DIRECT	GO:0031581~hemidesmosome assembly	5	0.242014	0.0274989	COL17A1, LAMB3, KRT14, ITGA6, LAMC2	1717	12	16792	4.07494	1	0.885065	0.881969
GOTERM_BP_DIRECT	GO:0043116~negative regulation of vascular permeability	5	0.242014	0.0274989	CEACAM1, ANGPT1, PDE2A, PDE3A, SLIT2	1717	12	16792	4.07494	1	0.885065	0.881969
GOTERM_BP_DIRECT	GO:0007171~activation of transmembrane receptor protein tyrosine kinase activity	5	0.242014	0.0274989	CHRNA3, ANGPT1, NRG3, PDGFC, EFNA5	1717	12	16792	4.07494	1	0.885065	0.881969
GOTERM_BP_DIRECT	GO:0021510~spinal cord development	8	0.387222	0.0285774	ROBO2, SRD5A1, DPYSL2, NOG, NEFL, PTN, PKD2, PTBP2	1717	30	16792	2.60796	1	0.895002	0.891871
GOTERM_BP_DIRECT	GO:0007568~aging	26	1.25847	0.0291227	CDKN1C, RPN2, HMGCR, HTR2A, PPP1R9A, FGF2, EDNRB, KCNMB1, PENK, TSPO, APOD, DMD, SNCA, SLC12A2, JUN, MMP7, ENDOG, IGFBP5, GSS, FOS, DCN, AGT, KRT16, KRT14, GCLM, CRYAB	1717	165	16792	1.54107	1	0.895002	0.891871
GOTERM_BP_DIRECT	GO:0060221~retinal rod cell differentiation	3	0.145208	0.0291819	SOX8, PTN, SOX9	1717	3	16792	9.77985	1	0.895002	0.891871
GOTERM_BP_DIRECT	GO:0060672~epithelial cell morphogenesis involved in placental branching	3	0.145208	0.0291819	ST14, SPINT2, GRHL2	1717	3	16792	9.77985	1	0.895002	0.891871
GOTERM_BP_DIRECT	GO:2000035~regulation of stem cell division	3	0.145208	0.0291819	SFRP2, SOX17, NAP1L2	1717	3	16792	9.77985	1	0.895002	0.891871
GOTERM_BP_DIRECT	GO:0072137~condensed mesenchymal cell proliferation	3	0.145208	0.0291819	SIX2, DCHS1, FAT4	1717	3	16792	9.77985	1	0.895002	0.891871
GOTERM_BP_DIRECT	GO:0007015~actin filament organization	14	0.677638	0.0293655	TMOD1, FHOD3, PRKCI, CCL11, TPM1, TMOD2, LMOD1, RHOF, SORBS1, PPP1R9A, ARHGAP6, RND1, PDLIM3, DBN1	1717	72	16792	1.90164	1	0.895002	0.891871
GOTERM_BP_DIRECT	GO:0070371~ERK1 and ERK2 cascade	7	0.338819	0.0303008	CCL11, HTR2B, CTSH, SOX9, IGF1, AGT, FGF10	1717	24	16792	2.85246	1	0.895002	0.891871
GOTERM_BP_DIRECT	GO:0048041~focal adhesion assembly	7	0.338819	0.0303008	ACTN2, ITGA2, PTPRK, SORBS1, RHOD, ARHGAP6, FERMT2	1717	24	16792	2.85246	1	0.895002	0.891871
GOTERM_BP_DIRECT	GO:0014068~positive regulation of phosphatidylinositol 3-kinase signaling	13	0.629235	0.030362	MYOC, ANGPT1, IL18, PDGFA, IGF1, DCN, AGT, SELP, RELN, NEDD4, PDGFC, FYN, SOX9	1717	65	16792	1.95597	1	0.895002	0.891871
GOTERM_BP_DIRECT	GO:0051384~response to glucocorticoid	13	0.629235	0.030362	BCHE, IL1RN, GOT1, ANXA3, S100B, AREG, GHR, MDK, CASP3, SDC1, ADAM9, CDO1, PAM	1717	65	16792	1.95597	1	0.895002	0.891871
GOTERM_BP_DIRECT	GO:0071901~negative regulation of protein serine/threonine kinase activity	6	0.290416	0.03057	PYCARD, CDKN1C, PPP1R1B, HSPB1, CIB1, SFN	1717	18	16792	3.25995	1	0.895002	0.891871
GOTERM_BP_DIRECT	GO:0006970~response to osmotic stress	6	0.290416	0.03057	KCNMA1, MARVELD3, SLC2A1, SORD, MAP7, MAPK13	1717	18	16792	3.25995	1	0.895002	0.891871
GOTERM_BP_DIRECT	GO:0006939~smooth muscle contraction	6	0.290416	0.03057	CHRM3, SMTN, HTR2B, MYH11, HTR2A, MYLK	1717	18	16792	3.25995	1	0.895002	0.891871
GOTERM_BP_DIRECT	GO:0036342~post-anal tail morphogenesis	6	0.290416	0.03057	FZD3, VANGL2, SFRP2, SP5, DCHS1, EPHA2	1717	18	16792	3.25995	1	0.895002	0.891871
GOTERM_BP_DIRECT	GO:0042060~wound healing	15	0.726041	0.0311148	SPRR3, SDC4, CCL20, TPM1, NOG, PDGFA, FGF2, DCN, GLI3, DCBLD2, VANGL2, CASP3, ERBB2, SDC1, FGF10	1717	80	16792	1.83372	1	0.902354	0.899198
GOTERM_BP_DIRECT	GO:0042542~response to hydrogen peroxide	11	0.53243	0.0315638	JUN, NR4A3, TRPA1, MB, CASP3, HP, ADAM9, SDC1, KCNA5, CRYAB, AREG	1717	51	16792	2.10938	1	0.902354	0.899198
GOTERM_BP_DIRECT	GO:0007519~skeletal muscle tissue development	11	0.53243	0.0315638	SVIL, MEF2C, CFL2, CAV1, DMD, FLNB, NR2F2, MEOX2, BVES, DCN, FOXP2	1717	51	16792	2.10938	1	0.902354	0.899198
GOTERM_BP_DIRECT	GO:0071277~cellular response to calcium ion	11	0.53243	0.0315638	MEF2C, EDN1, CLIC4, JUN, ENDOG, SYT1, PPIF, FOSB, FOS, SLC25A23, RYR3	1717	51	16792	2.10938	1	0.902354	0.899198
GOTERM_BP_DIRECT	GO:0071456~cellular response to hypoxia	17	0.822846	0.0335893	EDN1, ENDOG, PTGIS, BNIP3, NDNF, PTN, S100B, NDRG1, VASN, AQP1, VEGFA, SFRP1, CPEB1, KCNMB1, MGARP, P4HB, KCNK3	1717	96	16792	1.73185	1	0.954644	0.951304
GOTERM_BP_DIRECT	GO:0043406~positive regulation of MAP kinase activity	12	0.580833	0.0348648	MEF2C, EDN1, MAGED1, LRRK2, ERBB2, PDGFC, HTR2B, PDGFA, ILK, HTR2A, FGF2, VEGFA	1717	59	16792	1.98912	1	0.970547	0.967152
GOTERM_BP_DIRECT	GO:0009612~response to mechanical stimulus	12	0.580833	0.0348648	POSTN, BTG2, JUN, CXCL12, ENDOG, FOSB, CHI3L1, BDKRB1, INHBB, KCNA5, MEIS2, DCN	1717	59	16792	1.98912	1	0.970547	0.967152
GOTERM_BP_DIRECT	GO:0007417~central nervous system development	20	0.968054	0.0354319	LYN, ROBO2, ARNT2, ZBTB16, PAX6, S100B, DCLK1, UGT8, PCP4, ALDH5A1, RELN, B3GNT5, PDGFC, DCX, NDN, NMUR2, FYN, NPTX1, PAM, TIMP4	1717	120	16792	1.62997	1	0.970547	0.967152
GOTERM_BP_DIRECT	GO:0006631~fatty acid metabolic process	11	0.53243	0.0356298	GHR, C3, FABP3, SGPL1, GPAM, PRKAR2B, EHHADH, MSMO1, BAAT, AACS, SNCA	1717	52	16792	2.06881	1	0.970547	0.967152
GOTERM_BP_DIRECT	GO:0001889~liver development	14	0.677638	0.0358833	CEBPA, JUN, ONECUT2, HMGCS1, CADM1, SRD5A1, CEBPG, LSR, PTN, BAAT, PKD2, AACS, TGFBR3, GNPNAT1	1717	74	16792	1.85024	1	0.970547	0.967152
GOTERM_BP_DIRECT	GO:0030514~negative regulation of BMP signaling pathway	10	0.484027	0.0359023	TWSG1, SFRP1, SFRP2, BMPER, CAV1, NOG, RBPMS2, NBL1, CHRDL1, SPG20	1717	45	16792	2.1733	1	0.970547	0.967152
GOTERM_BP_DIRECT	GO:0002227~innate immune response in mucosa	7	0.338819	0.0365301	NOS2, HIST1H2BK, HIST1H2BE, DEFB1, H2BFS, HIST1H2BD, HIST1H2BC	1717	25	16792	2.73836	1	0.970547	0.967152
GOTERM_BP_DIRECT	GO:0048709~oligodendrocyte differentiation	7	0.338819	0.0365301	TRPC4, ERBB2, TSPAN2, SOX8, SOX9, GLI3, BOK	1717	25	16792	2.73836	1	0.970547	0.967152
GOTERM_BP_DIRECT	GO:0030837~negative regulation of actin filament polymerization	5	0.242014	0.0365812	FHOD3, PRKCD, MYADM, SLIT2, PFN2	1717	13	16792	3.76148	1	0.970547	0.967152
GOTERM_BP_DIRECT	GO:0051145~smooth muscle cell differentiation	5	0.242014	0.0365812	MEF2C, MYOCD, FOXF1, HEY2, FGF10	1717	13	16792	3.76148	1	0.970547	0.967152
GOTERM_BP_DIRECT	GO:0002087~regulation of respiratory gaseous exchange by neurological system process	5	0.242014	0.0365812	NLGN1, TSHZ3, PBX3, ATP1A2, PHOX2B	1717	13	16792	3.76148	1	0.970547	0.967152
GOTERM_BP_DIRECT	GO:0033630~positive regulation of cell adhesion mediated by integrin	5	0.242014	0.0365812	IFT74, SFRP2, CCL21, ADAM9, CIB1	1717	13	16792	3.76148	1	0.970547	0.967152
GOTERM_BP_DIRECT	GO:0006006~glucose metabolic process	13	0.629235	0.0374722	G6PD, IGFBP5, DCXR, NPY1R, SORD, IRS2, ALDH5A1, OAS1, GNPDA2, PDK4, PGM5, APOD, GALM	1717	67	16792	1.89758	1	0.970547	0.967152
GOTERM_BP_DIRECT	GO:0008637~apoptotic mitochondrial changes	6	0.290416	0.0380973	AIFM2, BIK, PPIF, GCLM, SLC25A4, HK2	1717	19	16792	3.08837	1	0.970547	0.967152
GOTERM_BP_DIRECT	GO:0007263~nitric oxide mediated signal transduction	6	0.290416	0.0380973	GUCY1A3, GUCY1B3, RASD1, NOS2, NDNF, AGT	1717	19	16792	3.08837	1	0.970547	0.967152
GOTERM_BP_DIRECT	GO:0021772~olfactory bulb development	6	0.290416	0.0380973	CSF1R, TTC8, DPYSL2, SEMA3A, ID2, LRRK2	1717	19	16792	3.08837	1	0.970547	0.967152
GOTERM_BP_DIRECT	GO:0031290~retinal ganglion cell axon guidance	6	0.290416	0.0380973	ROBO2, EPHA7, SLIT2, BMPR1B, EFNA5, ISL1	1717	19	16792	3.08837	1	0.970547	0.967152
GOTERM_BP_DIRECT	GO:0008045~motor neuron axon guidance	6	0.290416	0.0380973	EPHA4, EGR2, ERBB2, NOG, HOXA2, SLIT2	1717	19	16792	3.08837	1	0.970547	0.967152
GOTERM_BP_DIRECT	GO:0018108~peptidyl-tyrosine phosphorylation	24	1.16167	0.0381245	LYN, EPHA4, CSF1R, EPHA7, PRKCD, FGF2, CLK1, BTC, SGK223, FGF7, RELN, EFEMP1, FGF9, ERBB2, TRIM24, FGF20, FYN, ROR2, MET, FGFR3, MAP2K6, FGF10, EPHA2, DDR2	1717	153	16792	1.53409	1	0.970547	0.967152
GOTERM_BP_DIRECT	GO:0010951~negative regulation of endopeptidase activity	20	0.968054	0.0381597	COL28A1, ITIH5, CSTB, SERPINA3, SERPINB1, SERPINA1, AMBP, PROS1, PAPLN, CRIM1, SPINT2, SERPINA6, SERPINB7, TFPI, SERPINB5, AGT, C3, SLPI, PI3, TIMP4	1717	121	16792	1.6165	1	0.970547	0.967152
GOTERM_BP_DIRECT	GO:0001501~skeletal system development	22	1.06486	0.0383728	CDKN1C, KLF10, POSTN, VDR, ZBTB16, NPR3, NOG, IHH, PRELP, IGF1, PAPSS2, PTHLH, HOXA11, RASSF2, FRZB, TRPS1, SOX9, BMPR1B, FGFR3, ARSE, NKX3-2, EPHA2	1717	137	16792	1.57049	1	0.970547	0.967152
GOTERM_BP_DIRECT	GO:0045669~positive regulation of osteoblast differentiation	12	0.580833	0.0388984	NPPC, CEBPA, MEF2C, SFRP2, CEBPD, ILK, PRKD1, IGF1, BMPR1B, FGF2, GLI3, DDR2	1717	60	16792	1.95597	1	0.970547	0.967152
GOTERM_BP_DIRECT	GO:0009953~dorsal/ventral pattern formation	8	0.387222	0.0395348	EDN1, IFT172, NOG, HOXA2, HOXB2, BMPR1B, GLI3, HOXA11	1717	32	16792	2.44496	1	0.970547	0.967152
GOTERM_BP_DIRECT	GO:0016264~gap junction assembly	4	0.193611	0.0402611	GJC1, GJB2, GJB1, PKP2	1717	8	16792	4.88992	1	0.970547	0.967152
GOTERM_BP_DIRECT	GO:0019934~cGMP-mediated signaling	4	0.193611	0.0402611	EDNRB, PDE2A, PDE3A, PRKG1	1717	8	16792	4.88992	1	0.970547	0.967152
GOTERM_BP_DIRECT	GO:0001504~neurotransmitter uptake	4	0.193611	0.0402611	SNAP25, SLC38A1, SV2A, ATP1A2	1717	8	16792	4.88992	1	0.970547	0.967152
GOTERM_BP_DIRECT	GO:0050773~regulation of dendrite development	4	0.193611	0.0402611	BCL11A, RTN4IP1, RAB17, DBN1	1717	8	16792	4.88992	1	0.970547	0.967152
GOTERM_BP_DIRECT	GO:0030836~positive regulation of actin filament depolymerization	4	0.193611	0.0402611	VIL1, SEMA5A, CFL2, DSTN	1717	8	16792	4.88992	1	0.970547	0.967152
GOTERM_BP_DIRECT	GO:0006487~protein N-linked glycosylation	9	0.435624	0.0407097	DPAGT1, FUT8, RPN2, TUSC3, PMM2, PGM3, MAN1C1, FUT4, FUT3	1717	39	16792	2.25689	1	0.970547	0.967152
GOTERM_BP_DIRECT	GO:0032570~response to progesterone	9	0.435624	0.0407097	GJB2, CLDN4, CATSPERB, CAV1, TSPO, FOSB, NR1H3, FOS, PTN	1717	39	16792	2.25689	1	0.970547	0.967152
GOTERM_BP_DIRECT	GO:0045668~negative regulation of osteoblast differentiation	9	0.435624	0.0407097	TWSG1, SFRP1, IGFBP5, ID2, HAND2, NOG, TWIST2, HOXA2, AREG	1717	39	16792	2.25689	1	0.970547	0.967152
GOTERM_BP_DIRECT	GO:0051591~response to cAMP	10	0.484027	0.040739	JUN, PDE3A, FOSB, SDC1, CNGA3, FOS, PLA2G5, CDO1, AREG, DUOX2	1717	46	16792	2.12605	1	0.970547	0.967152
GOTERM_BP_DIRECT	GO:0042552~myelination	10	0.484027	0.040739	CLDN5, CMTM8, EGR2, AMIGO1, ERBB2, LPAR1, TSPAN2, SERINC5, TNFRSF21, JAM3	1717	46	16792	2.12605	1	0.970547	0.967152
GOTERM_BP_DIRECT	GO:0090090~negative regulation of canonical Wnt signaling pathway	25	1.21007	0.0428736	JADE1, PRICKLE1, GLI3, SOX17, FRZB, GPC3, DACT3, SOX9, IGFBP6, ANKRD6, WWTR1, EGR1, TLE2, CAV1, NOG, PPP2R3A, MCC, ISL1, PSMB8, DKK4, DAB2, SFRP1, KIAA0922, SFRP2, ROR2	1717	163	16792	1.49998	1	1	0.996707
GOTERM_BP_DIRECT	GO:0030216~keratinocyte differentiation	14	0.677638	0.0433726	SPRR3, CLIC4, ST14, INTU, PAX6, PRR9, KRT16, CASP3, ADAM9, IRF6, SPRR1A, SPRR2B, SPRR1B, EPHA2	1717	76	16792	1.80155	1	1	0.996707
GOTERM_BP_DIRECT	GO:0002053~positive regulation of mesenchymal cell proliferation	7	0.338819	0.0435227	FGF9, FOXF1, PDGFA, IRS2, SOX9, FOXP2, VEGFA	1717	26	16792	2.63304	1	1	0.996707
GOTERM_BP_DIRECT	GO:0048843~negative regulation of axon extension involved in axon guidance	7	0.338819	0.0435227	SEMA5A, SEMA6A, SEMA3C, SEMA3A, SEMA4B, SEMA3G, SEMA3E	1717	26	16792	2.63304	1	1	0.996707
GOTERM_BP_DIRECT	GO:0043154~negative regulation of cysteine-type endopeptidase activity involved in apoptotic process	13	0.629235	0.0456814	TNFAIP8, DHCR24, AQP1, VEGFA, VIL1, POR, SFRP2, LAMP3, RPS6KA1, SFN, GAS6, CRYAB, SNCA	1717	69	16792	1.84258	1	1	0.996707
GOTERM_BP_DIRECT	GO:0009887~organ morphogenesis	16	0.774443	0.0458634	TLE2, SEMA6A, THRB, ONECUT2, ITGA2, FHL1, GMNN, PDGFA, PAX6, FGF2, DCN, ETV7, IL7, TRPS1, PDGFC, LY6H	1717	92	16792	1.70084	1	1	0.996707
GOTERM_BP_DIRECT	GO:0002027~regulation of heart rate	8	0.387222	0.0459157	POPDC2, RYR2, SEMA3A, CASQ2, DMD, ANK2, BVES, AGT	1717	33	16792	2.37087	1	1	0.996707
GOTERM_BP_DIRECT	GO:0010634~positive regulation of epithelial cell migration	8	0.387222	0.0459157	VIL1, JUN, ITGA3, ITGA2, CTSH, SOX9, TAC1, FGF10	1717	33	16792	2.37087	1	1	0.996707
GOTERM_BP_DIRECT	GO:0045600~positive regulation of fat cell differentiation	10	0.484027	0.0459971	CEBPA, ZFP36, SFRP1, SFRP2, FRZB, WIF1, ID2, ZBTB16, LMO3, HTR2A	1717	47	16792	2.08082	1	1	0.996707
GOTERM_BP_DIRECT	GO:0006491~N-glycan processing	6	0.290416	0.0466592	FUT8, MGAT4A, MGAT4B, EDEM2, MAN1C1, MAN1A1	1717	20	16792	2.93395	1	1	0.996707
GOTERM_BP_DIRECT	GO:0019229~regulation of vasoconstriction	6	0.290416	0.0466592	EDN1, AGTR1, KCNMB4, ATP1A2, KCNA5, AGT	1717	20	16792	2.93395	1	1	0.996707
GOTERM_BP_DIRECT	GO:0010001~glial cell differentiation	5	0.242014	0.0471836	GAP43, RELN, NFIB, FGF2, PHOX2B	1717	14	16792	3.4928	1	1	0.996707
GOTERM_BP_DIRECT	GO:0006937~regulation of muscle contraction	5	0.242014	0.0471836	HSPB6, KCNA1, TPM1, PPP1R12B, MYL9	1717	14	16792	3.4928	1	1	0.996707
GOTERM_BP_DIRECT	GO:0042311~vasodilation	5	0.242014	0.0471836	EDNRB, GCH1, KCNJ8, ITGA1, AGT	1717	14	16792	3.4928	1	1	0.996707
GOTERM_BP_DIRECT	GO:0035589~G-protein coupled purinergic nucleotide receptor signaling pathway	5	0.242014	0.0471836	P2RY12, GPR34, P2RY2, GPR87, P2RY14	1717	14	16792	3.4928	1	1	0.996707
GOTERM_BP_DIRECT	GO:0048009~insulin-like growth factor receptor signaling pathway	5	0.242014	0.0471836	GHR, IRS1, CRIM1, IGF1, PIK3R1	1717	14	16792	3.4928	1	1	0.996707
GOTERM_BP_DIRECT	GO:0005513~detection of calcium ion	5	0.242014	0.0471836	RYR2, SYT1, KCNMB1, CASQ2, KCNMB4	1717	14	16792	3.4928	1	1	0.996707
GOTERM_BP_DIRECT	GO:0010839~negative regulation of keratinocyte proliferation	5	0.242014	0.0471836	INTU, VDR, CASK, SFN, PTPRK	1717	14	16792	3.4928	1	1	0.996707
GOTERM_BP_DIRECT	GO:0032869~cellular response to insulin stimulus	14	0.677638	0.0474999	ERRFI1, PRKCI, GOT1, IRS1, SRD5A1, INHBB, IRS2, PIK3R1, SORBS1, HDAC9, GHR, CEACAM1, CPEB1, TBC1D4	1717	77	16792	1.77815	1	1	0.996707
