# Supplementary material for: Identification of the hub genes in gastric cancer through weighted gene co-expression network analysis
Source: PeerJ. 2021 Mar 5;9:e10682. doi: 10.7717/peerj.10682 (PMC7938783; doi:10.7717/peerj.10682)
Supplement: Table S4 [file peerj-09-10682-s005.xls]

## Sheet: greenyellow GO BP 删掉p大于0.05
Category	Term	Count	%	PValue	Genes	List Total	Pop Hits	Pop Total	Fold Enrichment	Bonferroni	Benjamini	FDR
GOTERM_BP_DIRECT	GO:0006954~inflammatory response	34	18.0851	2.8e-21	CEBPB, CXCL8, TNFAIP6, C5AR1, FPR1, TNFAIP3, FPR3, FPR2, PTGS2, CCL8, CLEC7A, CCL4, CXCR2, BDKRB2, PROK2, S100A12, OLR1, CCL18, CCR3, CCR1, SPHK1, PPBP, TNFRSF1B, IL1A, HCK, IL6, BCL6, IL2RA, NOX4, S100A9, TLR4, S100A8, CCL26, TLR2	176	379	16792	8.55913	3.94e-18	3.94e-18	3.78e-18
GOTERM_BP_DIRECT	GO:0006955~immune response	31	16.4894	5.7e-17	IFITM3, CD86, CEBPB, IGSF6, IFITM2, CXCL8, GPR65, C5AR1, AQP9, CCL8, FCGR3B, NFIL3, CCL4, CCL18, FCGR1B, CTSC, CCR1, OSM, SERPINB9, PPBP, LILRB2, TNFRSF1B, IL1A, IL6, IL2RA, TNFSF4, LCP2, FCGR2C, TLR4, CCL26, TLR2	176	421	16792	7.02537	1.56e-13	4.01e-14	3.85e-14
GOTERM_BP_DIRECT	GO:0030593~neutrophil chemotaxis	15	7.97872	5.15e-15	CSF3R, CXCL8, FCER1G, C5AR1, PPBP, TREM1, CCL8, CCL4, CXCR2, PDE4B, S100A12, CCL18, S100A9, S100A8, CCL26	176	66	16792	21.6839	7.19e-12	2.42e-12	2.32e-12
GOTERM_BP_DIRECT	GO:0006935~chemotaxis	16	8.51064	2.37e-12	CCR1, CXCL8, C5AR1, PLAUR, FPR1, FPR2, RNASE2, TYMP, CCL8, PLAU, CXCR2, PROK2, CMTM2, CCL18, CCR3, CCL26	176	122	16792	12.5127	3.34e-09	8.35e-10	8.02e-10
GOTERM_BP_DIRECT	GO:0030574~collagen catabolic process	12	6.38298	5.29e-11	COL1A1, ADAMTS2, MMP13, COL4A1, CTSL, COL11A1, COL12A1, COL5A2, COL10A1, MMP8, MMP9, CTSB	176	64	16792	17.8892	7.45e-08	1.49e-08	1.43e-08
GOTERM_BP_DIRECT	GO:0050729~positive regulation of inflammatory response	12	6.38298	2.34e-10	CCL8, TNFSF4, CCL4, S100A12, CCL18, PLA2G7, S100A9, TLR4, S100A8, CCL26, TLR2, TGM2	176	73	16792	15.6837	3.29e-07	5.48e-08	5.26e-08
GOTERM_BP_DIRECT	GO:0050900~leukocyte migration	14	7.44681	4.48e-10	FCER1G, C5AR1, FPR1, FPR3, FPR2, TREM1, MMP9, ICAM1, COL1A1, SELL, PODXL, PDE4B, OLR1, CD44	176	122	16792	10.9486	6.31e-07	9.01e-08	8.65e-08
GOTERM_BP_DIRECT	GO:0007155~cell adhesion	22	11.7021	1.38e-08	CCR1, CSF3R, TNFAIP6, TPBG, COL12A1, LAMB1, FPR2, WISP1, ICAM1, CLEC4A, COL1A1, COMP, HCK, SELL, FAP, PODXL, ADAM12, CCL4, OLR1, CDH13, CD44, CCR3	176	459	16792	4.57298	1.94e-05	2.43e-06	2.33e-06
GOTERM_BP_DIRECT	GO:0070374~positive regulation of ERK1 and ERK2 cascade	14	7.44681	3.71e-08	CCR1, C5AR1, TREM2, NOD2, ICAM1, IL6, CCL8, CCL4, KDR, NOX4, CCL18, TLR4, CD44, CCL26	176	175	16792	7.63273	5.23e-05	5.81e-06	5.58e-06
GOTERM_BP_DIRECT	GO:0071222~cellular response to lipopolysaccharide	11	5.85106	2.88e-07	CD86, IL6, CEBPB, CXCL8, TNFSF4, PDE4B, TNFAIP3, LILRB2, TNFRSF1B, TLR4, ICAM1	176	113	16792	9.28761	0.000405	4.05e-05	3.89e-05
GOTERM_BP_DIRECT	GO:0032755~positive regulation of interleukin-6 production	8	4.25532	3.85e-07	IL1A, IL6, FCER1G, TNFSF4, LILRB2, NOD2, TLR4, TLR2	176	45	16792	16.9616	0.000542	4.93e-05	4.73e-05
GOTERM_BP_DIRECT	GO:0070098~chemokine-mediated signaling pathway	9	4.78723	7.21e-07	CCR1, CCL8, CXCL8, CXCR2, CCL4, PPBP, CCL18, CCR3, CCL26	176	71	16792	12.0941	0.00101484	7.81e-05	7.5e-05
GOTERM_BP_DIRECT	GO:0071347~cellular response to interleukin-1	9	4.78723	7.21e-07	IL6, CEBPB, CCL8, CXCL8, CCL4, ADAMTS12, CCL18, ICAM1, CCL26	176	71	16792	12.0941	0.00101484	7.81e-05	7.5e-05
GOTERM_BP_DIRECT	GO:0007204~positive regulation of cytosolic calcium ion concentration	11	5.85106	1.4e-06	CCR1, TRPC6, C5AR1, CXCR2, BDKRB2, FPR1, PROK2, ADM, FPR3, FPR2, CCR3	176	134	16792	7.83209	0.00196816	0.000141	0.000135
GOTERM_BP_DIRECT	GO:0030199~collagen fibril organization	7	3.7234	2.88e-06	COL1A1, ADAMTS2, LOX, COL11A1, COL12A1, COL5A2, SERPINH1	176	39	16792	17.1247	0.00405247	0.000271	0.00026
GOTERM_BP_DIRECT	GO:0007165~signal transduction	31	16.4894	3.3e-06	CD83, CSF3R, CXCL8, TNFAIP6, C5AR1, FPR1, ADM, FPR3, WISP1, CCL8, PLAU, PDPN, CCL4, NAMPT, CLEC5A, CXCR2, PDE4B, CCL18, SH2B3, SPHK1, PLAUR, PILRA, LILRB2, TYROBP, TNFSF4, CD69, S100A9, FCGR2C, PTGES, CCL26, TLR2	176	1161	16792	2.54753	0.00464202	0.000278	0.000267
GOTERM_BP_DIRECT	GO:0032733~positive regulation of interleukin-10 production	6	3.19149	3.36e-06	CD83, FCER1G, TNFSF4, NOD2, TLR4, TLR2	176	23	16792	24.8893	0.00471318	0.000278	0.000267
GOTERM_BP_DIRECT	GO:0006968~cellular defense response	8	4.25532	3.59e-06	TYROBP, NCF2, CLEC5A, C5AR1, CXCR2, MNDA, LILRB2, CCR3	176	62	16792	12.3109	0.00504686	0.000281	0.00027
GOTERM_BP_DIRECT	GO:0030198~extracellular matrix organization	12	6.38298	6.71e-06	COL1A1, COMP, LOX, COL4A1, COL11A1, COL5A2, MFAP2, KDR, COL10A1, LAMB1, CD44, ICAM1	176	196	16792	5.84137	0.00940737	0.000497	0.000478
GOTERM_BP_DIRECT	GO:0051770~positive regulation of nitric-oxide synthase biosynthetic process	5	2.65957	7.57e-06	NAMPT, KDR, NOD2, TLR4, TLR2	176	13	16792	36.6958	0.0106062	0.000522	0.000501
GOTERM_BP_DIRECT	GO:0035987~endodermal cell differentiation	6	3.19149	7.78e-06	COL11A1, COL12A1, LAMB1, INHBA, MMP8, MMP9	176	27	16792	21.202	0.0108983	0.000522	0.000501
GOTERM_BP_DIRECT	GO:0032496~response to lipopolysaccharide	11	5.85106	8.6e-06	DUSP10, C5AR1, ACP5, ADM, PPBP, SOD2, PTGS2, TLR4, S100A8, PTGES, TLR2	176	164	16792	6.39939	0.0120335	0.00055	0.000528
GOTERM_BP_DIRECT	GO:0045087~innate immune response	17	9.04255	1.14e-05	FCER1G, NCF2, TREM2, NOD2, TMEM173, TREM1, CLEC4A, FGR, TYROBP, CLEC7A, CLEC5A, S100A12, CLEC4E, S100A9, TLR4, S100A8, TLR2	176	430	16792	3.77199	0.0159476	0.000699	0.000671
GOTERM_BP_DIRECT	GO:0007267~cell-cell signaling	13	6.91489	1.46e-05	CD86, CCR1, TNFAIP6, ADM, INHBA, LILRB2, WISP1, CCL8, CCL4, NAMPT, CCL18, S100A9, CCL26	176	254	16792	4.88314	0.0204033	0.000859	0.000825
GOTERM_BP_DIRECT	GO:0071356~cellular response to tumor necrosis factor	9	4.78723	1.97e-05	COL1A1, IL6, CCL8, CXCL8, CCL4, ADAMTS12, CCL18, ICAM1, CCL26	176	110	16792	7.8062	0.0273236	0.00110814	0.00106407
GOTERM_BP_DIRECT	GO:0030335~positive regulation of cell migration	11	5.85106	2.35e-05	FGR, COL1A1, CCR1, TNFAIP6, PLAU, PODXL, SPHK1, KDR, CDH13, LAMB1, CCL26	176	184	16792	5.7038	0.0324988	0.0012707	0.00122016
GOTERM_BP_DIRECT	GO:0045766~positive regulation of angiogenesis	9	4.78723	2.72e-05	IL1A, CXCL8, SPHK1, C5AR1, CXCR2, KDR, HMOX1, ADM, CCR3	176	115	16792	7.4668	0.0375472	0.0014174	0.00136102
GOTERM_BP_DIRECT	GO:0050727~regulation of inflammatory response	7	3.7234	4.88e-05	HCK, BCL6, TNFSF4, TNFAIP3, NOD2, ADAMTS12, PTGS2	176	63	16792	10.601	0.0664618	0.00245613	0.00235845
GOTERM_BP_DIRECT	GO:0002548~monocyte chemotaxis	6	3.19149	7.23e-05	IL6, CCL8, CCL4, S100A12, CCL18, CCL26	176	42	16792	13.6299	0.096756	0.00350893	0.00336937
GOTERM_BP_DIRECT	GO:0051092~positive regulation of NF-kappaB transcription factor activity	9	4.78723	7.68e-05	IL6, SPHK1, S100A12, NOD2, S100A9, TLR4, S100A8, ICAM1, TLR2	176	133	16792	6.45625	0.102531	0.00360575	0.00346234
GOTERM_BP_DIRECT	GO:0043066~negative regulation of apoptotic process	16	8.51064	8.6e-05	BCL2A1, SPHK1, PLK2, PLAUR, SERPINB9, SOD2, MMP9, COMP, HCK, IL6, CLEC5A, KDR, PROK2, TIMP1, CD44, TGM2	176	455	16792	3.35504	0.114066	0.00390669	0.00375131
GOTERM_BP_DIRECT	GO:0002675~positive regulation of acute inflammatory response	4	2.12766	0.000127	IL6, ALOX5AP, OSM, OSMR	176	10	16792	38.1636	0.163188	0.00556701	0.00534559
GOTERM_BP_DIRECT	GO:0042742~defense response to bacterium	9	4.78723	0.00014	CEBPB, FCER1G, S100A12, PPBP, NOD2, CLEC4E, S100A9, TLR4, S100A8	176	145	16792	5.92194	0.17904	0.00597779	0.00574004
GOTERM_BP_DIRECT	GO:0010575~positive regulation of vascular endothelial growth factor production	5	2.65957	0.000166	IL1A, C5AR1, SULF1, PTGS2, SULF2	176	27	16792	17.6684	0.208275	0.00686828	0.00659511
GOTERM_BP_DIRECT	GO:0008285~negative regulation of cell proliferation	14	7.44681	0.000268	CXCL8, IGFBP3, OSM, ADM, INHBA, PTGS2, SOD2, IL1A, IL6, BCL6, NOX4, CDH13, PTGES, TLR2	176	396	16792	3.37305	0.31426	0.0107773	0.0103487
GOTERM_BP_DIRECT	GO:0002526~acute inflammatory response	4	2.12766	0.000295	IL6, TNFSF4, S100A8, PTGES	176	13	16792	29.3566	0.339635	0.0112917	0.0108426
GOTERM_BP_DIRECT	GO:0006915~apoptotic process	17	9.04255	0.000297	GPR65, IGFBP3, C5AR1, TNFAIP3, SERPINB9, SULF1, TMEM173, COMP, IL1A, DRAM1, IL2RA, GAS2, MAP3K8, S100A9, S100A8, CTSC, TLR2	176	567	16792	2.86059	0.341541	0.0112917	0.0108426
GOTERM_BP_DIRECT	GO:0002374~cytokine secretion involved in immune response	3	1.59574	0.000322	NOD2, TREM1, TLR2	176	3	16792	95.4091	0.364355	0.0119222	0.011448
GOTERM_BP_DIRECT	GO:0048661~positive regulation of smooth muscle cell proliferation	6	3.19149	0.000399	IL6, NAMPT, CDH13, HMOX1, PTGS2, TGM2	176	60	16792	9.54091	0.429814	0.0144021	0.0138292
GOTERM_BP_DIRECT	GO:0007200~phospholipase C-activating G-protein coupled receptor signaling pathway	6	3.19149	0.000621	C5AR1, CXCR2, FPR1, FPR3, FPR2, GPR84	176	66	16792	8.67355	0.582861	0.0218516	0.0209825
GOTERM_BP_DIRECT	GO:0032722~positive regulation of chemokine production	4	2.12766	0.000679	IL6, FFAR2, TLR4, TLR2	176	17	16792	22.4492	0.615955	0.0233334	0.0224054
GOTERM_BP_DIRECT	GO:0045429~positive regulation of nitric oxide biosynthetic process	5	2.65957	0.0010244	IL6, SOD2, PTGS2, TLR4, ICAM1	176	43	16792	11.0941	0.763805	0.0343419	0.032976
GOTERM_BP_DIRECT	GO:0022617~extracellular matrix disassembly	6	3.19149	0.00118041	MMP13, CTSL, TIMP1, MMP8, MMP9, CD44	176	76	16792	7.5323	0.810429	0.0386514	0.0371141
GOTERM_BP_DIRECT	GO:0042346~positive regulation of NF-kappaB import into nucleus	4	2.12766	0.00128885	SPHK1, PTGS2, TLR4, TLR2	176	21	16792	18.1732	0.837304	0.0412432	0.0396028
GOTERM_BP_DIRECT	GO:0042493~response to drug	11	5.85106	0.00134699	COL1A1, CD86, IL6, NNMT, LOX, ACSL1, SLC1A3, INHBA, SOD2, PTGS2, ICAM1	176	304	16792	3.4523	0.850108	0.0421459	0.0404696
GOTERM_BP_DIRECT	GO:0051603~proteolysis involved in cellular protein catabolic process	5	2.65957	0.00155123	FAP, CTSL, ADAMTS12, CTSC, CTSB	176	48	16792	9.93845	0.887615	0.0474811	0.0455926
GOTERM_BP_DIRECT	GO:0014070~response to organic cyclic compound	5	2.65957	0.00167554	CD83, ACSL1, NAMPT, PTGES, ICAM1	176	49	16792	9.73562	0.905687	0.0501948	0.0481985
GOTERM_BP_DIRECT	GO:0007568~aging	8	4.25532	0.00173012	CD86, IL6, TRPC6, BCL2A1, ADM, TIMP1, TNFRSF1B, CTSC	176	165	16792	4.6259	0.912674	0.0507501	0.0487316
GOTERM_BP_DIRECT	GO:0050830~defense response to Gram-positive bacterium	6	3.19149	0.00194421	FGR, IL6, C5AR1, ACP5, ADM, TLR2	176	85	16792	6.73476	0.935437	0.0558664	0.0536444
GOTERM_BP_DIRECT	GO:0006928~movement of cell or subcellular component	6	3.19149	0.0020471	CXCL8, CCL4, PLAUR, FPR3, FPR2, PTGS2	176	86	16792	6.65645	0.94416	0.0576464	0.0553536
GOTERM_BP_DIRECT	GO:0050715~positive regulation of cytokine secretion	4	2.12766	0.00216175	FGR, IL1A, CLEC5A, CLEC4E	176	25	16792	15.2655	0.9525	0.0596811	0.0573074
GOTERM_BP_DIRECT	GO:0019221~cytokine-mediated signaling pathway	7	3.7234	0.00251156	CCR1, IL1A, HCK, IL6, CSF3R, CSF2RA, TGM2	176	131	16792	5.0982	0.971008	0.0680053	0.0653005
GOTERM_BP_DIRECT	GO:0050776~regulation of immune response	8	4.25532	0.00264928	COL1A1, TYROBP, SELL, BCL6, TREM2, LILRB2, TREM1, ICAM1	176	178	16792	4.28805	0.97613	0.0703808	0.0675816
GOTERM_BP_DIRECT	GO:0045630~positive regulation of T-helper 2 cell differentiation	3	1.59574	0.00290163	CD86, IL6, TNFSF4	176	8	16792	35.7784	0.983285	0.0742817	0.0713274
GOTERM_BP_DIRECT	GO:0045576~mast cell activation	3	1.59574	0.00290163	FCER1G, S100A12, LCP2	176	8	16792	35.7784	0.983285	0.0742817	0.0713274
GOTERM_BP_DIRECT	GO:0007169~transmembrane receptor protein tyrosine kinase signaling pathway	6	3.19149	0.00330607	FGR, HCK, BDKRB2, KDR, LCP2, PILRA	176	96	16792	5.96307	0.990559	0.0820247	0.0787624
GOTERM_BP_DIRECT	GO:0051216~cartilage development	5	2.65957	0.0033206	COL10A1, TIMP1, SULF1, CD44, SULF2	176	59	16792	8.08552	0.990751	0.0820247	0.0787624
GOTERM_BP_DIRECT	GO:0008360~regulation of cell shape	7	3.7234	0.00349271	FGR, HCK, IL6, PDPN, GAS2, KDR, ICAM1	176	140	16792	4.77045	0.992747	0.0847886	0.0814163
GOTERM_BP_DIRECT	GO:0071223~cellular response to lipoteichoic acid	3	1.59574	0.00370517	TREM2, TLR4, TLR2	176	9	16792	31.803	0.994628	0.0869479	0.0834898
GOTERM_BP_DIRECT	GO:0002237~response to molecule of bacterial origin	3	1.59574	0.00370517	CXCL8, TNFAIP3, TLR2	176	9	16792	31.803	0.994628	0.0869479	0.0834898
GOTERM_BP_DIRECT	GO:0007229~integrin-mediated signaling pathway	6	3.19149	0.00377332	FGR, HCK, TYROBP, FCER1G, ADAM12, PLEK	176	99	16792	5.78237	0.995121	0.0870956	0.0836316
GOTERM_BP_DIRECT	GO:0043065~positive regulation of apoptotic process	10	5.31915	0.00429157	IL6, BCL2A1, BCL6, IGFBP3, HMOX1, NOX4, ADM, MNDA, PTGS2, TGM2	176	300	16792	3.1803	0.997655	0.0974602	0.0935839
GOTERM_BP_DIRECT	GO:0002430~complement receptor mediated signaling pathway	3	1.59574	0.00459983	FPR1, FPR3, FPR2	176	10	16792	28.6227	0.998484	0.102803	0.0987138
GOTERM_BP_DIRECT	GO:0060326~cell chemotaxis	5	2.65957	0.00470721	CCL8, C5AR1, FPR1, FPR3, FPR2	176	65	16792	7.33916	0.998697	0.103559	0.0994399
GOTERM_BP_DIRECT	GO:0002523~leukocyte migration involved in inflammatory response	3	1.59574	0.00558365	PPBP, S100A9, S100A8	176	11	16792	26.0207	0.999623	0.12095	0.11614
GOTERM_BP_DIRECT	GO:0009615~response to virus	6	3.19149	0.00589405	IFITM3, FGR, CCL8, IFITM2, TNFSF4, CCL4	176	110	16792	5.20413	0.999757	0.12574	0.120739
GOTERM_BP_DIRECT	GO:0050710~negative regulation of cytokine secretion	3	1.59574	0.0066547	SRGN, IL6, TNFSF4	176	12	16792	23.8523	0.999917	0.138016	0.132526
GOTERM_BP_DIRECT	GO:0034605~cellular response to heat	4	2.12766	0.00666553	IL1A, MYOF, HSPA6, HMOX1	176	37	16792	10.3145	0.999919	0.138016	0.132526
GOTERM_BP_DIRECT	GO:0043123~positive regulation of I-kappaB kinase/NF-kappaB signaling	7	3.7234	0.00685248	IL1A, PLK2, HMOX1, S100A12, S100A4, NOD2, TGM2	176	161	16792	4.14822	0.999938	0.13983	0.134269
GOTERM_BP_DIRECT	GO:0030168~platelet activation	6	3.19149	0.00709142	COL1A1, IL6, TRPC6, FCER1G, PDPN, LCP2	176	115	16792	4.97787	0.999956	0.142639	0.136966
GOTERM_BP_DIRECT	GO:0006693~prostaglandin metabolic process	3	1.59574	0.00781106	PDPN, PTGS2, PTGES	176	13	16792	22.0175	0.999984	0.150657	0.144665
GOTERM_BP_DIRECT	GO:0051926~negative regulation of calcium ion transport	3	1.59574	0.00781106	LILRB2, PTGS2, ICAM1	176	13	16792	22.0175	0.999984	0.150657	0.144665
GOTERM_BP_DIRECT	GO:0001878~response to yeast	3	1.59574	0.00781106	CD86, IL6, ADM	176	13	16792	22.0175	0.999984	0.150657	0.144665
GOTERM_BP_DIRECT	GO:0032743~positive regulation of interleukin-2 production	3	1.59574	0.00905088	CD83, TNFSF4, PDE4B	176	14	16792	20.4448	0.999997	0.167679	0.16101
GOTERM_BP_DIRECT	GO:0009607~response to biotic stimulus	3	1.59574	0.00905088	IFITM3, IFITM2, CCL18	176	14	16792	20.4448	0.999997	0.167679	0.16101
GOTERM_BP_DIRECT	GO:0042554~superoxide anion generation	3	1.59574	0.00905088	NCF2, NOX4, SOD2	176	14	16792	20.4448	0.999997	0.167679	0.16101
GOTERM_BP_DIRECT	GO:0050728~negative regulation of inflammatory response	5	2.65957	0.00933862	TNFAIP6, IL2RA, ACP5, TNFAIP3, TNFRSF1B	176	79	16792	6.03855	0.999998	0.170763	0.163972
GOTERM_BP_DIRECT	GO:0008284~positive regulation of cell proliferation	12	6.38298	0.00978559	CD86, HCK, IL6, TNFSF4, NAMPT, CXCR2, OSM, KDR, PROK2, ADM, TIMP1, OSMR	176	466	16792	2.45689	0.999999	0.176642	0.169617
GOTERM_BP_DIRECT	GO:0031623~receptor internalization	4	2.12766	0.0101163	CXCL8, FCER1G, CXCR2, ADM	176	43	16792	8.87526	0.999999	0.179115	0.171991
GOTERM_BP_DIRECT	GO:0043410~positive regulation of MAPK cascade	5	2.65957	0.010177	IL6, IGFBP3, OSM, KDR, TNFRSF1B	176	81	16792	5.88945	0.999999	0.179115	0.171991
GOTERM_BP_DIRECT	GO:0002063~chondrocyte development	3	1.59574	0.0103723	COL11A1, SULF1, SULF2	176	15	16792	19.0818	1	0.180299	0.173128
GOTERM_BP_DIRECT	GO:0050731~positive regulation of peptidyl-tyrosine phosphorylation	5	2.65957	0.0106138	IL6, OSM, TREM2, CD44, ICAM1	176	82	16792	5.81763	1	0.182247	0.174999
GOTERM_BP_DIRECT	GO:0008015~blood circulation	4	2.12766	0.0114575	MYOF, BDKRB2, OLR1, ADM	176	45	16792	8.48081	1	0.194363	0.186633
GOTERM_BP_DIRECT	GO:0014002~astrocyte development	3	1.59574	0.0117735	S100A9, TLR4, S100A8	176	16	16792	17.8892	1	0.197346	0.189497
GOTERM_BP_DIRECT	GO:0008630~intrinsic apoptotic signaling pathway in response to DNA damage	4	2.12766	0.0128963	BCL2A1, HMOX1, SOD2, TNFRSF1B	176	47	16792	8.11992	1	0.208712	0.200411
GOTERM_BP_DIRECT	GO:0032760~positive regulation of tumor necrosis factor production	4	2.12766	0.0128963	FCER1G, NOD2, TLR4, TLR2	176	47	16792	8.11992	1	0.208712	0.200411
GOTERM_BP_DIRECT	GO:0071230~cellular response to amino acid stimulus	4	2.12766	0.0128963	COL1A1, CEBPB, COL4A1, COL5A2	176	47	16792	8.11992	1	0.208712	0.200411
GOTERM_BP_DIRECT	GO:0001501~skeletal system development	6	3.19149	0.0143968	COL1A1, COMP, COL12A1, COL5A2, COL10A1, MMP9	176	137	16792	4.1785	1	0.230349	0.221188
GOTERM_BP_DIRECT	GO:0046597~negative regulation of viral entry into host cell	3	1.59574	0.0148082	IFITM3, FCN1, IFITM2	176	18	16792	15.9015	1	0.234268	0.224951
GOTERM_BP_DIRECT	GO:0034097~response to cytokine	4	2.12766	0.0169266	ACP5, TIMP1, OSMR, PTGES	176	52	16792	7.33916	1	0.264807	0.254275
GOTERM_BP_DIRECT	GO:0050850~positive regulation of calcium-mediated signaling	3	1.59574	0.0181409	CCL4, CDH13, TREM2	176	20	16792	14.3114	1	0.277634	0.266592
GOTERM_BP_DIRECT	GO:0006801~superoxide metabolic process	3	1.59574	0.0181409	NCF2, NOX4, SOD2	176	20	16792	14.3114	1	0.277634	0.266592
GOTERM_BP_DIRECT	GO:0045987~positive regulation of smooth muscle contraction	3	1.59574	0.0199148	SPHK1, PROK2, PTGS2	176	21	16792	13.6299	1	0.300982	0.289011
GOTERM_BP_DIRECT	GO:0014846~esophagus smooth muscle contraction	2	1.06383	0.0207353	SULF1, SULF2	176	2	16792	95.4091	1	0.300982	0.289011
GOTERM_BP_DIRECT	GO:0070488~neutrophil aggregation	2	1.06383	0.0207353	S100A9, S100A8	176	2	16792	95.4091	1	0.300982	0.289011
GOTERM_BP_DIRECT	GO:0032764~negative regulation of mast cell cytokine production	2	1.06383	0.0207353	BCL6, HMOX1	176	2	16792	95.4091	1	0.300982	0.289011
GOTERM_BP_DIRECT	GO:0002752~cell surface pattern recognition receptor signaling pathway	2	1.06383	0.0207353	FCN1, FFAR2	176	2	16792	95.4091	1	0.300982	0.289011
GOTERM_BP_DIRECT	GO:0006959~humoral immune response	4	2.12766	0.0215837	IL6, CD83, TREM2, TREM1	176	57	16792	6.69537	1	0.306355	0.29417
GOTERM_BP_DIRECT	GO:0071346~cellular response to interferon-gamma	4	2.12766	0.0215837	CCL8, CCL4, CCL18, CCL26	176	57	16792	6.69537	1	0.306355	0.29417
GOTERM_BP_DIRECT	GO:0090023~positive regulation of neutrophil chemotaxis	3	1.59574	0.0217582	CXCL8, C5AR1, CXCR2	176	22	16792	13.0103	1	0.306355	0.29417
GOTERM_BP_DIRECT	GO:0071407~cellular response to organic cyclic compound	4	2.12766	0.0236231	MSR1, CEBPB, NOD2, TMEM173	176	59	16792	6.46841	1	0.329321	0.316223
GOTERM_BP_DIRECT	GO:0050679~positive regulation of epithelial cell proliferation	4	2.12766	0.0246807	IL6, C5AR1, LAMB1, NOD2	176	60	16792	6.36061	1	0.340691	0.32714
GOTERM_BP_DIRECT	GO:0007166~cell surface receptor signaling pathway	8	4.25532	0.0249371	CLEC4A, CCR1, IGSF6, IL2RA, CXCR2, BDKRB2, LILRB2, INHBA	176	274	16792	2.78567	1	0.340888	0.32733
GOTERM_BP_DIRECT	GO:0034341~response to interferon-gamma	3	1.59574	0.0256469	IFITM3, CD86, IFITM2	176	24	16792	11.9261	1	0.344311	0.330617
GOTERM_BP_DIRECT	GO:0000187~activation of MAPK activity	5	2.65957	0.0256766	C5AR1, FPR1, PROK2, NOD2, TLR4	176	107	16792	4.45837	1	0.344311	0.330617
GOTERM_BP_DIRECT	GO:0032735~positive regulation of interleukin-12 production	3	1.59574	0.0276891	TNFSF4, TLR4, TLR2	176	25	16792	11.4491	1	0.367795	0.353166
GOTERM_BP_DIRECT	GO:0009611~response to wounding	4	2.12766	0.0280046	CCR1, SLC1A3, ADM, SULF2	176	63	16792	6.05772	1	0.36851	0.353853
GOTERM_BP_DIRECT	GO:0001525~angiogenesis	7	3.7234	0.0295473	CXCL8, FAP, KDR, PROK2, HMOX1, PTGS2, TYMP	176	223	16792	2.9949	1	0.372362	0.357552
GOTERM_BP_DIRECT	GO:0001958~endochondral ossification	3	1.59574	0.0297944	COL1A1, MMP13, COL10A1	176	26	16792	11.0087	1	0.372362	0.357552
GOTERM_BP_DIRECT	GO:0032757~positive regulation of interleukin-8 production	3	1.59574	0.0297944	NOD2, TLR4, TLR2	176	26	16792	11.0087	1	0.372362	0.357552
GOTERM_BP_DIRECT	GO:0051928~positive regulation of calcium ion transport	3	1.59574	0.0297944	CCR1, TRPC6, CCL4	176	26	16792	11.0087	1	0.372362	0.357552
GOTERM_BP_DIRECT	GO:0050871~positive regulation of B cell activation	3	1.59574	0.0297944	IL6, TNFSF4, NOD2	176	26	16792	11.0087	1	0.372362	0.357552
GOTERM_BP_DIRECT	GO:0002292~T cell differentiation involved in immune response	2	1.06383	0.030942	FCER1G, CLEC4E	176	3	16792	63.6061	1	0.372362	0.357552
GOTERM_BP_DIRECT	GO:0030201~heparan sulfate proteoglycan metabolic process	2	1.06383	0.030942	SULF1, SULF2	176	3	16792	63.6061	1	0.372362	0.357552
GOTERM_BP_DIRECT	GO:0030104~water homeostasis	2	1.06383	0.030942	AQP9, NEDD4L	176	3	16792	63.6061	1	0.372362	0.357552
GOTERM_BP_DIRECT	GO:0032602~chemokine production	2	1.06383	0.030942	S100A9, S100A8	176	3	16792	63.6061	1	0.372362	0.357552
GOTERM_BP_DIRECT	GO:0010572~positive regulation of platelet activation	2	1.06383	0.030942	PLEK, TLR4	176	3	16792	63.6061	1	0.372362	0.357552
GOTERM_BP_DIRECT	GO:0050832~defense response to fungus	3	1.59574	0.0319614	S100A12, S100A9, S100A8	176	27	16792	10.601	1	0.375013	0.360098
GOTERM_BP_DIRECT	GO:0002224~toll-like receptor signaling pathway	3	1.59574	0.0319614	CTSL, TLR4, CTSB	176	27	16792	10.601	1	0.375013	0.360098
GOTERM_BP_DIRECT	GO:0042104~positive regulation of activated T cell proliferation	3	1.59574	0.0319614	CD86, IL2RA, TNFSF4	176	27	16792	10.601	1	0.375013	0.360098
GOTERM_BP_DIRECT	GO:0032868~response to insulin	4	2.12766	0.0327879	IL6, ACVR1C, ADM, TLR2	176	67	16792	5.69607	1	0.378405	0.363355
GOTERM_BP_DIRECT	GO:0006952~defense response	4	2.12766	0.0327879	CSF3R, CD83, INHBA, NOD2	176	67	16792	5.69607	1	0.378405	0.363355
GOTERM_BP_DIRECT	GO:0048247~lymphocyte chemotaxis	3	1.59574	0.0341884	CCL8, CCL18, CCL26	176	28	16792	10.2224	1	0.385163	0.369844
GOTERM_BP_DIRECT	GO:2000352~negative regulation of endothelial cell apoptotic process	3	1.59574	0.0341884	KDR, TNFAIP3, ICAM1	176	28	16792	10.2224	1	0.385163	0.369844
GOTERM_BP_DIRECT	GO:0001666~response to hypoxia	6	3.19149	0.0341942	PLAU, HMOX1, NOX4, ADM, SOD2, TLR2	176	172	16792	3.32822	1	0.385163	0.369844
GOTERM_BP_DIRECT	GO:0001938~positive regulation of endothelial cell proliferation	4	2.12766	0.035329	KDR, CDH13, CCR3, CCL26	176	69	16792	5.53096	1	0.394788	0.379086
GOTERM_BP_DIRECT	GO:0048662~negative regulation of smooth muscle cell proliferation	3	1.59574	0.0364742	IGFBP3, TNFAIP3, HMOX1	176	29	16792	9.86991	1	0.401216	0.385258
GOTERM_BP_DIRECT	GO:0097421~liver regeneration	3	1.59574	0.0364742	CEBPB, HMOX1, SULF2	176	29	16792	9.86991	1	0.401216	0.385258
GOTERM_BP_DIRECT	GO:0006508~proteolysis	11	5.85106	0.0369	FCN1, MMP13, FAP, PLAU, CTSL, ADAM12, OLR1, MMP8, MMP9, CTSC, CTSB	176	500	16792	2.099	1	0.402754	0.386735
GOTERM_BP_DIRECT	GO:0060333~interferon-gamma-mediated signaling pathway	4	2.12766	0.037969	HCK, FCGR1B, CD44, ICAM1	176	71	16792	5.37516	1	0.408094	0.391863
GOTERM_BP_DIRECT	GO:0071260~cellular response to mechanical stimulus	4	2.12766	0.037969	COL1A1, PTGS2, TLR4, KCNJ2	176	71	16792	5.37516	1	0.408094	0.391863
GOTERM_BP_DIRECT	GO:0044344~cellular response to fibroblast growth factor stimulus	3	1.59574	0.0388171	COL1A1, CXCL8, CD44	176	30	16792	9.54091	1	0.408675	0.392421
GOTERM_BP_DIRECT	GO:0048706~embryonic skeletal system development	3	1.59574	0.0388171	COL1A1, SULF1, SULF2	176	30	16792	9.54091	1	0.408675	0.392421
GOTERM_BP_DIRECT	GO:0002793~positive regulation of peptide secretion	2	1.06383	0.041043	S100A9, S100A8	176	4	16792	47.7045	1	0.408675	0.392421
GOTERM_BP_DIRECT	GO:1901164~negative regulation of trophoblast cell migration	2	1.06383	0.041043	ACVR1C, TIMP1	176	4	16792	47.7045	1	0.408675	0.392421
GOTERM_BP_DIRECT	GO:0032497~detection of lipopolysaccharide	2	1.06383	0.041043	TREM2, TLR4	176	4	16792	47.7045	1	0.408675	0.392421
GOTERM_BP_DIRECT	GO:0038165~oncostatin-M-mediated signaling pathway	2	1.06383	0.041043	OSM, OSMR	176	4	16792	47.7045	1	0.408675	0.392421
GOTERM_BP_DIRECT	GO:0038094~Fc-gamma receptor signaling pathway	2	1.06383	0.041043	FCER1G, CLEC4E	176	4	16792	47.7045	1	0.408675	0.392421
GOTERM_BP_DIRECT	GO:0032119~sequestering of zinc ion	2	1.06383	0.041043	S100A9, S100A8	176	4	16792	47.7045	1	0.408675	0.392421
GOTERM_BP_DIRECT	GO:0043372~positive regulation of CD4-positive, alpha-beta T cell differentiation	2	1.06383	0.041043	CD83, TNFSF4	176	4	16792	47.7045	1	0.408675	0.392421
GOTERM_BP_DIRECT	GO:0002283~neutrophil activation involved in immune response	2	1.06383	0.041043	TYROBP, FCER1G	176	4	16792	47.7045	1	0.408675	0.392421
GOTERM_BP_DIRECT	GO:0045765~regulation of angiogenesis	3	1.59574	0.0412158	IL6, PROK2, HMOX1	176	31	16792	9.23314	1	0.408675	0.392421
GOTERM_BP_DIRECT	GO:0007623~circadian rhythm	4	2.12766	0.0435422	NFIL3, NAMPT, PROK2, HS3ST2	176	75	16792	5.08848	1	0.426984	0.410002
GOTERM_BP_DIRECT	GO:0031663~lipopolysaccharide-mediated signaling pathway	3	1.59574	0.0436689	HCK, TLR4, TLR2	176	32	16792	8.9446	1	0.426984	0.410002
GOTERM_BP_DIRECT	GO:1902042~negative regulation of extrinsic apoptotic signaling pathway via death domain receptors	3	1.59574	0.0461749	TNFAIP3, HMOX1, ICAM1	176	33	16792	8.67355	1	0.448374	0.430541
GOTERM_BP_DIRECT	GO:0007186~G-protein coupled receptor signaling pathway	16	8.51064	0.0488235	FCN1, FZD2, CXCL8, GPR65, FPR1, PPBP, FPR2, HCAR3, CCL8, CCL4, BDKRB2, PROK2, FFAR2, CCL18, CCL26, TGM2	176	899	16792	1.69805	1	0.470846	0.452119
