# Supplementary material for: Identification of the hub genes in gastric cancer through weighted gene co-expression network analysis
Source: PeerJ. 2021 Mar 5;9:e10682. doi: 10.7717/peerj.10682 (PMC7938783; doi:10.7717/peerj.10682)
Supplement: Table S5 [file peerj-09-10682-s006.xls]

## Sheet: Salmon GO BP
Category	Term	Count	%	PValue	Genes	List Total	Pop Hits	Pop Total	Fold Enrichment	Bonferroni	Benjamini	FDR
GOTERM_BP_DIRECT	GO:0051607~defense response to virus	20	33.3333	3.33211e-25	IFITM1, CXCL9, RSAD2, STAT1, MX2, MX1, NLRC5, IFIT5, ISG15, IFIT1, IFIT3, IFI44L, IFIT2, BST2, HERC5, CXCL10, IFNG, OAS2, IRF1, GBP1	55	165	16792	37.0072	1.43281e-22	1.43281e-22	1.3595e-22
GOTERM_BP_DIRECT	GO:0060337~type I interferon signaling pathway	15	25	8.52353e-23	IFITM1, RSAD2, STAT1, MX2, MX1, IFI6, ISG15, IFI35, IFIT1, IFIT3, IFIT2, BST2, OAS2, IRF1, XAF1	55	64	16792	71.5568	3.66512e-20	1.83256e-20	1.7388e-20
GOTERM_BP_DIRECT	GO:0009615~response to virus	13	21.6667	9.02314e-16	IFITM1, RSAD2, DDX58, MX2, MX1, IFI44, IFIT1, IFIT3, IFIT2, IFIH1, BST2, IFNG, OAS2	55	110	16792	36.082	3.81917e-13	1.29332e-13	1.22715e-13
GOTERM_BP_DIRECT	GO:0032480~negative regulation of type I interferon production	6	10	3.81379e-08	IFIH1, HERC5, DDX58, NLRC5, ISG15, UBE2L6	55	30	16792	61.0618	1.63992e-05	4.09982e-06	3.89007e-06
GOTERM_BP_DIRECT	GO:0045071~negative regulation of viral genome replication	6	10	1.71864e-07	BST2, IFITM1, RSAD2, MX1, ISG15, IFIT1	55	40	16792	45.7964	7.38987e-05	1.47803e-05	1.40241e-05
GOTERM_BP_DIRECT	GO:0006955~immune response	11	18.3333	7.87489e-07	CD274, CXCL10, CXCL11, CXCL9, AIM2, IFNG, OAS2, TNFSF10, IFI6, SECTM1, CTSS	55	421	16792	7.9772	0.000338563	5.64367e-05	5.35493e-05
GOTERM_BP_DIRECT	GO:0035456~response to interferon-beta	4	6.66667	2.60484e-06	BST2, IFITM1, STAT1, XAF1	55	9	16792	135.693	0.00111945	0.000160011	0.000151825
GOTERM_BP_DIRECT	GO:0060333~interferon-gamma-mediated signaling pathway	6	10	3.15359e-06	IFNG, STAT1, OAS2, IRF1, JAK2, GBP1	55	71	16792	25.8008	0.00135513	0.000169505	0.000160833
GOTERM_BP_DIRECT	GO:0045087~innate immune response	10	16.6667	8.33685e-06	IFIH1, HERC5, BST2, AIM2, DDX58, MX2, MX1, NLRC5, IFIT5, JAK2	55	430	16792	7.10021	0.00357844	0.000398316	0.000377937
GOTERM_BP_DIRECT	GO:0006915~apoptotic process	10	16.6667	7.33302e-05	AIM2, IFNG, STAT1, IRF1, MX1, CASP1, TNFSF10, GZMB, XAF1, JAK2	55	567	16792	5.38464	0.0310412	0.0031532	0.00299187
GOTERM_BP_DIRECT	GO:0032020~ISG15-protein conjugation	3	5	0.000151005	HERC5, ISG15, UBE2L6	55	6	16792	152.655	0.0628737	0.00541103	0.00513418
GOTERM_BP_DIRECT	GO:0030816~positive regulation of cAMP metabolic process	3	5	0.000151005	CXCL10, CXCL11, CXCL9	55	6	16792	152.655	0.0628737	0.00541103	0.00513418
GOTERM_BP_DIRECT	GO:0032496~response to lipopolysaccharide	6	10	0.000179631	CXCL10, CXCL11, CXCL9, CASP1, JAK2, IDO1	55	164	16792	11.1698	0.07434	0.00594164	0.00563765
GOTERM_BP_DIRECT	GO:0035455~response to interferon-alpha	3	5	0.000449291	BST2, IFITM1, MX2	55	10	16792	91.5927	0.175715	0.0137996	0.0130936
GOTERM_BP_DIRECT	GO:0033209~tumor necrosis factor-mediated signaling pathway	5	8.33333	0.000558789	AIM2, STAT1, JAK2, PSMB10, PSMB9	55	118	16792	12.9368	0.213644	0.0160186	0.0151991
GOTERM_BP_DIRECT	GO:0043950~positive regulation of cAMP-mediated signaling	3	5	0.000656247	CXCL10, CXCL11, CXCL9	55	12	16792	76.3273	0.245936	0.0176366	0.0167343
GOTERM_BP_DIRECT	GO:0060334~regulation of interferon-gamma-mediated signaling pathway	3	5	0.000773966	IFNG, STAT1, JAK2	55	13	16792	70.4559	0.283183	0.0195768	0.0185752
GOTERM_BP_DIRECT	GO:0035458~cellular response to interferon-beta	3	5	0.00118338	AIM2, STAT1, IRF1	55	16	16792	57.2455	0.398996	0.0279949	0.0265626
GOTERM_BP_DIRECT	GO:0002250~adaptive immune response	5	8.33333	0.00130155	IFNG, ERAP2, TAP1, JAK2, CTSS	55	148	16792	10.3145	0.428809	0.0279949	0.0265626
GOTERM_BP_DIRECT	GO:0006952~defense response	4	6.66667	0.00130209	CXCL9, MX2, MX1, TAP1	55	67	16792	18.2274	0.428942	0.0279949	0.0265626
GOTERM_BP_DIRECT	GO:0002690~positive regulation of leukocyte chemotaxis	3	5	0.0015026	CXCL10, CXCL11, CXCL9	55	18	16792	50.8848	0.476178	0.0307675	0.0291934
GOTERM_BP_DIRECT	GO:0007166~cell surface receptor signaling pathway	6	10	0.00183636	CD274, CXCL10, IFITM1, LAG3, IFNG, TNFSF10	55	274	16792	6.6856	0.546318	0.0358924	0.0340561
GOTERM_BP_DIRECT	GO:0050718~positive regulation of interleukin-1 beta secretion	3	5	0.00225002	AIM2, IFNG, CASP1	55	22	16792	41.6331	0.620386	0.0420656	0.0399134
GOTERM_BP_DIRECT	GO:0051281~positive regulation of release of sequestered calcium ion into cytosol	3	5	0.00338388	CXCL10, CXCL11, CXCL9	55	27	16792	33.9232	0.767191	0.0582028	0.0552249
GOTERM_BP_DIRECT	GO:0032728~positive regulation of interferon-beta production	3	5	0.00338388	IFIH1, DDX58, IRF1	55	27	16792	33.9232	0.767191	0.0582028	0.0552249
GOTERM_BP_DIRECT	GO:0048285~organelle fission	2	3.33333	0.00642148	MX2, MX1	55	2	16792	305.309	0.937347	0.102268	0.0970358
GOTERM_BP_DIRECT	GO:0034344~regulation of type III interferon production	2	3.33333	0.00642148	IFIH1, DDX58	55	2	16792	305.309	0.937347	0.102268	0.0970358
GOTERM_BP_DIRECT	GO:0008285~negative regulation of cell proliferation	6	10	0.00872424	IFITM1, WARS, RARRES3, IRF1, JAK2, IFIT3	55	396	16792	4.6259	0.976899	0.132642	0.125856
GOTERM_BP_DIRECT	GO:0007267~cell-cell signaling	5	8.33333	0.00894566	BST2, CXCL10, CXCL11, CXCL9, TNFSF10	55	254	16792	6.01002	0.979015	0.132642	0.125856
GOTERM_BP_DIRECT	GO:0039528~cytoplasmic pattern recognition receptor signaling pathway in response to virus	2	3.33333	0.00961703	IFIH1, DDX58	55	3	16792	203.539	0.984319	0.137844	0.130792
GOTERM_BP_DIRECT	GO:0051603~proteolysis involved in cellular protein catabolic process	3	5	0.0104162	CTSS, PSMB10, PSMB9	55	48	16792	19.0818	0.988918	0.144483	0.137091
GOTERM_BP_DIRECT	GO:0007165~signal transduction	10	16.6667	0.0110879	CD274, CXCL10, CXCL11, CXCL9, KLRC3, MX1, CASP1, TNFSF10, SECTM1, JAK2	55	1161	16792	2.62971	0.991724	0.148993	0.14137
GOTERM_BP_DIRECT	GO:0046006~regulation of activated T cell proliferation	2	3.33333	0.0128025	CD274, IDO1	55	4	16792	152.655	0.996076	0.16682	0.158285
GOTERM_BP_DIRECT	GO:0006959~humoral immune response	3	5	0.0144692	BST2, IFNG, PSMB10	55	57	16792	16.0689	0.998102	0.180802	0.171552
GOTERM_BP_DIRECT	GO:0043123~positive regulation of I-kappaB kinase/NF-kappaB signaling	4	6.66667	0.0150135	BST2, CASP1, TNFSF10, SECTM1	55	161	16792	7.58532	0.998504	0.180802	0.171552
GOTERM_BP_DIRECT	GO:0019941~modification-dependent protein catabolic process	2	3.33333	0.0159779	ISG15, UBE2L6	55	5	16792	122.124	0.999018	0.180802	0.171552
GOTERM_BP_DIRECT	GO:0009597~detection of virus	2	3.33333	0.0159779	IFIH1, DDX58	55	5	16792	122.124	0.999018	0.180802	0.171552
GOTERM_BP_DIRECT	GO:0019060~intracellular transport of viral protein in host cell	2	3.33333	0.0159779	TAP1, IFIT1	55	5	16792	122.124	0.999018	0.180802	0.171552
GOTERM_BP_DIRECT	GO:0006968~cellular defense response	3	5	0.0169695	CXCL9, GNLY, KLRC3	55	62	16792	14.773	0.999363	0.1871	0.177527
GOTERM_BP_DIRECT	GO:0070269~pyroptosis	2	3.33333	0.0191433	AIM2, CASP1	55	6	16792	101.77	0.999754	0.200771	0.190499
GOTERM_BP_DIRECT	GO:0045084~positive regulation of interleukin-12 biosynthetic process	2	3.33333	0.0191433	IFNG, IRF1	55	6	16792	101.77	0.999754	0.200771	0.190499
GOTERM_BP_DIRECT	GO:0042127~regulation of cell proliferation	4	6.66667	0.0216404	CXCL10, CXCL11, CXCL9, JAK2	55	185	16792	6.60128	0.999918	0.210088	0.199339
GOTERM_BP_DIRECT	GO:0070098~chemokine-mediated signaling pathway	3	5	0.0218947	CXCL10, CXCL11, CXCL9	55	71	16792	12.9004	0.999927	0.210088	0.199339
GOTERM_BP_DIRECT	GO:0019885~antigen processing and presentation of endogenous peptide antigen via MHC class I	2	3.33333	0.0222987	ERAP2, TAP1	55	7	16792	87.2312	0.999939	0.210088	0.199339
GOTERM_BP_DIRECT	GO:0034340~response to type I interferon	2	3.33333	0.0222987	MX1, ISG15	55	7	16792	87.2312	0.999939	0.210088	0.199339
GOTERM_BP_DIRECT	GO:0016485~protein processing	3	5	0.0224745	CASP1, GZMB, CTSS	55	72	16792	12.7212	0.999943	0.210088	0.199339
GOTERM_BP_DIRECT	GO:0032731~positive regulation of interleukin-1 beta production	2	3.33333	0.0254441	AIM2, JAK2	55	8	16792	76.3273	0.999985	0.227936	0.216275
GOTERM_BP_DIRECT	GO:0010818~T cell chemotaxis	2	3.33333	0.0254441	CXCL10, CXCL11	55	8	16792	76.3273	0.999985	0.227936	0.216275
GOTERM_BP_DIRECT	GO:0035457~cellular response to interferon-alpha	2	3.33333	0.0285796	IFIT3, IFIT2	55	9	16792	67.8465	0.999996	0.2508	0.237969
GOTERM_BP_DIRECT	GO:0006919~activation of cysteine-type endopeptidase activity involved in apoptotic process	3	5	0.0292604	CASP1, TNFSF10, JAK2	55	83	16792	11.0353	0.999997	0.251639	0.238765
GOTERM_BP_DIRECT	GO:0050868~negative regulation of T cell activation	2	3.33333	0.0348209	LAG3, TIGIT	55	11	16792	55.5107	1	0.293588	0.278567
GOTERM_BP_DIRECT	GO:0032693~negative regulation of interleukin-10 production	2	3.33333	0.0379267	CD274, IDO1	55	12	16792	50.8848	1	0.307707	0.291964
GOTERM_BP_DIRECT	GO:0032727~positive regulation of interferon-alpha production	2	3.33333	0.0379267	IFIH1, DDX58	55	12	16792	50.8848	1	0.307707	0.291964
GOTERM_BP_DIRECT	GO:0097296~activation of cysteine-type endopeptidase activity involved in apoptotic signaling pathway	2	3.33333	0.0410228	TNFSF10, JAK2	55	13	16792	46.9706	1	0.326663	0.30995
