# Supplementary material for: Identification of the hub genes in gastric cancer through weighted gene co-expression network analysis
Source: PeerJ. 2021 Mar 5;9:e10682. doi: 10.7717/peerj.10682 (PMC7938783; doi:10.7717/peerj.10682)
Supplement: Table S6 [file peerj-09-10682-s007.xls]

## Sheet: blue KEGG 20200928
Category	Term	Count	%	PValue	Genes	List Total	Pop Hits	Pop Total	Fold Enrichment	Bonferroni	Benjamini	FDR
KEGG_PATHWAY	hsa04110:Cell cycle	41	2.79482	1.21e-15	MAD1L1, E2F3, E2F5, DBF4, TTK, CHEK1, CHEK2, PTTG1, CCNE2, CCNE1, CDC45, RAD21, MCM7, CDKN2A, ORC6, CCNA2, MYC, ORC1, TFDP1, CDC7, CDK1, CDC6, SKP2, ESPL1, CDK6, CDC20, MCM2, CDK7, MCM3, CDK4, MCM4, MCM5, WEE1, CDC25A, MCM6, CDC25B, CCNB1, MAD2L1, PCNA, BUB1B, MAD2L2	535	124	6879	4.25142	3.4e-13	3.4e-13	1.61e-12
KEGG_PATHWAY	hsa03030:DNA replication	22	1.49966	6.21e-15	LIG1, POLA1, MCM2, RNASEH2A, MCM3, MCM4, RPA4, MCM5, RPA3, MCM6, PRIM1, DNA2, RFC3, RFC4, MCM7, POLE2, RFC2, POLE3, POLD1, PRIM2, PCNA, FEN1	535	36	6879	7.85763	1.73e-12	8.64e-13	8.22e-12
KEGG_PATHWAY	hsa04115:p53 signaling pathway	19	1.29516	2.03e-06	BID, CDK1, RPRM, CHEK1, CDK6, CHEK2, PMAIP1, CCNG1, CDK4, SESN1, GTSE1, CCNB1, CCNE2, CCNE1, CDKN2A, RRM2, BAX, SERPINE1, DDB2	535	67	6879	3.64628	0.000563	0.000188	0.00267655
KEGG_PATHWAY	hsa03430:Mismatch repair	11	0.74983	3.31e-06	EXO1, RFC3, RFC4, RFC2, MSH2, LIG1, POLD1, PCNA, MLH1, RPA4, RPA3	535	23	6879	6.14945	0.00092	0.00023	0.004375
KEGG_PATHWAY	hsa00240:Pyrimidine metabolism	21	1.43149	7.66e-05	POLR2H, NUDT2, PNPT1, POLA1, UPP1, CTPS1, POLR1C, POLR2D, TK1, PRIM1, TYMS, POLE2, NME1, POLE3, RRM2, POLD1, RRM1, PRIM2, CDA, ENTPD3, DCTPP1	535	101	6879	2.67343	0.0210711	0.00425019	0.101127
KEGG_PATHWAY	hsa03410:Base excision repair	10	0.681663	0.00068	POLE2, POLE3, LIG1, UNG, POLD1, NEIL3, NEIL2, PCNA, PARP1, FEN1	535	33	6879	3.89635	0.172305	0.0310269	0.894438
KEGG_PATHWAY	hsa03420:Nucleotide excision repair	12	0.817996	0.000737	RFC3, RFC4, POLE2, POLE3, RFC2, LIG1, POLD1, PCNA, DDB2, CDK7, RPA4, RPA3	535	47	6879	3.28288	0.185415	0.0288716	0.969583
KEGG_PATHWAY	hsa03440:Homologous recombination	8	0.545331	0.00564994	BLM, POLD1, BRCA2, RAD54B, RAD54L, RPA4, RAD51, RPA3	535	29	6879	3.54702	0.793021	0.178721	7.2103
KEGG_PATHWAY	hsa03008:Ribosome biogenesis in eukaryotes	15	1.02249	0.00668816	NXT1, EIF6, GTPBP4, EMG1, FBL, POP1, NOP58, NAT10, POP4, RBM28, WDR43, RPP40, POP7, XRN2, GNL3	535	87	6879	2.21689	0.84519	0.187211	8.48179
KEGG_PATHWAY	hsa03460:Fanconi anemia pathway	11	0.74983	0.00678225	BLM, FANCI, BRCA2, MLH1, BRIP1, RMI2, FANCG, RPA4, UBE2T, RAD51, RPA3	535	53	6879	2.66863	0.849213	0.17237	8.59622
KEGG_PATHWAY	hsa00480:Glutathione metabolism	10	0.681663	0.0153817	GSTM2, ODC1, GSTA4, GGCT, RRM2, GPX3, RRM1, GSTT1, SMS, GSTP1	535	51	6879	2.52117	0.986558	0.324133	18.5138
KEGG_PATHWAY	hsa00670:One carbon pool by folate	6	0.408998	0.0161192	MTHFD2, TYMS, SHMT2, DHFR, ATIC, AMT	535	20	6879	3.85738	0.989085	0.313721	19.3162
KEGG_PATHWAY	hsa00230:Purine metabolism	23	1.56783	0.0171496	POLR2H, NUDT2, PNPT1, ENPP4, POLA1, POLR1C, POLR2D, PPAT, PFAS, PRIM1, POLE2, NME1, ATIC, POLE3, RRM2, ADK, POLD1, RRM1, PRIM2, ENTPD3, PAICS, IMPDH2, PRPS1	535	176	6879	1.6803	0.991844	0.30921	20.4252
KEGG_PATHWAY	hsa04978:Mineral absorption	9	0.613497	0.0183725	MT1M, MT2A, CYBRD1, MT1E, MT1H, STEAP1, MT1X, MT1G, MT1F	535	44	6879	2.63003	0.99423	0.308034	21.723
KEGG_PATHWAY	hsa03013:RNA transport	21	1.43149	0.0438439	XPOT, NCBP2, NXT1, GEMIN2, XPO5, EEF1A2, ALYREF, NUP85, TACC3, NUP155, NDC1, EIF4EBP1, SEH1L, PRMT5, EIF1AY, CYFIP2, POP1, POP4, NUP107, RPP40, POP7	535	172	6879	1.56987	0.999996	0.564354	44.6867
