# Supplementary material for: Identification of the hub genes in gastric cancer through weighted gene co-expression network analysis
Source: PeerJ. 2021 Mar 5;9:e10682. doi: 10.7717/peerj.10682 (PMC7938783; doi:10.7717/peerj.10682)
Supplement: Table S7 [file peerj-09-10682-s008.xls]

## Sheet: black KEGG 20200928
Category	Term	Count	%	PValue	Genes	List Total	Pop Hits	Pop Total	Fold Enrichment	Bonferroni	Benjamini	FDR
KEGG_PATHWAY	hsa04971:Gastric acid secretion	7	5.30303	4.46e-05	KCNJ16, KCNJ15, CCKBR, ATP4A, ATP4B, KCNE2, SST	63	73	6879	10.4703	0.00378189	0.00378189	0.0479479
KEGG_PATHWAY	hsa04974:Protein digestion and absorption	7	5.30303	0.000128	CELA3A, CELA3B, SLC16A10, COL6A5, CPA2, COL2A1, KCNJ13	63	88	6879	8.68561	0.010803	0.00541616	0.137386
KEGG_PATHWAY	hsa00982:Drug metabolism - cytochrome P450	5	3.78788	0.00316695	FMO4, UGT1A6, GSTA3, CYP2C8, ADH7	63	68	6879	8.02871	0.236329	0.0859524	3.35507
KEGG_PATHWAY	hsa05204:Chemical carcinogenesis	5	3.78788	0.0056762	UGT1A6, GSTA3, SULT2A1, CYP2C8, ADH7	63	80	6879	6.8244	0.383595	0.113933	5.94051
KEGG_PATHWAY	hsa00830:Retinol metabolism	4	3.0303	0.0196753	RDH12, UGT1A6, CYP2C8, ADH7	63	64	6879	6.8244	0.815309	0.286672	19.2483
KEGG_PATHWAY	hsa04610:Complement and coagulation cascades	4	3.0303	0.0239731	FGG, FGA, SERPINA5, C5	63	69	6879	6.32988	0.872869	0.290899	22.9767
KEGG_PATHWAY	hsa00980:Metabolism of xenobiotics by cytochrome P450	4	3.0303	0.0287402	UGT1A6, GSTA3, SULT2A1, ADH7	63	74	6879	5.90219	0.916148	0.298196	26.929
