# Supplementary material for: Identification of the hub genes in gastric cancer through weighted gene co-expression network analysis
Source: PeerJ. 2021 Mar 5;9:e10682. doi: 10.7717/peerj.10682 (PMC7938783; doi:10.7717/peerj.10682)
Supplement: Table S8 [file peerj-09-10682-s009.xls]

## Sheet: turquoise KEGG 20200928
Category	Term	Count	%	PValue	Genes	List Total	Pop Hits	Pop Total	Fold Enrichment	Bonferroni	Benjamini	FDR
KEGG_PATHWAY	hsa04510:Focal adhesion	47	2.27493	1.49e-07	SHC4, SHC2, LAMA2, ILK, PDGFA, LAMC2, PIK3R1, THBS4, MYLK, RELN, CCND2, CCND1, TNN, ERBB2, PDGFC, FLNA, PAK6, FLNB, FYN, FLNC, VAV3, JUN, PPP1R12A, LAMB3, COL24A1, LAMB2, PRKCB, ACTN2, CAV2, ITGA3, CAV1, ITGA2, ITGA1, PARVA, IGF1, PPP1CA, VEGFA, MAPK10, COL4A4, COL6A2, COL4A6, ITGA7, ITGA6, PPP1R12B, MET, MYL9, VCL	699	206	6879	2.24532	4.16e-05	4.16e-05	3.93e-05
KEGG_PATHWAY	hsa05412:Arrhythmogenic right ventricular cardiomyopathy (ARVC)	20	0.968054	2.27e-05	RYR2, TCF7L1, JUP, ITGA3, CACNA2D1, ITGA2, ITGA1, CACNA2D3, CACNB2, DES, SGCD, SGCA, PKP2, ITGA7, ITGA6, DMD, CTNNA3, CTNNA2, DSC2, SGCG	699	67	6879	2.93767	0.00632146	0.00317072	0.00300025
KEGG_PATHWAY	hsa04610:Complement and coagulation cascades	20	0.968054	3.58e-05	FGB, CFD, SERPINA1, CFH, C1S, F10, PROS1, C4BPA, C4BPB, TFPI, F3, F5, C3, F8, PROC, C7, BDKRB1, CD46, CD55, CFB	699	69	6879	2.85252	0.00993803	0.00332919	0.0031502
KEGG_PATHWAY	hsa05205:Proteoglycans in cancer	38	1.8393	0.000197	WNT2B, SDC4, SDC2, TWIST2, HSPB2, ITPR1, PIK3R1, FGF2, NRAS, CCND1, RRAS, CASP3, ERBB2, GPC3, FLNA, TIMP3, FLNB, FLNC, FZD3, PPP1R12A, FZD5, PRKCB, CAV2, FZD7, CAV1, ITGA2, RDX, RRAS2, ANK2, IGF1, DCN, MAPK13, PPP1CA, VEGFA, SDC1, EZR, PPP1R12B, MET	699	200	6879	1.86983	0.0534223	0.0137242	0.0129863
KEGG_PATHWAY	hsa05410:Hypertrophic cardiomyopathy (HCM)	19	0.919651	0.000636	RYR2, PRKAB2, PRKAA2, ITGA3, CACNA2D1, ITGA2, TPM1, ITGA1, CACNA2D3, IGF1, CACNB2, ACTC1, DES, SGCD, SGCA, ITGA7, ITGA6, DMD, SGCG	699	78	6879	2.39722	0.162542	0.0332559	0.0314679
KEGG_PATHWAY	hsa04360:Axon guidance	26	1.25847	0.000825	ROBO2, SEMA5A, ROBO3, SEMA3C, SEMA3A, SEMA3G, SEMA3E, EFNA5, GNAI1, RND1, NRAS, ABLIM3, DPYSL2, CFL2, PAK6, FYN, SLIT2, EPHA4, EPHA7, SEMA6A, SEMA4B, L1CAM, RHOD, CXCL12, MET, EPHA2	699	127	6879	2.01473	0.20566	0.0332559	0.0314679
KEGG_PATHWAY	hsa04512:ECM-receptor interaction	20	0.968054	0.000936	LAMA2, LAMB3, COL24A1, SDC4, LAMB2, ITGA3, ITGA2, ITGA1, LAMC2, HMMR, THBS4, RELN, SV2A, TNN, COL4A4, COL6A2, COL4A6, SDC1, ITGA7, ITGA6	699	87	6879	2.26235	0.229922	0.0332559	0.0314679
KEGG_PATHWAY	hsa04810:Regulation of actin cytoskeleton	37	1.7909	0.00105984	CHRM2, CHRM3, PDGFA, PIK3R1, FGF2, MYLK, FGF7, NRAS, FGF9, RRAS, CFL2, PDGFC, FGF20, PAK6, BDKRB1, WASF1, VAV3, PPP1R12A, ACTN2, ITGA3, ITGA2, RDX, ITGA1, RRAS2, PPP1CA, ENAH, ITGA7, ITGA6, EZR, FGF13, PPP1R12B, FGFR3, MYL9, VCL, FGF10, PFN2, ARHGEF6	699	210	6879	1.73393	0.256103	0.0332559	0.0314679
KEGG_PATHWAY	hsa04022:cGMP-PKG signaling pathway	30	1.45208	0.00107277	GUCY1B3, IRS1, ITPR1, IRS2, ATP1A2, ATP1A1, GNAI1, MYLK, RGS2, PLN, EDNRB, CREB3L4, KCNMB1, KCNMB4, PRKG1, GUCY1A3, MEF2C, PPP1R12A, KCNJ8, PDE2A, ATP2B4, PPP1CA, KCNMA1, PDE3A, AGTR1, PPIF, MRVI1, MYL9, SLC25A4, CREB5	699	158	6879	1.86858	0.258784	0.0332559	0.0314679
KEGG_PATHWAY	hsa00480:Glutathione metabolism	14	0.677638	0.00133892	GSTK1, GSTM3, G6PD, GSTO2, GSS, GSR, IDH2, MGST1, MGST2, GPX7, GSTT2, OPLAH, GCLM, GSTM5	699	51	6879	2.70151	0.311891	0.0339725	0.032146
KEGG_PATHWAY	hsa04270:Vascular smooth muscle contraction	24	1.16167	0.00133942	GUCY1A3, PPP1R14A, GUCY1B3, PPP1R12A, PRKCB, PRKCD, PLA2G4C, ITPR1, PLA2G5, ACTG2, PPP1CA, MYLK, ACTA2, CALD1, KCNMB1, KCNMA1, AGTR1, KCNMB4, PRKCQ, MRVI1, PPP1R12B, RAMP1, MYL9, PRKG1	699	117	6879	2.01871	0.311987	0.0339725	0.032146
KEGG_PATHWAY	hsa05200:Pathways in cancer	58	2.80736	0.00305018	WNT2B, SLC2A1, LAMC2, FGF2, GLI3, FGF7, EDNRB, FGF9, CCND1, CDH1, CASP3, BDKRB1, PRKCB, MMP1, ITGA3, ITGA2, FOS, AR, COL4A4, COL4A6, AGTR1, ITGA6, MET, CEBPA, CSF1R, LAMA2, LPAR1, PDGFA, LPAR4, PIK3R1, GNAI1, NRAS, ERBB2, FGF20, CTNNA3, CTNNA2, RUNX1T1, ARNT2, JUN, EGLN3, FZD3, TCF7L1, JUP, FZD5, LAMB3, NOS2, LAMB2, FZD7, ZBTB16, IGF1, GNG11, VEGFA, MAPK10, CXCL12, LPAR5, FGF13, FGFR3, FGF10	699	393	6879	1.45239	0.573567	0.0709166	0.0671039
KEGG_PATHWAY	hsa04015:Rap1 signaling pathway	35	1.69409	0.00381153	CSF1R, LPAR1, PDGFA, LPAR4, PIK3R1, EFNA5, SIPA1L2, FGF2, PRKCZ, GNAI1, PARD6B, FGF7, GRIN2A, NRAS, FGF9, RRAS, CDH1, PDGFC, FGF20, MAP2K6, PRKCI, ANGPT1, PRKCB, MAGI2, IGF1, MAPK13, VEGFA, LPAR5, PRKD1, FGF13, MET, FGFR3, FGF10, PFN2, EPHA2	699	210	6879	1.6402	0.655427	0.079659	0.0753762
KEGG_PATHWAY	hsa05414:Dilated cardiomyopathy	18	0.871249	0.00399722	RYR2, ITGA3, CACNA2D1, ITGA2, TPM1, ITGA1, CACNA2D3, IGF1, CACNB2, ACTC1, PLN, DES, SGCD, SGCA, ITGA7, ITGA6, DMD, SGCG	699	84	6879	2.10883	0.672891	0.079659	0.0753762
KEGG_PATHWAY	hsa05133:Pertussis	16	0.774443	0.00744334	JUN, NOS2, C1S, C4BPA, FOS, C4BPB, CXCL5, GNAI1, MAPK13, MAPK10, C3, PYCARD, IL1B, CASP3, CFL2, IRF8	699	75	6879	2.09946	0.875626	0.138446	0.131003
KEGG_PATHWAY	hsa04514:Cell adhesion molecules (CAMs)	25	1.21007	0.00819822	NLGN1, SDC4, NRXN1, SDC2, NRXN3, VTCN1, F11R, CDH1, NCAM1, CD99, JAM2, JAM3, NLGN4X, CADM1, NEGR1, HLA-B, L1CAM, HLA-F, SELP, CLDN5, CLDN10, CLDN4, CNTN1, SDC1, ITGA6	699	142	6879	1.73261	0.899413	0.142957	0.135271
KEGG_PATHWAY	hsa04024:cAMP signaling pathway	32	1.54889	0.0091118	CHRM2, GRIA2, RYR2, ATP1A2, ATP1A1, PIK3R1, PLD1, GNAI1, GLI3, GRIN2A, PLN, RRAS, CREB3L4, NPY, CNGA3, SOX9, VAV3, JUN, GABBR1, PPP1R12A, BDNF, NPY1R, ATP2B4, RRAS2, FOS, PPP1CA, MAPK10, PPP1R1B, PDE3A, MYL9, CFTR, CREB5	699	198	6879	1.5905	0.922218	0.149541	0.141501
KEGG_PATHWAY	hsa05100:Bacterial invasion of epithelial cells	16	0.774443	0.0107205	SHC4, SHC2, ARHGEF26, CAV2, CAV1, ILK, PIK3R1, DNM1, ARHGAP10, CDH1, ELMO1, CTNNA3, CTNNA2, WASF1, MET, VCL	699	78	6879	2.01871	0.950569	0.166168	0.157234
KEGG_PATHWAY	hsa04931:Insulin resistance	20	0.968054	0.0116123	PRKAB2, PRKAA2, IRS1, PRKCD, SLC2A1, NR1H3, IRS2, PIK3R1, PRKCZ, PPP1CA, MAPK10, PPP1R3C, TBC1D4, CREB3L4, RPS6KA1, SLC27A6, PRKCQ, SLC27A3, SLC27A2, CREB5	699	108	6879	1.82244	0.961565	0.170518	0.16135
KEGG_PATHWAY	hsa04151:PI3K-Akt signaling pathway	49	2.37173	0.01346	CHRM2, IRS1, LAMC2, FGF2, GHR, FGF7, CCND2, FGF9, CCND1, TNN, CREB3L4, ITGA3, ITGA2, ITGA1, COL4A4, COL6A2, COL4A6, ITGA7, ITGA6, MET, EPHA2, CREB5, CSF1R, PRKAA2, LAMA2, LPAR1, PDGFA, LPAR4, PIK3R1, EFNA5, IL2RG, THBS4, NRAS, RELN, PDGFC, FGF20, COL24A1, ANGPT1, LAMB3, LAMB2, PPP2R3A, IGF1, GNG11, VEGFA, LPAR5, IL7, FGF13, FGFR3, FGF10	699	345	6879	1.39774	0.977196	0.187767	0.177672
KEGG_PATHWAY	hsa05132:Salmonella infection	16	0.774443	0.018589	DYNC1I2, JUN, NOS2, IL18, FOS, CXCL3, MAPK13, MAPK10, PYCARD, IL1B, FLNA, FLNB, FLNC, WASF1, DYNC1I1, PFN2	699	83	6879	1.8971	0.994674	0.246757	0.233491
KEGG_PATHWAY	hsa05146:Amoebiasis	19	0.919651	0.0194576	SERPINB1, LAMA2, LAMB3, NOS2, COL24A1, LAMB2, PRKCB, ACTN2, HSPB1, LAMC2, PIK3R1, GNA14, GNAL, IL1B, CASP3, COL4A4, COL4A6, CTSG, VCL	699	106	6879	1.76399	0.99584	0.246757	0.233491
KEGG_PATHWAY	hsa04310:Wnt signaling pathway	23	1.11326	0.0210456	FZD3, JUN, TCF7L1, WNT2B, MMP7, FZD5, PRKCB, FZD7, PRICKLE2, PRICKLE1, CXXC4, MAPK10, DKK4, SFRP1, VANGL2, FRAT2, SFRP2, CCND2, SOX17, CCND1, DAAM2, WIF1, GPC4	699	138	6879	1.6402	0.997353	0.25385	0.240203
KEGG_PATHWAY	hsa04020:Calcium signaling pathway	28	1.35528	0.0225237	CHRM2, PTGFR, CHRM3, RYR2, PDE1A, HTR2B, ITPR1, HTR2A, RYR3, MYLK, GNA14, GRIN2A, CYSLTR1, PLN, EDNRB, ERBB2, BDKRB1, NOS2, PRKCB, TACR2, ATP2B4, PHKA1, ITPKC, GNAL, AGTR1, PPIF, PLCD4, SLC25A4	699	179	6879	1.53941	0.998264	0.25385	0.240203
KEGG_PATHWAY	hsa04911:Insulin secretion	16	0.774443	0.0227465	CHRM3, RYR2, SNAP25, PRKCB, SLC2A1, ATP1A2, ATP1A1, ADCYAP1, CREB3L4, KCNMB1, KCNMA1, KCNMB4, KCNN2, KCNN3, KCNN4, CREB5	699	85	6879	1.85246	0.998371	0.25385	0.240203
KEGG_PATHWAY	hsa05218:Melanoma	14	0.677638	0.0247383	PDGFA, PIK3R1, IGF1, FGF2, FGF7, NRAS, FGF9, CCND1, CDH1, PDGFC, FGF20, FGF13, MET, FGF10	699	71	6879	1.94052	0.999078	0.265461	0.251189
KEGG_PATHWAY	hsa04921:Oxytocin signaling pathway	24	1.16167	0.0282355	GUCY1A3, GUCY1B3, RYR2, JUN, MEF2C, PRKAB2, PPP1R12A, PRKAA2, PRKCB, CACNA2D1, PLA2G4C, CACNA2D3, ITPR1, FOS, GNAI1, RYR3, PPP1CA, MYLK, CACNB2, RGS2, NRAS, CCND1, PPP1R12B, MYL9	699	150	6879	1.57459	0.999662	0.291767	0.276081
KEGG_PATHWAY	hsa00980:Metabolism of xenobiotics by cytochrome P450	14	0.677638	0.033676	GSTK1, GSTM3, GSTO2, MGST1, DHDH, MGST2, GSTT2, AKR1C4, ALDH1A3, CYP2B6, CYP1B1, CYP2E1, GSTM5, CBR3	699	74	6879	1.86185	0.999929	0.332198	0.314338
KEGG_PATHWAY	hsa03320:PPAR signaling pathway	13	0.629235	0.0353158	MMP1, NR1H3, LPL, ILK, SORBS1, FABP3, FABP4, ACOX2, EHHADH, SLC27A6, PLIN1, PLTP, SLC27A2	699	67	6879	1.90949	0.999956	0.332198	0.314338
KEGG_PATHWAY	hsa04730:Long-term depression	12	0.580833	0.0368126	LYN, GUCY1A3, GUCY1B3, GRIA2, GNAZ, NRAS, PRKCB, PLA2G4C, ITPR1, IGF1, GNAI1, PRKG1	699	60	6879	1.96824	0.999971	0.332198	0.314338
KEGG_PATHWAY	hsa04750:Inflammatory mediator regulation of TRP channels	17	0.822846	0.0369109	TRPA1, PRKCB, PRKCD, PLA2G4C, ITPR1, HTR2B, PIK3R1, IGF1, HTR2A, MAPK13, PPP1CA, MAPK10, IL1B, P2RY2, BDKRB1, PRKCQ, MAP2K6	699	98	6879	1.70715	0.999972	0.332198	0.314338
KEGG_PATHWAY	hsa04670:Leukocyte transendothelial migration	19	0.919651	0.0406313	VAV3, PRKCB, ACTN2, PIK3R1, F11R, GNAI1, MAPK13, CLDN10, CLDN5, CLDN4, CXCL12, CTNNA3, CTNNA2, EZR, MYL9, CD99, VCL, JAM2, JAM3	699	115	6879	1.62594	0.999991	0.354254	0.335208
KEGG_PATHWAY	hsa00380:Tryptophan metabolism	9	0.435624	0.0445908	TDO2, ALDH1B1, AADAT, EHHADH, KYNU, CYP1B1, AOX1, OGDHL, INMT	699	40	6879	2.21427	0.999997	0.376995	0.356727
KEGG_PATHWAY	hsa04918:Thyroid hormone synthesis	13	0.629235	0.0474821	PRKCB, GSR, ITPR1, GPX7, ATP1A2, ATP1A1, PDIA4, ASGR2, CREB3L4, IYD, DUOXA2, SLC26A4, CREB5	699	70	6879	1.82765	0.999999	0.389632	0.368684
KEGG_PATHWAY	hsa04970:Salivary secretion	15	0.726041	0.0498653	GUCY1A3, SLC12A2, GUCY1B3, CHRM3, PRKCB, ATP2B4, ITPR1, ATP1A2, ATP1A1, MUC5B, RYR3, DMBT1, KCNMA1, KCNN4, PRKG1	699	86	6879	1.71649	0.999999	0.397498	0.376127
