# Supplementary material for: Identification of the hub genes in gastric cancer through weighted gene co-expression network analysis
Source: PeerJ. 2021 Mar 5;9:e10682. doi: 10.7717/peerj.10682 (PMC7938783; doi:10.7717/peerj.10682)
Supplement: Table S9 [file peerj-09-10682-s010.xls]

## Sheet: greenyellow KEGG 20200928
Category	Term	Count	%	PValue	Genes	List Total	Pop Hits	Pop Total	Fold Enrichment	Bonferroni	Benjamini	FDR
KEGG_PATHWAY	hsa04060:Cytokine-cytokine receptor interaction	19	10.1064	2.35e-08	CCR1, CSF3R, CXCL8, OSM, PPBP, INHBA, OSMR, TNFRSF1B, CSF2RA, IL1A, IL6, CCL8, IL2RA, TNFSF4, CCL4, CXCR2, CCL18, CCR3, CCL26	107	243	6879	5.02677	3.5e-06	3.5e-06	3.13e-06
KEGG_PATHWAY	hsa05146:Amoebiasis	10	5.31915	3.3e-05	COL1A1, IL6, CXCL8, COL4A1, COL11A1, COL5A2, LAMB1, SERPINB9, TLR4, TLR2	107	106	6879	6.06507	0.00490538	0.00245868	0.00219466
KEGG_PATHWAY	hsa05323:Rheumatoid arthritis	9	4.78723	5.65e-05	CD86, IL1A, IL6, CXCL8, CTSL, ACP5, TLR4, ICAM1, TLR2	107	88	6879	6.57508	0.00838185	0.00280565	0.00250437
KEGG_PATHWAY	hsa05152:Tuberculosis	12	6.38298	7.98e-05	IL1A, IL6, CEBPB, FCGR3B, FCER1G, CLEC7A, SPHK1, NOD2, CLEC4E, TLR4, FCGR2C, TLR2	107	177	6879	4.35863	0.0118269	0.00297423	0.00265485
KEGG_PATHWAY	hsa05150:Staphylococcus aureus infection	7	3.7234	0.000165	FCGR3B, C5AR1, FPR1, FPR3, FPR2, FCGR2C, ICAM1	107	54	6879	8.33385	0.024231	0.00490548	0.00437872
KEGG_PATHWAY	hsa04668:TNF signaling pathway	9	4.78723	0.000225	IL6, CEBPB, TNFAIP3, MAP3K8, NOD2, TNFRSF1B, PTGS2, MMP9, ICAM1	107	107	6879	5.40755	0.0329777	0.00558832	0.00498823
KEGG_PATHWAY	hsa04064:NF-kappa B signaling pathway	8	4.25532	0.000359	CXCL8, BCL2A1, PLAU, CCL4, TNFAIP3, PTGS2, TLR4, ICAM1	107	87	6879	5.9117	0.0521314	0.00764711	0.00682594
KEGG_PATHWAY	hsa04145:Phagosome	10	5.31915	0.000475	COMP, MSR1, FCGR3B, NCF2, CLEC7A, CTSL, OLR1, TLR4, FCGR2C, TLR2	107	150	6879	4.28598	0.0684091	0.00885558	0.00790465
KEGG_PATHWAY	hsa04062:Chemokine signaling pathway	11	5.85106	0.00055	FGR, CCR1, HCK, CCL8, CXCL8, CXCR2, CCL4, PPBP, CCL18, CCR3, CCL26	107	186	6879	3.80208	0.0787626	0.00911278	0.00813422
KEGG_PATHWAY	hsa05140:Leishmaniasis	7	3.7234	0.000739	IL1A, FCGR3B, NCF2, PTGS2, TLR4, FCGR2C, TLR2	107	71	6879	6.33842	0.104283	0.0109376	0.0097631
KEGG_PATHWAY	hsa05144:Malaria	6	3.19149	0.000879	COMP, IL6, CXCL8, TLR4, ICAM1, TLR2	107	49	6879	7.87221	0.122844	0.0109376	0.0097631
KEGG_PATHWAY	hsa04380:Osteoclast differentiation	9	4.78723	0.000881	IL1A, FCGR3B, TYROBP, NCF2, ACP5, LCP2, TREM2, LILRB2, FCGR2C	107	131	6879	4.41685	0.123053	0.0109376	0.0097631
KEGG_PATHWAY	hsa04512:ECM-receptor interaction	7	3.7234	0.00213641	COL1A1, COMP, COL4A1, COL11A1, COL5A2, LAMB1, CD44	107	87	6879	5.17274	0.272882	0.0244866	0.0218571
KEGG_PATHWAY	hsa04151:PI3K-Akt signaling pathway	14	7.44681	0.0023414	CSF3R, COL11A1, OSM, LAMB1, OSMR, COL1A1, COMP, IL6, COL4A1, IL2RA, COL5A2, KDR, TLR4, TLR2	107	345	6879	2.60886	0.294803	0.0249192	0.0222433
KEGG_PATHWAY	hsa05202:Transcriptional misregulation in cancer	9	4.78723	0.00408776	CD86, IL6, CEBPB, CXCL8, BCL2A1, BCL6, PLAU, IGFBP3, MMP9	107	167	6879	3.46472	0.456825	0.0406051	0.0362448
KEGG_PATHWAY	hsa04620:Toll-like receptor signaling pathway	7	3.7234	0.00570734	CD86, IL6, CXCL8, CCL4, MAP3K8, TLR4, TLR2	107	106	6879	4.24555	0.573793	0.0531496	0.0474422
KEGG_PATHWAY	hsa05134:Legionellosis	5	2.65957	0.00933232	IL6, CXCL8, HSPA6, TLR4, TLR2	107	54	6879	5.95275	0.752673	0.081795	0.0730116
KEGG_PATHWAY	hsa04640:Hematopoietic cell lineage	6	3.19149	0.0107522	IL1A, IL6, CSF3R, IL2RA, CSF2RA, CD44	107	87	6879	4.43377	0.800264	0.0874934	0.0780981
KEGG_PATHWAY	hsa04974:Protein digestion and absorption	6	3.19149	0.0112635	COL1A1, COL4A1, COL11A1, COL12A1, COL5A2, COL10A1	107	88	6879	4.38339	0.815072	0.0874934	0.0780981
KEGG_PATHWAY	hsa05205:Proteoglycans in cancer	9	4.78723	0.0117441	FZD2, PLAU, CTSL, PLAUR, KDR, TLR4, MMP9, CD44, TLR2	107	200	6879	2.89304	0.827994	0.0874934	0.0780981
KEGG_PATHWAY	hsa05162:Measles	7	3.7234	0.0164628	IL1A, IL6, IL2RA, HSPA6, TNFAIP3, TLR4, TLR2	107	133	6879	3.38367	0.915701	0.113006	0.100871
KEGG_PATHWAY	hsa05321:Inflammatory bowel disease (IBD)	5	2.65957	0.0166854	IL1A, IL6, NOD2, TLR4, TLR2	107	64	6879	5.02263	0.918496	0.113006	0.100871
KEGG_PATHWAY	hsa05132:Salmonella infection	5	2.65957	0.0387272	IL1A, IL6, CXCL8, CCL4, TLR4	107	83	6879	3.87287	0.997219	0.250885	0.223944
