# Supplementary material for: Identification of the hub genes in gastric cancer through weighted gene co-expression network analysis
Source: PeerJ. 2021 Mar 5;9:e10682. doi: 10.7717/peerj.10682 (PMC7938783; doi:10.7717/peerj.10682)
Supplement: Table S10 [file peerj-09-10682-s011.xls]

## Sheet: salmon KEGG 20201112
Category	Term	Count	%	PValue	Genes	List Total	Pop Hits	Pop Total	Fold Enrichment	Bonferroni	Benjamini	FDR
KEGG_PATHWAY	hsa05164:Influenza A	11	18.3333	1.09487e-09	IFIH1, CXCL10, IFNG, RSAD2, DDX58, STAT1, OAS2, MX1, CASP1, TNFSF10, JAK2	30	174	6879	14.496	7.00717e-08	7.00718e-08	6.02179e-08
KEGG_PATHWAY	hsa05162:Measles	8	13.3333	9.43903e-07	IFIH1, IFNG, DDX58, STAT1, OAS2, MX1, TNFSF10, JAK2	30	133	6879	13.7925	6.0408e-05	3.02049e-05	2.59573e-05
KEGG_PATHWAY	hsa05168:Herpes simplex infection	8	13.3333	7.99332e-06	IFIH1, IFNG, DDX58, STAT1, OAS2, TAP1, JAK2, IFIT1	30	183	6879	10.024	0.000511444	0.000170524	0.000146544
KEGG_PATHWAY	hsa05160:Hepatitis C	5	8.33333	0.00217994	DDX58, STAT1, OAS2, IRF1, IFIT1	30	133	6879	8.6203	0.130353	0.0302303	0.0259792
KEGG_PATHWAY	hsa04623:Cytosolic DNA-sensing pathway	4	6.66667	0.00236174	CXCL10, AIM2, DDX58, CASP1	30	64	6879	14.3313	0.140436	0.0302303	0.0259792
KEGG_PATHWAY	hsa04622:RIG-I-like receptor signaling pathway	4	6.66667	0.0030508	IFIH1, CXCL10, DDX58, ISG15	30	70	6879	13.1029	0.177617	0.0325419	0.0279657
KEGG_PATHWAY	hsa04612:Antigen processing and presentation	4	6.66667	0.00385217	IFNG, KLRC3, TAP1, CTSS	30	76	6879	12.0684	0.218871	0.0352198	0.030267
KEGG_PATHWAY	hsa04062:Chemokine signaling pathway	5	8.33333	0.00724116	CXCL10, CXCL11, CXCL9, STAT1, JAK2	30	186	6879	6.16398	0.371941	0.0579293	0.049783
KEGG_PATHWAY	hsa04620:Toll-like receptor signaling pathway	4	6.66667	0.00971388	CXCL10, CXCL11, CXCL9, STAT1	30	106	6879	8.65283	0.464593	0.0690765	0.0593626
KEGG_PATHWAY	hsa03050:Proteasome	3	5	0.0145504	IFNG, PSMB10, PSMB9	30	44	6879	15.6341	0.608615	0.0931223	0.0800269
KEGG_PATHWAY	hsa04060:Cytokine-cytokine receptor interaction	5	8.33333	0.0180137	CXCL10, CXCL11, CXCL9, IFNG, TNFSF10	30	243	6879	4.71811	0.687574	0.104807	0.0900685
KEGG_PATHWAY	hsa04917:Prolactin signaling pathway	3	5	0.035642	STAT1, IRF1, JAK2	30	71	6879	9.68873	0.901995	0.17137	0.147271
KEGG_PATHWAY	hsa05140:Leishmaniasis	3	5	0.035642	IFNG, STAT1, JAK2	30	71	6879	9.68873	0.901995	0.17137	0.147271
KEGG_PATHWAY	hsa05152:Tuberculosis	4	6.66667	0.0374872	IFNG, STAT1, JAK2, CTSS	30	177	6879	5.18192	0.9133	0.17137	0.147271
