# Supplementary material for: Identification of the hub genes in gastric cancer through weighted gene co-expression network analysis
Source: PeerJ. 2021 Mar 5;9:e10682. doi: 10.7717/peerj.10682 (PMC7938783; doi:10.7717/peerj.10682)
Supplement: Table S11 [file peerj-09-10682-s012.xls]

## Sheet: Sheet1
genesymbol	logFC	AveExpr	t	P.Value	adj.P.Val	B
GUCY1A3	-1.11244	7.10416	-7.79449	5.57e-14	1.12e-13	20.2452
SELM	-1.02961	8.80161	-8.99903	9.1e-18	2.07e-17	28.8592
MN1	-1.24853	5.90115	-9.13332	3.27e-18	7.6e-18	29.8717
CXCL11	1.94116	7.06466	9.3454	6.38e-19	1.51e-18	31.4906
IDO1	1.77813	8.17248	9.36335	5.55e-19	1.32e-18	31.6287
TMEM55A	-1.04485	6.64465	-9.43868	3.08e-19	7.39e-19	32.2103
COL21A1	-1.52481	5.96768	-9.62844	6.94e-20	1.71e-19	33.6882
PBX3	-1.02574	8.15348	-9.75203	2.6e-20	6.52e-20	34.6606
SYNC	-1.67758	5.91066	-9.78895	1.94e-20	4.87e-20	34.9526
TGFB1I1	-1.28761	8.68057	-9.93228	6.13e-21	1.57e-20	36.0925
ITGA1	-1.17622	6.12603	-10.0016	3.5e-21	9.06e-21	36.6477
CCL4	1.42566	8.683	10.2568	4.38e-22	1.17e-21	38.7102
WARS	1.10948	8.94172	10.4435	9.38e-23	2.55e-22	40.2389
CXCL10	1.65613	9.09989	10.4636	7.94e-23	2.17e-22	40.4043
CLMP	-1.42465	6.09162	-10.567	3.36e-23	9.3e-23	41.2583
MGP	-1.49317	7.00023	-10.5741	3.17e-23	8.78e-23	41.3168
GZMB	1.51724	7.43109	10.6364	1.88e-23	5.24e-23	41.834
FIBIN	-1.2759	6.58071	-10.7242	9e-24	2.54e-23	42.5655
RGS4	-1.16887	5.27151	-10.7534	7.04e-24	1.99e-23	42.8102
CILP	-1.5466	6.42704	-10.7979	4.84e-24	1.38e-23	43.1825
FLNA	-1.24248	7.19438	-10.8126	4.27e-24	1.22e-23	43.3059
AL832909 /// LINC00984	-1.08691	7.32076	-10.8496	3.12e-24	8.98e-24	43.6168
SCRG1	-1.4387	4.23658	-10.967	1.15e-24	3.36e-24	44.6067
CDCA5	1.0199	7.23044	10.9806	1.03e-24	3e-24	44.7219
CYP1B1	-1.55432	6.08004	-10.9895	9.52e-25	2.78e-24	44.7968
GATA6-AS1	-1.63892	6.60373	-11.0464	5.86e-25	1.72e-24	45.2792
ZNF667-AS1	-1.42062	5.84385	-11.2056	1.49e-25	4.47e-25	46.6357
TIMP3	-1.16431	7.5793	-11.2729	8.37e-26	2.52e-25	47.2121
MPPED2	-1.027	3.7358	-11.3543	4.14e-26	1.26e-25	47.9119
EPSTI1	1.17856	8.40342	11.4987	1.18e-26	3.65e-26	49.1595
OLFML3	-1.38032	7.61803	-11.5192	9.86e-27	3.07e-26	49.3375
INMT	-1.33895	5.81335	-11.5403	8.21e-27	2.56e-26	49.5199
GHRL	-1.43333	5.24539	-11.5884	5.39e-27	1.69e-26	49.9385
FRZB	-1.17864	5.41826	-11.6487	3.18e-27	9.98e-27	50.4636
NRXN3	-1.655	5.41635	-11.6555	2.99e-27	9.41e-27	50.5228
MEIS1	-1.46171	6.74873	-11.6829	2.35e-27	7.42e-27	50.7619
PPP1R14A	-1.679	6.22917	-11.7587	1.21e-27	3.84e-27	51.4254
MBNL1-AS1	-1.75705	5.89251	-11.7866	9.44e-28	3.02e-27	51.6699
FERMT2	-1.4801	7.79282	-11.8076	7.84e-28	2.52e-27	51.8548
ZNF542P	-1.13822	4.87745	-11.8419	5.79e-28	1.87e-27	52.1563
MPDZ	-1.38838	7.00527	-11.8954	3.6e-28	1.17e-27	52.6273
VGLL3	-1.4156	5.04489	-11.9582	2.06e-28	6.75e-28	53.1814
COX7A1	-1.39567	7.77411	-11.9811	1.68e-28	5.52e-28	53.3836
KCNJ15	-1.38942	5.58354	-11.9826	1.66e-28	5.45e-28	53.397
PDLIM3	-1.39995	6.04962	-11.9995	1.43e-28	4.7e-28	53.5461
POPDC2	-1.49715	4.68399	-12.0603	8.32e-29	2.76e-28	54.0849
SNAP25	-1.09642	4.64384	-12.0897	6.4e-29	2.13e-28	54.3464
LINC01094	1.24958	4.17263	12.0978	5.95e-29	1.98e-28	54.4176
MFSD4	-1.55025	6.01967	-12.1463	3.86e-29	1.3e-28	54.8491
SERTAD4-AS1	-1.37092	6.13607	-12.1517	3.68e-29	1.24e-28	54.8971
BCL2A1	2.06531	8.24119	12.1654	3.25e-29	1.1e-28	55.0191
SALL2	-1.19647	5.89112	-12.1678	3.18e-29	1.07e-28	55.0404
PKD2	-1.26734	7.66936	-12.2172	2.04e-29	6.97e-29	55.4807
LINC00702	-1.67785	3.68134	-12.2466	1.57e-29	5.38e-29	55.7437
FXYD6	-1.40611	7.01538	-12.2998	9.73e-30	3.36e-29	56.2195
CPED1	-1.28912	6.61357	-12.3865	4.45e-30	1.56e-29	56.9971
DPP10	-1.00757	3.00093	-12.3969	4.06e-30	1.43e-29	57.0897
MAP1B	-1.3834	6.36105	-12.3993	3.97e-30	1.4e-29	57.1117
NUDT11	-1.23677	4.95038	-12.4028	3.85e-30	1.36e-29	57.1427
COLEC12	-1.74916	6.72536	-12.4496	2.52e-30	8.95e-30	57.5636
MCEMP1	1.28232	5.38348	12.4821	1.88e-30	6.71e-30	57.8569
ITGB1BP2	-1.1853	5.07673	-12.5033	1.55e-30	5.55e-30	58.048
GPR84	1.47762	4.55583	12.5631	9e-31	3.27e-30	58.5874
MAP7	1.17931	7.68737	12.5711	8.37e-31	3.04e-30	58.6596
FAM229B	-1.36516	6.68083	-12.5819	7.59e-31	2.77e-30	58.7571
CRYAB	-1.80184	7.12085	-12.5935	6.83e-31	2.49e-30	58.862
TMEM47	-1.54598	8.38954	-12.6067	6.06e-31	2.22e-30	58.9816
CYS1	-1.74601	4.77759	-12.6294	4.93e-31	1.81e-30	59.1875
FLNC	-1.59188	7.4908	-12.6421	4.39e-31	1.62e-30	59.3026
KCNE2	-2.67737	7.19186	-12.6517	4.02e-31	1.49e-30	59.3894
GYPC	-1.00873	7.76663	-12.6572	3.82e-31	1.41e-30	59.4396
HCAR3	2.92136	6.96063	12.6899	2.84e-31	1.05e-30	59.7362
FOXF1	-1.51942	8.57954	-12.7556	1.56e-31	5.81e-31	60.3326
PRUNE2	-1.77891	5.4013	-12.7683	1.39e-31	5.18e-31	60.4486
LRCH2	-1.47483	5.04536	-12.7699	1.37e-31	5.11e-31	60.463
STON1	-1.12259	5.21338	-12.8413	7.11e-32	2.68e-31	61.1132
BNC2	-1.21467	4.84576	-12.8423	7.05e-32	2.66e-31	61.1226
NEXN	-2.10262	7.73631	-12.854	6.33e-32	2.4e-31	61.2293
TRPC1	-1.37752	5.03156	-12.8542	6.32e-32	2.4e-31	61.2312
LOC101928409	-1.32508	4.34571	-12.8716	5.38e-32	2.05e-31	61.3903
TAGLN	-1.78736	8.48286	-12.9057	3.94e-32	1.5e-31	61.7016
CAP2	-1.92749	6.4844	-12.907	3.89e-32	1.48e-31	61.7138
AKAP12	-1.48328	6.04747	-12.9084	3.84e-32	1.47e-31	61.7264
CNRIP1	-1.35511	7.88587	-12.91	3.79e-32	1.45e-31	61.7409
MAPK13	1.32446	8.27948	12.9122	3.71e-32	1.42e-31	61.7609
GAS1	-1.34939	5.55057	-12.9142	3.64e-32	1.4e-31	61.7789
CCDC80	-1.9189	6.21455	-12.9261	3.26e-32	1.25e-31	61.8884
NDN	-1.63129	7.31633	-12.9846	1.91e-32	7.37e-32	62.4235
ADH7	-1.49963	4.26563	-13.0119	1.48e-32	5.76e-32	62.6741
CAV1	-1.4236	10.0196	-13.0566	9.82e-33	3.83e-32	63.0839
MRVI1	-1.38307	6.20902	-13.1459	4.3e-33	1.7e-32	63.9057
STAT1	1.16134	8.49023	13.1741	3.31e-33	1.31e-32	64.1653
HN1	1.12831	9.74996	13.2037	2.52e-33	1e-32	64.4377
TCF7L1	-1.06056	5.51786	-13.2196	2.17e-33	8.67e-33	64.5846
DCN	-1.11043	7.82409	-13.2278	2.01e-33	8.06e-33	64.6608
TSPAN18	-1.13884	5.72967	-13.2647	1.43e-33	5.75e-33	65.0013
MELK	1.54225	8.74574	13.3009	1.02e-33	4.14e-33	65.3357
ARMCX1	-1.69318	7.70597	-13.3579	6.02e-34	2.45e-33	65.8637
KNSTRN	1.05634	7.5563	13.3584	5.99e-34	2.44e-33	65.8685
WISP1	1.17464	4.92413	13.3914	4.41e-34	1.8e-33	66.1742
CHRNA3	-1.01883	5.02007	-13.3957	4.23e-34	1.74e-33	66.2138
GIF	-4.50922	7.40726	-13.4524	2.49e-34	1.03e-33	66.741
SHCBP1	1.36457	6.40732	13.4534	2.47e-34	1.02e-33	66.7505
FAM46B	-1.40873	5.43879	-13.474	2.04e-34	8.44e-34	66.9414
TMTC1	-1.09175	5.53888	-13.5766	7.81e-35	3.27e-34	67.8972
BEX4	-1.80623	7.36878	-13.6017	6.18e-35	2.59e-34	68.1308
DONSON	1.07306	7.268	13.7325	1.81e-35	7.68e-35	69.3537
LAMA2	-1.02215	5.6294	-13.7603	1.39e-35	5.95e-35	69.6141
FAM129A	-1.85561	8.50758	-13.7857	1.1e-35	4.7e-35	69.8517
SPARCL1	-1.56092	11.4193	-13.8023	9.38e-36	4.03e-35	70.0073
ANGPT1	-1.03109	4.87199	-13.8631	5.29e-36	2.29e-35	70.5786
EPCAM	1.81651	12.3645	13.8957	3.89e-36	1.69e-35	70.8847
DPY19L2	-1.07128	3.62361	-13.9505	2.32e-36	1.02e-35	71.4008
LMOD1	-1.82291	6.2052	-14.0075	1.35e-36	5.98e-36	71.9375
FCGR1B	1.82554	6.62025	14.0641	7.9e-37	3.53e-36	72.4717
MSRB3	-1.58886	6.80568	-14.0823	6.65e-37	2.98e-36	72.6433
HSPB3	-1.49262	4.28575	-14.0851	6.48e-37	2.9e-36	72.6701
LOC100507165	-1.57993	4.18812	-14.1016	5.54e-37	2.49e-36	72.8257
KRT18	1.69998	12.0351	14.1175	4.76e-37	2.15e-36	72.9764
EBF1	-1.19052	5.41128	-14.1271	4.35e-37	1.97e-36	73.0665
CFL2	-1.96684	7.47568	-14.1751	2.76e-37	1.26e-36	73.5205
MAGEH1	-1.2923	7.91962	-14.1752	2.76e-37	1.26e-36	73.5216
NBEA	-2.02848	5.91374	-14.1745	2.77e-37	1.26e-36	73.5152
RDH12	-1.67201	5.31482	-14.2023	2.13e-37	9.74e-37	73.7786
ARHGEF26-AS1	-1.12306	3.14007	-14.2467	1.4e-37	6.42e-37	74.1997
CSRP1	-1.59013	9.76618	-14.2609	1.22e-37	5.62e-37	74.3339
SH3BGR	-1.59004	6.09799	-14.2913	9.13e-38	4.25e-37	74.6225
MYEF2	-1.34154	4.45559	-14.292	9.07e-38	4.23e-37	74.629
SUSD5	-1.30174	3.39576	-14.2923	9.04e-38	4.22e-37	74.6316
MCM7	1.06217	8.29154	14.3042	8.07e-38	3.78e-37	74.7451
KIAA1377	-1.09141	4.07639	-14.3235	6.72e-38	3.15e-37	74.9281
KGFLP2	-1.46673	4.33105	-14.3376	5.87e-38	2.76e-37	75.0623
ADAMTS1	-1.63975	7.74113	-14.3843	3.76e-38	1.78e-37	75.5064
EFS	-1.06161	5.51235	-14.3893	3.58e-38	1.7e-37	75.5542
CLEC5A	2.11554	4.60811	14.4023	3.16e-38	1.51e-37	75.6776
ASB2	-1.32756	5.39986	-14.4067	3.04e-38	1.45e-37	75.7192
PABPC4L	-1.4297	4.36233	-14.4153	2.8e-38	1.34e-37	75.8008
EML1	-1.9558	6.45718	-14.4237	2.58e-38	1.23e-37	75.8808
MRGPRF	-2.29594	6.75009	-14.4277	2.48e-38	1.19e-37	75.9196
CDCA3	1.45419	7.60614	14.4541	1.93e-38	9.29e-38	76.1704
MYL9	-1.56843	6.3436	-14.4915	1.35e-38	6.55e-38	76.527
SMPX	-3.22598	4.91037	-14.4952	1.3e-38	6.32e-38	76.5625
LINC01279	-2.95142	6.42278	-14.5102	1.13e-38	5.49e-38	76.705
CCDC146	-2.01301	6.19124	-14.5186	1.04e-38	5.07e-38	76.7853
FAXC	-1.65233	4.12125	-14.5861	5.45e-39	2.69e-38	77.4301
DES	-1.43332	5.04313	-14.5911	5.2e-39	2.57e-38	77.4779
MIR100HG	-2.86528	6.00602	-14.6015	4.7e-39	2.33e-38	77.5772
TSPAN2	-1.69957	5.63027	-14.6026	4.65e-39	2.31e-38	77.5878
DDR2	-1.32864	6.36526	-14.605	4.55e-39	2.26e-38	77.611
C1QTNF2	-1.6265	4.93208	-14.6589	2.71e-39	1.35e-38	78.1257
PLCD4	-1.13826	4.01799	-14.6948	1.92e-39	9.65e-39	78.4696
TAC1	-3.05114	4.0224	-14.7155	1.57e-39	7.92e-39	78.668
CCDC69	-1.81508	6.62219	-14.808	6.47e-40	3.27e-39	79.5544
HMMR	1.8718	8.40818	14.8284	5.31e-40	2.69e-39	79.7512
CENPW	1.30294	9.15449	14.8343	5.02e-40	2.55e-39	79.8074
FBLN1	-1.33312	6.20913	-14.8363	4.92e-40	2.5e-39	79.8266
KLHL41	-1.12087	3.36119	-14.9125	2.36e-40	1.21e-39	80.5593
RAD54B	1.33879	6.80333	14.9336	1.92e-40	9.88e-40	80.7623
KIAA1644	-1.349	5.29161	-14.9607	1.48e-40	7.65e-40	81.0229
LOC728392	-1.63279	6.36976	-14.965	1.42e-40	7.34e-40	81.0643
PTN	-1.32999	6.22765	-14.97	1.35e-40	7.02e-40	81.1122
PRICKLE2	-1.83853	6.33021	-14.9912	1.1e-40	5.73e-40	81.3164
OLR1	2.24293	5.03518	15.034	7.3e-41	3.82e-40	81.729
TTK	1.99113	7.73438	15.0424	6.73e-41	3.53e-40	81.8098
SLIT2	-2.0902	5.34251	-15.1076	3.58e-41	1.9e-40	82.4391
PPAT	1.01887	7.44625	15.1519	2.33e-41	1.25e-40	82.8668
ERO1L	1.19499	9.08987	15.2167	1.24e-41	6.72e-41	83.4928
TAP1	1.30249	9.86185	15.219	1.22e-41	6.6e-41	83.5149
MXRA7	-1.4646	7.32592	-15.2328	1.06e-41	5.81e-41	83.6482
A2M-AS1	-1.35826	4.66295	-15.2613	8.06e-42	4.43e-41	83.9246
FAM228B	-1.36847	6.35937	-15.2773	6.9e-42	3.81e-41	84.079
RACGAP1	1.14281	9.34212	15.2932	5.92e-42	3.27e-41	84.2331
NAP1L3	-2.46727	5.07025	-15.3435	3.63e-42	2.03e-41	84.7208
LOH12CR2	-1.02914	4.5346	-15.4028	2.04e-42	1.15e-41	85.2951
OMD	-2.34462	4.57613	-15.4045	2e-42	1.13e-41	85.3119
RFC3	1.08487	6.40021	15.4211	1.71e-42	9.68e-42	85.473
RERG	-2.57261	6.08086	-15.4347	1.49e-42	8.5e-42	85.6056
SMC2	1.09284	7.39696	15.4364	1.47e-42	8.37e-42	85.6215
ITGA8	-1.27688	5.68274	-15.4677	1.08e-42	6.19e-42	85.9252
CHIA	-3.19813	4.91748	-15.4983	8.04e-43	4.62e-42	86.2224
KCNA1	-1.20795	4.15106	-15.5082	7.3e-43	4.21e-42	86.3192
MYOCD	-2.35227	6.12847	-15.508	7.31e-43	4.21e-42	86.317
NLGN1	-1.3062	3.43566	-15.5461	5.04e-43	2.92e-42	86.6875
CWH43	-1.97953	4.33135	-15.5628	4.29e-43	2.5e-42	86.8498
MSH2	1.26699	7.8698	15.6077	2.77e-43	1.62e-42	87.2867
CNN1	-3.37014	7.99734	-15.6152	2.57e-43	1.51e-42	87.3594
TCEAL7	-2.33359	5.94164	-15.6339	2.14e-43	1.26e-42	87.5417
BORA	1.52267	7.67559	15.6572	1.7e-43	1.01e-42	87.7692
PBK	2.33564	8.63671	15.7033	1.09e-43	6.48e-43	88.2182
KIF18A	1.74516	6.11426	15.722	9.04e-44	5.43e-43	88.4009
SKP2	1.0606	5.89296	15.7484	6.99e-44	4.23e-43	88.6576
CPE	-2.35919	8.10271	-15.7492	6.94e-44	4.2e-43	88.6656
TACR2	-1.7124	5.3575	-15.753	6.68e-44	4.05e-43	88.7028
ESPL1	1.27463	6.99751	15.7612	6.16e-44	3.75e-43	88.7831
FGF2	-1.72494	4.91353	-15.7649	5.94e-44	3.62e-43	88.8194
CHEK1	1.15134	6.16542	15.7929	4.52e-44	2.77e-43	89.0921
PENK	-1.42116	4.69812	-15.8156	3.62e-44	2.23e-43	89.3136
POLE2	1.48721	7.47	15.8202	3.46e-44	2.13e-43	89.3585
ARHGEF26	-1.93058	4.56392	-15.833	3.05e-44	1.88e-43	89.4842
LOC101928731	-1.13147	3.25806	-15.8756	2.01e-44	1.25e-43	89.9004
DOCK3	-1.06203	3.92298	-15.8835	1.86e-44	1.16e-43	89.9777
PSRC1	1.38621	6.36606	15.8886	1.77e-44	1.11e-43	90.0274
RAB9B	-1.70466	5.72021	-15.8936	1.68e-44	1.05e-43	90.0764
GPM6B	-2.3838	5.44494	-15.9229	1.26e-44	7.93e-44	90.3628
CDKN3	1.79683	8.1728	15.9248	1.24e-44	7.81e-44	90.3808
IGSF11	-1.43093	3.82815	-15.927	1.21e-44	7.65e-44	90.4026
GINS3	1.06964	6.13251	15.9391	1.08e-44	6.82e-44	90.5213
PDE2A	-1.04773	5.86861	-15.9605	8.74e-45	5.54e-44	90.7308
RRM2	2.12281	9.91075	15.9904	6.52e-45	4.17e-44	91.0228
GLRB	-1.3724	3.87024	-15.9928	6.37e-45	4.08e-44	91.0461
DZIP1	-1.79809	5.05222	-15.9971	6.11e-45	3.92e-44	91.0882
DAAM2	-1.47888	6.14259	-16.006	5.6e-45	3.6e-44	91.1755
SPINT2	1.52933	10.8597	16.0177	4.99e-45	3.21e-44	91.2901
CDC7	1.35908	7.28495	16.024	4.69e-45	3.02e-44	91.3516
C8orf88	-2.35874	5.16367	-16.0313	4.36e-45	2.82e-44	91.424
KIF20A	1.73249	7.14577	16.0371	4.12e-45	2.67e-44	91.4804
TCF19	1.11858	6.78528	16.037	4.13e-45	2.67e-44	91.4792
ZNF423	-1.80006	6.03455	-16.0655	3.12e-45	2.02e-44	91.7586
FILIP1	-2.27632	4.9742	-16.0678	3.05e-45	1.98e-44	91.7808
RFC4	1.04144	8.80689	16.1007	2.21e-45	1.45e-44	92.1037
ROR2	-1.54617	5.11463	-16.1073	2.07e-45	1.36e-44	92.1687
BRCA2	1.2382	4.86701	16.1225	1.78e-45	1.17e-44	92.3172
ZWINT	1.71766	9.72128	16.1487	1.38e-45	9.12e-45	92.5748
C14orf132	-1.7828	6.07371	-16.1569	1.27e-45	8.43e-45	92.6548
SMOC2	-2.0887	6.69034	-16.1922	8.97e-46	6.01e-45	93.0015
AOX1	-1.54531	5.35992	-16.1991	8.37e-46	5.63e-45	93.0694
PDZRN3-AS1	-1.10755	4.48185	-16.2475	5.2e-46	3.52e-45	93.5445
FRY	-1.25458	5.43922	-16.2661	4.33e-46	2.94e-45	93.7272
KCNMA1	-1.61384	4.80134	-16.2706	4.14e-46	2.82e-45	93.7717
ZFPM2	-2.55896	5.44598	-16.2831	3.66e-46	2.5e-45	93.8937
PPAP2C	1.66489	8.08062	16.2909	3.39e-46	2.31e-45	93.9713
ANGPTL7	-1.20971	4.39768	-16.334	2.22e-46	1.52e-45	94.3947
NUP155	1.08781	7.46793	16.3461	1.97e-46	1.36e-45	94.5138
ATP4A	-3.89313	6.31601	-16.3726	1.52e-46	1.05e-45	94.7741
CPA2	-2.69217	6.11256	-16.3813	1.39e-46	9.65e-46	94.8602
KCNJ16	-2.2327	4.22357	-16.3939	1.23e-46	8.53e-46	94.9841
PLCL1	-1.33491	4.18892	-16.4073	1.08e-46	7.5e-46	95.1161
MFAP4	-1.80181	6.85382	-16.4144	1e-46	7e-46	95.1858
KIAA0101	1.4652	8.60597	16.4403	7.77e-47	5.47e-46	95.4401
ARHGAP11A	1.37108	4.76409	16.4653	6.07e-47	4.27e-46	95.6872
ACTG2	-1.67882	7.21623	-16.4812	5.19e-47	3.66e-46	95.8432
C1QBP	1.12062	10.4969	16.4955	4.51e-47	3.2e-46	95.984
NUSAP1	1.78203	7.92058	16.4978	4.4e-47	3.13e-46	96.0066
KCNK3	-1.10821	5.02078	-16.51	3.9e-47	2.78e-46	96.127
MCC	-1.17529	6.29742	-16.5655	2.25e-47	1.62e-46	96.6744
CXCL12	-2.14383	7.55453	-16.6039	1.54e-47	1.12e-46	97.0533
KIF11	1.82877	7.81464	16.6429	1.05e-47	7.62e-47	97.4382
ABCA8	-1.21496	4.48786	-16.6442	1.04e-47	7.53e-47	97.4505
AOC3	-2.50588	7.536	-16.6515	9.63e-48	7.02e-47	97.5227
AMPH	-1.51649	4.85754	-16.6654	8.4e-48	6.14e-47	97.6595
BUB1B	1.76923	8.33999	16.672	7.86e-48	5.75e-47	97.7249
POLQ	1.11815	5.66259	16.6824	7.09e-48	5.2e-47	97.8278
RFWD3	1.11576	6.58244	16.6919	6.46e-48	4.74e-47	97.9217
STIP1	1.03872	7.30634	16.773	2.89e-48	2.15e-47	98.7225
NIP7	1.04315	7.7178	16.7806	2.68e-48	2e-47	98.7977
FEN1	1.30595	8.62972	16.8148	1.91e-48	1.43e-47	99.1357
CENPE	1.71926	7.32306	16.8262	1.71e-48	1.28e-47	99.2484
NUDT15	1.00995	9.42726	16.8301	1.64e-48	1.23e-47	99.2876
ADAM12	1.18981	4.88555	16.8534	1.3e-48	9.84e-48	99.5173
CCNE2	1.78386	6.25429	16.8558	1.27e-48	9.62e-48	99.541
RPP40	1.11534	8.03244	16.8597	1.22e-48	9.26e-48	99.5803
ASB5	-3.33841	3.88962	-16.8644	1.17e-48	8.86e-48	99.6263
CDCP1	1.01972	5.76898	16.9269	6.29e-49	4.79e-48	100.245
SDPR	-1.88536	6.5796	-16.9326	5.94e-49	4.53e-48	100.302
KNTC1	1.06998	6.61438	16.992	3.29e-49	2.53e-48	100.89
MGME1	1.00111	8.68505	16.9953	3.19e-49	2.46e-48	100.922
HOMER2	-1.68111	4.65902	-17.0401	2.04e-49	1.58e-48	101.366
IPO4	1.09245	6.98014	17.0719	1.49e-49	1.16e-48	101.682
CDC45	1.49184	6.56948	17.0778	1.4e-49	1.09e-48	101.74
SAC3D1	1.00202	7.9728	17.104	1.08e-49	8.44e-49	101.999
SCARA3	-1.19241	4.92144	-17.1266	8.65e-50	6.77e-49	102.224
RCAN2	-2.29318	7.99971	-17.1452	7.18e-50	5.64e-49	102.408
FBXO5	1.29191	7.15322	17.1455	7.16e-50	5.63e-49	102.411
CASC5	1.14268	4.95564	17.1786	5.15e-50	4.08e-49	102.74
PDE1A	-1.27102	4.45987	-17.2377	2.86e-50	2.28e-49	103.327
CCNB1	2.03434	8.3395	17.2484	2.57e-50	2.05e-49	103.432
PEG3	-2.52688	4.50542	-17.2522	2.48e-50	1.98e-49	103.471
LRFN5	-1.26415	4.18387	-17.258	2.34e-50	1.88e-49	103.527
PLAU	1.89653	7.12308	17.2743	1.99e-50	1.61e-49	103.689
BCHE	-3.22135	4.7313	-17.2783	1.91e-50	1.54e-49	103.73
NCAPG	1.93297	7.49418	17.2831	1.82e-50	1.48e-49	103.777
CKAP2L	1.46225	6.50487	17.2946	1.63e-50	1.32e-49	103.891
LOC101929787	-1.77907	5.8978	-17.2944	1.63e-50	1.32e-49	103.889
SMAD9	-1.46926	5.70428	-17.2979	1.57e-50	1.28e-49	103.924
SGOL2	1.53397	7.13821	17.3157	1.32e-50	1.08e-49	104.101
LINC00478	-1.00723	3.50681	-17.3465	9.69e-51	7.96e-50	104.407
SOD3	-1.29368	6.43772	-17.3538	9.01e-51	7.43e-50	104.479
JAM2	-2.21485	6.34273	-17.3647	8.08e-51	6.68e-50	104.588
CENPM	1.32771	7.18562	17.3899	6.29e-51	5.22e-50	104.838
NEIL3	1.56994	5.27244	17.3902	6.27e-51	5.22e-50	104.841
TFDP1	1.02618	7.75152	17.4259	4.39e-51	3.68e-50	105.196
PMAIP1	2.04702	7.24635	17.4384	3.88e-51	3.26e-50	105.32
CDT1	1.38924	6.0462	17.4395	3.84e-51	3.23e-50	105.331
ACTN2	-1.08601	3.84065	-17.4468	3.57e-51	3.01e-50	105.403
TACC3	1.14543	6.61731	17.4552	3.28e-51	2.77e-50	105.487
TBC1D31	1.11165	5.67432	17.4577	3.2e-51	2.7e-50	105.513
EXO1	1.66226	6.22581	17.4637	3.01e-51	2.55e-50	105.572
TREM1	2.82832	6.00135	17.4688	2.86e-51	2.43e-50	105.623
FBXL13	-1.23609	3.69397	-17.4716	2.79e-51	2.37e-50	105.65
FOXP2	-1.01728	4.021	-17.4793	2.58e-51	2.2e-50	105.727
DPP3	1.02104	8.3027	17.4808	2.54e-51	2.17e-50	105.742
LOC101928173	1.21757	5.2805	17.4942	2.22e-51	1.9e-50	105.876
ETNPPL	-2.54667	3.61285	-17.5089	1.92e-51	1.65e-50	106.022
PTCHD1	-1.98	3.68964	-17.5088	1.92e-51	1.65e-50	106.021
RNF150	-1.95827	4.90693	-17.5116	1.87e-51	1.61e-50	106.049
PDGFD	-1.54652	6.18445	-17.523	1.67e-51	1.44e-50	106.161
HELLS	1.28906	5.63487	17.5294	1.57e-51	1.35e-50	106.225
MRPS17	1.06987	8.71391	17.5577	1.18e-51	1.02e-50	106.507
SYNPO2	-2.71379	6.91601	-17.5781	9.63e-52	8.38e-51	106.71
NDC1	1.38047	8.36688	17.621	6.28e-52	5.48e-51	107.137
C1orf112	1.41595	5.95224	17.6347	5.47e-52	4.79e-51	107.274
MORN5	-2.3177	4.56636	-17.6352	5.45e-52	4.77e-51	107.279
MIR143HG	-1.86928	5.31806	-17.6442	4.98e-52	4.37e-51	107.368
SYNM	-3.63305	8.49296	-17.6442	4.98e-52	4.37e-51	107.369
PRKAA2	-1.57311	4.36921	-17.6486	4.76e-52	4.21e-51	107.413
MKI67	1.51814	6.76061	17.6598	4.26e-52	3.77e-51	107.524
NDC80	1.67065	7.82642	17.662	4.17e-52	3.69e-51	107.546
GFRA1	-1.28654	4.70198	-17.6648	4.06e-52	3.6e-51	107.573
ASPM	1.90465	6.30345	17.6683	3.91e-52	3.48e-51	107.609
SH3GL2	-2.02963	3.67917	-17.6756	3.64e-52	3.24e-51	107.682
SETBP1	-2.22037	6.15556	-17.7007	2.83e-52	2.55e-51	107.931
TSLP	-1.54793	3.76262	-17.7031	2.77e-52	2.49e-51	107.955
TTLL7	-1.7461	5.01719	-17.7157	2.44e-52	2.2e-51	108.081
RBM28	1.0574	7.97504	17.7263	2.19e-52	1.99e-51	108.187
DEPDC1	1.96201	6.13393	17.7323	2.07e-52	1.87e-51	108.246
LINC00672	-1.24895	4.67408	-17.7332	2.05e-52	1.86e-51	108.255
DLGAP5	2.4678	8.00691	17.74	1.91e-52	1.74e-51	108.322
LDOC1	-1.51075	6.37354	-17.7496	1.74e-52	1.59e-51	108.418
B3GAT1	-1.10874	5.28173	-17.7833	1.24e-52	1.13e-51	108.755
FMO6P	-1.02313	3.78097	-17.7932	1.12e-52	1.03e-51	108.853
FHL1	-2.79559	7.7056	-17.8037	1.01e-52	9.28e-52	108.958
PCAT18	-1.32697	3.52698	-17.8074	9.76e-53	8.96e-52	108.994
MCM3	1.14087	9.06369	17.8115	9.37e-53	8.62e-52	109.035
MZT1	1.26558	7.11356	17.8197	8.62e-53	7.95e-52	109.118
UBE2S	1.58331	8.2619	17.8381	7.18e-53	6.64e-52	109.301
BMPER	-1.53896	3.39298	-17.9164	3.28e-53	3.06e-52	110.082
NUDCD1	1.22168	7.24672	17.9416	2.55e-53	2.39e-52	110.333
TOP2A	1.74219	7.18989	17.961	2.1e-53	1.98e-52	110.527
CDC6	2.22411	6.40276	17.9621	2.08e-53	1.96e-52	110.538
UBE2T	1.79796	8.41672	17.9645	2.03e-53	1.92e-52	110.562
UNG	1.08204	8.3262	18.0092	1.3e-53	1.23e-52	111.008
FAM64A	1.40754	6.66028	18.0102	1.28e-53	1.22e-52	111.018
UHRF1	2.13802	8.48392	18.0333	1.02e-53	9.76e-53	111.249
WDHD1	1.42625	5.09557	18.0415	9.39e-54	9.01e-53	111.33
LOC100507557	-1.66375	3.97905	-18.0797	6.41e-54	6.17e-53	111.712
DCLK1	-2.10092	4.64812	-18.0865	5.98e-54	5.77e-53	111.78
SKA3	1.43009	6.8809	18.1042	5.01e-54	4.85e-53	111.957
SCN4B	-1.94608	4.78135	-18.127	3.99e-54	3.87e-53	112.184
GPRASP1	-2.57416	5.76348	-18.1333	3.74e-54	3.64e-53	112.248
MAD2L1	1.83453	7.53425	18.1339	3.72e-54	3.63e-53	112.253
OIP5	2.13861	7.54168	18.1614	2.83e-54	2.76e-53	112.528
BLM	1.68087	6.78177	18.2117	1.71e-54	1.67e-53	113.031
AHCY	1.18971	10.1749	18.2408	1.28e-54	1.26e-53	113.321
BRIP1	1.41547	5.30912	18.253	1.13e-54	1.12e-53	113.443
CHRDL1	-3.44124	6.15119	-18.2571	1.08e-54	1.07e-53	113.485
CENPN	1.09561	6.16612	18.2749	9.07e-55	9.01e-54	113.663
NR2F1-AS1	-1.55596	4.39141	-18.2863	8.09e-55	8.07e-54	113.776
PAK1IP1	1.0087	8.08429	18.2902	7.78e-55	7.77e-54	113.816
CDCA8	1.63159	7.52213	18.321	5.71e-55	5.74e-54	114.124
PDILT	-2.44855	4.16798	-18.3263	5.42e-55	5.45e-54	114.177
AUNIP	1.48443	5.60262	18.3332	5.05e-55	5.11e-54	114.246
SRPX	-2.78323	7.32467	-18.3705	3.48e-55	3.54e-54	114.619
HLF	-2.30138	4.81513	-18.3764	3.28e-55	3.34e-54	114.678
BAI3	-1.04203	3.02268	-18.4016	2.55e-55	2.6e-54	114.93
PRR7	1.05889	5.40288	18.4163	2.2e-55	2.25e-54	115.077
POLR1C	1.1485	7.80755	18.4387	1.76e-55	1.81e-54	115.301
MYBL2	1.27684	6.98633	18.4444	1.66e-55	1.71e-54	115.358
SMTN	-1.50279	5.71931	-18.4524	1.53e-55	1.59e-54	115.438
KCNMB1	-1.44797	4.69144	-18.459	1.43e-55	1.49e-54	115.504
CKS1B	1.50299	9.91617	18.4604	1.41e-55	1.47e-54	115.518
PODN	-1.04504	5.36004	-18.4851	1.1e-55	1.15e-54	115.765
TMOD1	-1.54727	6.0712	-18.5221	7.61e-56	7.96e-55	116.135
IGFBP6	-1.97227	7.41948	-18.5414	6.27e-56	6.57e-55	116.329
MCM4	1.24172	6.65632	18.5522	5.63e-56	5.91e-55	116.437
MFAP5	-3.00198	6.44615	-18.5828	4.14e-56	4.36e-55	116.743
FBP2	-2.41362	5.43915	-18.6045	3.33e-56	3.51e-55	116.961
SNRPD1	1.11882	9.19625	18.6059	3.28e-56	3.48e-55	116.974
MYLK	-1.74225	6.50091	-18.639	2.35e-56	2.51e-55	117.306
KIF23	1.52064	5.33264	18.6638	1.84e-56	1.96e-55	117.554
SORBS1	-1.26845	6.64323	-18.7517	7.6e-57	8.23e-56	118.435
STMN2	-2.62642	4.99515	-18.7735	6.1e-57	6.67e-56	118.653
CENPF	1.29228	5.60613	18.7841	5.49e-57	6.04e-56	118.759
ITGA7	-1.53717	5.2236	-18.7921	5.07e-57	5.59e-56	118.839
CCNA2	2.07704	7.62464	18.8023	4.57e-57	5.05e-56	118.942
PLK4	1.15819	5.10599	18.8116	4.16e-57	4.61e-56	119.035
CPOX	1.0429	8.18369	18.8141	4.06e-57	4.5e-56	119.06
PPP1R3C	-1.88522	5.2965	-18.8255	3.62e-57	4.04e-56	119.174
INHBA	2.12793	6.3024	18.8395	3.15e-57	3.51e-56	119.314
ANLN	2.25972	8.21631	18.8489	2.86e-57	3.21e-56	119.409
MND1	2.07032	6.33895	18.8672	2.38e-57	2.68e-56	119.591
MICU3	-2.25834	4.3545	-18.8715	2.28e-57	2.57e-56	119.635
RYR3	-2.07931	3.65785	-18.8822	2.05e-57	2.31e-56	119.742
RYR2	-1.63099	3.8983	-18.886	1.97e-57	2.24e-56	119.78
ASF1B	1.23956	6.80469	18.9083	1.58e-57	1.8e-56	120.004
CHEK2	1.27443	7.08619	18.9254	1.33e-57	1.52e-56	120.176
HSPB8	-2.04319	6.35026	-18.9535	1e-57	1.15e-56	120.457
MCM2	1.61934	7.95606	18.9592	9.46e-58	1.08e-56	120.514
AQP4	-1.5626	3.25805	-18.9652	8.9e-58	1.02e-56	120.574
F13A1	-2.60122	7.20773	-18.9863	7.2e-58	8.31e-57	120.786
OGN	-4.57243	5.86352	-19.0151	5.39e-58	6.26e-57	121.074
BIRC5 /// EPR-1	1.51949	6.38593	19.0218	5.04e-58	5.86e-57	121.142
ITIH5	-2.04292	6.19645	-19.0401	4.2e-58	4.91e-57	121.325
C1QTNF7	-2.5159	4.73279	-19.0663	3.22e-58	3.79e-57	121.588
HJURP	1.92131	7.00762	19.0834	2.71e-58	3.2e-57	121.76
NEGR1	-1.92209	4.70617	-19.0837	2.71e-58	3.2e-57	121.762
PRC1	2.00294	8.79469	19.118	1.92e-58	2.28e-57	122.106
CDC20	2.25247	8.36467	19.1204	1.87e-58	2.23e-57	122.131
DDX39A	1.20044	9.45157	19.1587	1.27e-58	1.52e-57	122.515
PTBP3	1.17025	7.5268	19.1597	1.26e-58	1.51e-57	122.525
SLC52A2	1.21993	7.12925	19.1604	1.25e-58	1.5e-57	122.532
PUS7	1.31742	8.52653	19.1863	9.65e-59	1.16e-57	122.792
TRIP13	2.05177	7.43777	19.1919	9.13e-59	1.1e-57	122.847
PIGW	1.29002	6.93009	19.1996	8.45e-59	1.02e-57	122.925
CDK1	2.09695	7.91312	19.2253	6.53e-59	7.93e-58	123.182
FRRS1L	-1.27056	3.98713	-19.2314	6.14e-59	7.47e-58	123.244
RBM24	-2.67141	4.71376	-19.2365	5.83e-59	7.11e-58	123.295
ZWILCH	1.62287	7.77811	19.2541	4.88e-59	5.98e-58	123.472
FOXM1	1.92793	6.98411	19.2577	4.71e-59	5.78e-58	123.507
MASTL	1.46877	6.97085	19.2602	4.59e-59	5.65e-58	123.533
ZNF385D	-1.0795	4.03767	-19.2638	4.43e-59	5.46e-58	123.569
KIF4A	2.01851	7.37203	19.2946	3.25e-59	4.05e-58	123.878
PNPT1	1.23697	9.38566	19.3075	2.86e-59	3.56e-58	124.007
CTPS1	1.23648	7.60327	19.3221	2.47e-59	3.09e-58	124.153
PTTG1	1.83613	9.88223	19.3395	2.07e-59	2.61e-58	124.328
ANK2	-1.11991	4.1683	-19.4075	1.05e-59	1.33e-58	125.01
C16orf89	-2.98736	6.30011	-19.4138	9.81e-60	1.25e-58	125.074
HAND2-AS1	-3.13052	4.50306	-19.448	6.95e-60	8.87e-59	125.417
TOX	-1.94858	6.11621	-19.4766	5.22e-60	6.67e-59	125.704
TMEM178A	-2.23967	4.74516	-19.4885	4.63e-60	5.93e-59	125.824
TDRP	-1.32037	4.58279	-19.5009	4.09e-60	5.26e-59	125.948
FAM19A4	-3.5509	3.84702	-19.5179	3.44e-60	4.46e-59	126.119
BHMT2	-1.50918	4.13082	-19.5217	3.32e-60	4.3e-59	126.156
DSN1	1.31373	6.95206	19.5536	2.4e-60	3.14e-59	126.477
ADRM1	1.01774	8.29922	19.6004	1.5e-60	1.98e-59	126.946
GTPBP4	1.02732	7.91598	19.617	1.27e-60	1.68e-59	127.113
HEATR2	1.05221	6.94118	19.6534	8.81e-61	1.17e-59	127.479
NCAPD2	1.44008	7.01195	19.6538	8.78e-61	1.17e-59	127.482
CTNNA3	-1.57413	3.45998	-19.6551	8.67e-61	1.15e-59	127.495
KCNT2	-1.4232	3.8013	-19.665	7.85e-61	1.05e-59	127.595
ECT2	1.38833	6.20244	19.6656	7.8e-61	1.04e-59	127.601
PCNA	1.34186	10.8571	19.6784	6.85e-61	9.2e-60	127.73
TMEM100	-3.52232	6.81422	-19.6997	5.53e-61	7.49e-60	127.944
RAD51AP1	1.98248	8.84669	19.7073	5.13e-61	6.95e-60	128.02
GINS1	2.21199	8.49079	19.7255	4.27e-61	5.81e-60	128.202
WDR34	1.32264	7.86501	19.7377	3.77e-61	5.15e-60	128.325
PHOX2B	-1.00255	4.39814	-19.7677	2.79e-61	3.84e-60	128.626
FAM83H	1.07191	5.88773	19.7845	2.36e-61	3.25e-60	128.795
MGARP	-1.27352	4.50058	-19.8423	1.32e-61	1.82e-60	129.374
KCNN3	-1.25672	4.81233	-19.8459	1.27e-61	1.76e-60	129.411
PRPF4	1.02053	7.89368	19.8706	9.92e-62	1.38e-60	129.659
XPO4	1.07013	6.716	19.9228	5.87e-62	8.22e-61	130.183
PARPBP	1.39993	4.77833	19.931	5.4e-62	7.59e-61	130.265
PMP2	-1.29657	3.08331	-19.9498	4.47e-62	6.3e-61	130.454
CENPA	1.33695	6.73518	19.9551	4.24e-62	5.99e-61	130.507
SSBP2	-1.72293	4.92927	-19.9814	3.25e-62	4.64e-61	130.772
CARTPT	-2.15547	5.64933	-20.0111	2.41e-62	3.49e-61	131.07
LDB3	-1.27058	5.29857	-20.0346	1.91e-62	2.79e-61	131.305
MTFR2	1.42176	5.35187	20.0372	1.86e-62	2.72e-61	131.331
C5orf34	1.64501	6.21317	20.0725	1.3e-62	1.91e-61	131.686
PDZRN4	-3.93591	4.64097	-20.0731	1.29e-62	1.91e-61	131.692
ZNF300P1	-1.74433	4.26154	-20.0821	1.18e-62	1.75e-61	131.783
FGF10	-1.10801	3.78823	-20.0896	1.1e-62	1.64e-61	131.857
KCNA5	-1.6468	4.5649	-20.1069	9.21e-63	1.38e-61	132.032
NCAPH	2.05971	6.75168	20.1229	7.84e-63	1.18e-61	132.192
AGTR1	-2.67784	4.27215	-20.1641	5.18e-63	7.84e-62	132.606
SEMA3G	-1.62749	5.21826	-20.1889	4.04e-63	6.13e-62	132.854
ADAMTSL3	-1.39414	5.296	-20.1912	3.94e-63	6e-62	132.878
MTHFD2	1.25828	7.57074	20.269	1.8e-63	2.76e-62	133.659
NAT10	1.17721	7.78324	20.2954	1.38e-63	2.12e-62	133.924
KIF2C	1.8331	7.06381	20.3065	1.24e-63	1.9e-62	134.036
CSE1L	1.11395	8.61342	20.3133	1.16e-63	1.78e-62	134.103
SGCG	-1.69572	3.67511	-20.3225	1.05e-63	1.63e-62	134.196
NEFL	-1.58055	3.5454	-20.3499	7.99e-64	1.24e-62	134.471
CDCA2	1.87113	6.28764	20.4151	4.15e-64	6.51e-63	135.126
DDX21	1.12339	10.5018	20.4989	1.79e-64	2.85e-63	135.967
ESRRG	-3.8058	6.03067	-20.499	1.79e-64	2.85e-63	135.967
MYH11	-2.79241	6.72381	-20.5062	1.66e-64	2.66e-63	136.04
LONRF2	-2.44233	4.57711	-20.5558	1.01e-64	1.63e-63	136.538
STARD9	-1.44548	5.41229	-20.5746	8.35e-65	1.36e-63	136.726
VIP	-4.02845	4.30857	-20.5755	8.27e-65	1.35e-63	136.735
RSPO2	-2.54858	3.69055	-20.5886	7.25e-65	1.18e-63	136.867
NCAPG2	1.62766	7.68586	20.5945	6.83e-65	1.12e-63	136.926
PLN	-4.06124	6.55145	-20.6022	6.33e-65	1.04e-63	137.003
FAT3	-1.504	3.53151	-20.6333	4.63e-65	7.63e-64	137.316
NUF2	2.5233	7.4689	20.6522	3.83e-65	6.35e-64	137.505
XKR4	-1.51162	3.4807	-20.7	2.37e-65	3.95e-64	137.985
MARCKSL1	1.53127	10.9488	20.7149	2.04e-65	3.41e-64	138.135
CNTN1	-1.8004	3.81541	-20.7363	1.64e-65	2.77e-64	138.349
NOLC1	1.1102	8.10557	20.7485	1.45e-65	2.47e-64	138.472
HDGF	1.04068	10.6558	20.7914	9.44e-66	1.63e-64	138.902
TPX2	2.52393	7.59592	20.794	9.2e-66	1.59e-64	138.928
ZNF367	1.86514	7.67782	20.8618	4.66e-66	8.13e-65	139.608
SCNN1B	-1.19936	4.34912	-20.8871	3.61e-66	6.37e-65	139.862
PGM5	-1.6232	4.70526	-20.9082	2.92e-66	5.17e-65	140.074
EZH2	2.20289	7.23585	20.9371	2.18e-66	3.92e-65	140.364
DBF4	1.60406	8.78497	20.9407	2.11e-66	3.79e-65	140.399
LOC100507311	-1.30146	3.63856	-21.0033	1.12e-66	2.04e-65	141.028
ZNF677	-1.16974	4.06498	-21.0099	1.05e-66	1.92e-65	141.093
RUVBL1	1.37476	8.20708	21.0647	6.06e-67	1.12e-65	141.643
NCAM1	-1.09041	4.58755	-21.0909	4.66e-67	8.63e-66	141.906
FBXL22	-1.76946	4.33764	-21.186	1.79e-67	3.35e-66	142.859
ABCA9	-1.06201	3.48218	-21.2204	1.27e-67	2.39e-66	143.204
MMRN1	-2.82031	4.9239	-21.2257	1.2e-67	2.27e-66	143.257
HMGB3P1	1.56108	6.55785	21.2514	9.3e-68	1.77e-66	143.514
SPC25	2.50416	6.42294	21.2513	9.31e-68	1.77e-66	143.514
LOC100996255	-1.0924	5.9821	-21.2672	7.93e-68	1.53e-66	143.674
ODF2	1.01328	6.25758	21.3248	4.45e-68	8.65e-67	144.251
CEP55	2.64942	8.54644	21.3259	4.4e-68	8.59e-67	144.262
ACPT	-1.21941	5.50249	-21.3799	2.56e-68	5.03e-67	144.802
TRIM50	-1.30737	4.30439	-21.4374	1.44e-68	2.86e-67	145.378
RAD51	1.29386	5.44935	21.4763	9.73e-69	1.94e-67	145.769
PSMC4	1.07771	9.07577	21.4997	7.7e-69	1.54e-67	146.002
CPEB1	-1.09645	4.26914	-21.5026	7.47e-69	1.5e-67	146.032
BARX1	-2.4582	5.28602	-21.5286	5.76e-69	1.16e-67	146.292
ABI3BP	-1.84124	4.60692	-21.5412	5.08e-69	1.03e-67	146.418
ERCC6L	1.63649	6.4902	21.5709	3.77e-69	7.71e-68	146.716
PGM5-AS1	-3.01586	5.51169	-21.6029	2.73e-69	5.61e-68	147.036
LINC01082	-1.93014	5.10655	-21.6067	2.63e-69	5.45e-68	147.074
PHYHD1	-1.21536	5.67032	-21.6117	2.5e-69	5.21e-68	147.124
SLC25A39	1.18361	7.48014	21.6987	1.05e-69	2.22e-68	147.995
PRIMA1	-3.14067	6.08298	-21.7081	9.52e-70	2.03e-68	148.089
DCTPP1	1.09651	9.56248	21.7196	8.48e-70	1.82e-68	148.204
HIST1H2AJ	1.04185	6.88026	21.7381	7.05e-70	1.53e-68	148.389
PSMA7	1.03889	10.2807	21.7372	7.11e-70	1.53e-68	148.381
NFE2L3	2.21201	7.22351	21.7434	6.68e-70	1.45e-68	148.442
BID	1.42685	8.15434	21.7503	6.23e-70	1.36e-68	148.511
MIF	1.05902	11.9699	21.7827	4.51e-70	9.9e-69	148.835
EIF6	1.30371	9.81472	21.7896	4.21e-70	9.27e-69	148.904
PPP1R14B	1.12433	8.82097	21.8138	3.3e-70	7.31e-69	149.147
AURKB	1.15049	5.0265	21.8177	3.17e-70	7.06e-69	149.185
SLITRK5	-1.50735	3.4381	-21.8196	3.11e-70	6.96e-69	149.205
CDKL2	-1.26826	3.82314	-21.8245	2.97e-70	6.65e-69	149.253
ATIC	1.04599	9.91167	21.8313	2.77e-70	6.24e-69	149.321
E2F7	1.41907	5.34183	21.8415	2.5e-70	5.69e-69	149.423
DPP6	-1.49521	4.34911	-21.8504	2.29e-70	5.22e-69	149.512
DIXDC1	-1.08632	5.92376	-21.8655	1.97e-70	4.53e-69	149.664
PIRT	-1.18197	3.82331	-21.8731	1.82e-70	4.22e-69	149.74
ATP4B	-2.39476	5.25361	-21.9716	6.79e-71	1.59e-69	150.725
GGCT	1.17088	10.97	21.973	6.7e-71	1.58e-69	150.739
DEPDC1B	2.53567	7.07055	22.0114	4.56e-71	1.08e-69	151.122
MAGEE1	-1.051	5.24851	-22.0124	4.52e-71	1.07e-69	151.132
ADH1B	-3.02948	5.36915	-22.0222	4.09e-71	9.78e-70	151.231
GSTM5	-1.30503	5.60958	-22.0305	3.77e-71	9.05e-70	151.313
PPP1R1A	-2.22482	4.70023	-22.1106	1.69e-71	4.08e-70	152.114
NPR3	-1.03363	4.04643	-22.1367	1.3e-71	3.17e-70	152.375
FANCI	1.82329	6.82711	22.1559	1.07e-71	2.63e-70	152.566
LOC101926959	-1.88947	3.55636	-22.2325	4.99e-72	1.23e-70	153.332
CASQ2	-3.72901	5.70375	-22.2381	4.72e-72	1.17e-70	153.387
PNO1	1.02146	7.56836	22.2388	4.69e-72	1.16e-70	153.394
STIL	2.18586	7.52371	22.2389	4.68e-72	1.16e-70	153.395
PAXIP1	1.17803	8.00908	22.2559	3.95e-72	9.9e-71	153.565
SMC4	1.27167	7.69371	22.2655	3.59e-72	9.04e-71	153.661
CCDC86	1.27153	7.70387	22.2712	3.39e-72	8.58e-71	153.718
CBX7	-1.87353	7.86312	-22.2922	2.75e-72	6.99e-71	153.927
E2F3	1.04095	7.22849	22.3078	2.35e-72	6.01e-71	154.083
KIF15	2.34954	6.75947	22.3295	1.89e-72	4.86e-71	154.3
PLAC9	-1.41971	5.53021	-22.3377	1.74e-72	4.51e-71	154.381
CCNF	1.03742	5.68275	22.3663	1.31e-72	3.42e-71	154.667
HSPB7	-1.39353	4.76154	-22.4037	9.01e-73	2.36e-71	155.04
UBXN10-AS1	-1.87406	6.03041	-22.454	5.45e-73	1.45e-71	155.542
ZNF536	-1.23528	3.91616	-22.455	5.4e-73	1.45e-71	155.552
UBE2C	2.6542	9.36473	22.5069	3.22e-73	8.75e-72	156.069
KIAA1524	1.63072	4.69803	22.5582	1.93e-73	5.3e-72	156.581
SCNN1G	-1.31511	3.48634	-22.5639	1.82e-73	5.03e-72	156.638
ORC6	1.6593	7.9387	22.6135	1.11e-73	3.1e-72	157.132
GRP	-3.46608	4.1905	-22.6402	8.49e-74	2.39e-72	157.399
KIF14	2.39859	6.31004	22.643	8.26e-74	2.33e-72	157.426
EPHA7	-2.58044	4.05234	-22.6617	6.85e-74	1.95e-72	157.613
PWAR6	-2.64586	4.3905	-22.6727	6.14e-74	1.77e-72	157.722
SASS6	1.09653	6.60022	22.7383	3.19e-74	9.33e-73	158.375
PCDH9	-1.81458	3.7955	-22.751	2.81e-74	8.27e-73	158.502
ZNF471	-1.00974	3.26734	-22.7636	2.48e-74	7.38e-73	158.627
TEAD4	1.4821	6.6129	22.8014	1.7e-74	5.09e-73	159.004
CDO1	-1.55365	4.18377	-22.8101	1.56e-74	4.69e-73	159.091
KPNA2	1.63286	10.6732	22.8877	7.2e-75	2.18e-73	159.862
ADRB2	-2.13299	6.09174	-22.9113	5.69e-75	1.73e-73	160.097
ATAD2	1.90143	7.33253	22.9121	5.65e-75	1.73e-73	160.105
CENPL	1.71082	6.38035	22.9302	4.71e-75	1.45e-73	160.285
UBE2QL1	-1.95302	4.87636	-22.9652	3.32e-75	1.03e-73	160.634
ZNF385B	-2.10303	4.02255	-22.9708	3.14e-75	9.81e-74	160.69
LOC100507073	-2.1265	3.7752	-22.9877	2.66e-75	8.34e-74	160.858
ZMYND19	1.3295	7.98767	22.9877	2.66e-75	8.34e-74	160.857
ALYREF	1.3146	9.75069	22.9979	2.4e-75	7.63e-74	160.959
GREM2	-2.15099	3.96372	-22.9992	2.37e-75	7.58e-74	160.972
NUP85	1.05076	8.86704	23.0169	1.99e-75	6.39e-74	161.148
SKA1	2.13448	4.91039	23.1303	6.43e-76	2.08e-74	162.275
GTSE1	1.14205	6.08422	23.1594	4.81e-76	1.58e-74	162.565
PRIM2	1.53356	5.97082	23.1688	4.38e-76	1.45e-74	162.657
PLA2G5	-1.10295	3.66157	-23.2192	2.65e-76	8.81e-75	163.158
CLDN7	3.40352	9.16075	23.2386	2.19e-76	7.32e-75	163.351
SNRPB	1.41148	9.85658	23.2599	1.77e-76	5.96e-75	163.563
LRP8	2.41339	6.00376	23.2791	1.46e-76	4.95e-75	163.753
DTL	2.43478	7.04997	23.3745	5.67e-77	1.93e-75	164.7
SMYD1	-1.86939	4.66678	-23.4014	4.34e-77	1.49e-75	164.967
RNF180	-1.76509	3.65013	-23.4152	3.78e-77	1.31e-75	165.103
HSPB6	-1.69985	3.9163	-23.4184	3.66e-77	1.27e-75	165.135
SNRPF	1.19639	10.214	23.4393	2.98e-77	1.04e-75	165.343
RNASEH2A	1.7033	8.03176	23.4472	2.75e-77	9.71e-76	165.421
C2orf40	-5.73677	6.46484	-23.4615	2.39e-77	8.48e-76	165.563
PUF60	1.20266	9.09348	23.4948	1.72e-77	6.18e-76	165.893
NAP1L2	-2.8953	4.41829	-23.5092	1.49e-77	5.4e-76	166.035
LINC00982	-1.61471	4.76235	-23.5478	1.01e-77	3.71e-76	166.418
AURKA	1.93498	7.34081	23.5717	8e-78	2.94e-76	166.654
SCN7A	-2.90646	3.95345	-23.5805	7.33e-78	2.72e-76	166.742
PRELP	-1.86299	5.82443	-23.6671	3.11e-78	1.16e-76	167.599
PSMB3	1.01245	11.0575	23.6681	3.07e-78	1.16e-76	167.61
CKS2	2.2413	10.6489	23.6757	2.85e-78	1.08e-76	167.685
MAL	-2.47452	5.88281	-23.6763	2.83e-78	1.08e-76	167.691
LOC100506388	-1.41687	4.05501	-23.7379	1.54e-78	5.92e-77	168.301
CCDC138	1.30758	5.502	23.7402	1.5e-78	5.83e-77	168.323
MCM10	2.19967	5.86639	23.7828	9.86e-79	3.85e-77	168.745
PLIN4	-1.32898	5.19675	-23.8066	7.79e-79	3.07e-77	168.98
TMEM35	-3.56491	4.84347	-23.8472	5.21e-79	2.07e-77	169.382
NME1	1.55016	10.8828	23.866	4.33e-79	1.73e-77	169.567
DDIAS	2.22595	6.86515	23.8724	4.06e-79	1.65e-77	169.631
PTTG3P	1.76389	6.3734	23.8908	3.38e-79	1.38e-77	169.813
NEK2	2.77378	6.76238	23.9049	2.94e-79	1.21e-77	169.952
ANGPTL1	-3.68708	4.59321	-23.9308	2.28e-79	9.47e-78	170.209
SNAP91	-1.49008	3.52916	-24.1597	2.37e-80	1.01e-78	172.468
HSPE1	1.34173	10.7145	24.255	9.24e-81	4.11e-79	173.408
ABCA6	-2.22889	4.284	-24.2785	7.33e-81	3.29e-79	173.639
LGI1	-2.34708	3.45358	-24.4242	1.74e-81	7.88e-80	175.075
RBPMS2	-3.22099	6.70207	-24.4566	1.26e-81	5.78e-80	175.394
C7	-3.4838	5.74138	-24.5051	7.84e-82	3.61e-80	175.872
LRRN4CL	-2.59441	5.92856	-24.5079	7.63e-82	3.55e-80	175.899
GPER1	-1.26701	4.93381	-24.5705	4.12e-82	1.95e-80	176.515
YDJC	1.33335	7.38426	24.6123	2.73e-82	1.3e-80	176.926
GPM6A	-1.94551	4.19339	-24.6228	2.46e-82	1.19e-80	177.028
PTGER3	-1.2802	4.12381	-24.6536	1.82e-82	8.86e-81	177.331
RELN	-2.02737	5.27964	-24.6573	1.75e-82	8.62e-81	177.368
SLC5A7	-1.33598	3.45399	-24.7058	1.09e-82	5.4e-81	177.844
DNMT1	1.36764	8.85121	24.8714	2.13e-83	1.07e-81	179.47
CNKSR2	-1.32871	3.39734	-24.885	1.87e-83	9.46e-82	179.603
NRXN1	-1.01179	3.55841	-24.9351	1.14e-83	5.9e-82	180.094
NR2F2-AS1	-1.2034	4.40474	-25.0408	4.05e-84	2.11e-82	181.13
LIMS2	-2.12771	6.17363	-25.0849	2.63e-84	1.39e-82	181.561
CDH19	-2.2548	3.92864	-25.1125	2e-84	1.07e-82	181.832
PGR	-1.52673	3.93221	-25.1698	1.14e-84	6.22e-83	182.392
CD3EAP	1.40723	6.84914	25.2151	7.34e-85	4.03e-83	182.836
NPTX1	-2.27155	5.42719	-25.2694	4.31e-85	2.4e-83	183.366
SCUBE2	-2.25651	5.1792	-25.2874	3.61e-85	2.05e-83	183.542
SLC25A4	-1.46805	6.52371	-25.4103	1.09e-85	6.25e-84	184.742
PART1	-1.71837	4.47321	-25.4189	9.99e-86	5.81e-84	184.826
LOC100128108	-1.07455	3.48832	-25.4625	6.52e-86	3.84e-84	185.252
MYOT	-3.06441	3.93023	-25.4669	6.25e-86	3.72e-84	185.295
SCARA5	-2.05552	5.59726	-25.4791	5.55e-86	3.34e-84	185.414
HMGB3	1.9665	8.03816	25.4832	5.33e-86	3.25e-84	185.454
FAM107A	-1.46483	6.24201	-25.6721	8.44e-87	5.2e-85	187.294
GHR	-3.57079	5.13258	-25.7659	3.38e-87	2.11e-85	188.207
ZNF626	-1.14802	5.0392	-25.8811	1.1e-87	6.95e-86	189.328
BEND5	-1.36675	4.06645	-25.8915	9.95e-88	6.36e-86	189.429
ARHGAP20	-1.13615	4.84671	-25.9393	6.25e-88	4.05e-86	189.893
NIPSNAP3B	-2.07301	3.83495	-25.995	3.64e-88	2.38e-86	190.434
ADAM17	1.06839	7.03111	26.123	1.05e-88	6.97e-87	191.676
CCKBR	-1.4198	4.51791	-26.1333	9.49e-89	6.38e-87	191.776
GLA	1.4621	8.57728	26.1501	8.06e-89	5.5e-87	191.939
AR	-1.34415	4.40749	-26.2399	3.37e-89	2.38e-87	192.808
GPR146	-1.06222	3.93664	-26.332	1.38e-89	9.95e-88	193.7
ASPA	-1.66742	4.72977	-26.3803	8.65e-90	6.32e-88	194.167
MAMDC2	-4.76283	5.53686	-26.5481	1.71e-90	1.3e-88	195.788
RRP9	1.1107	5.69397	26.5954	1.08e-90	8.37e-89	196.245
ZBTB16	-2.48517	4.51651	-26.6267	7.98e-91	6.28e-89	196.547
HOXB9	1.57989	5.24548	26.7369	2.76e-91	2.2e-89	197.608
C1QTNF3	-1.38004	5.14604	-26.8144	1.31e-91	1.06e-89	198.355
ORC1	1.90098	5.06678	26.8383	1.04e-91	8.55e-90	198.585
SIGLEC11	-2.06036	4.16292	-26.9037	5.52e-92	4.63e-90	199.214
TCEAL2	-4.4907	4.90135	-27.009	2e-92	1.71e-90	200.226
ACADL	-1.51956	3.61552	-27.0664	1.15e-92	1e-90	200.777
GNG7	-1.06263	5.52418	-27.1725	4.16e-93	3.73e-91	201.795
ZFP2	-1.50995	3.78471	-27.1792	3.91e-93	3.57e-91	201.859
SFRP1	-2.0188	4.95774	-27.2552	1.88e-93	1.78e-91	202.588
ATP1A2	-3.53161	4.61802	-27.3339	8.85e-94	8.54e-92	203.341
ZCCHC18	-1.14642	4.6815	-27.3747	5.99e-94	6.01e-92	203.731
LINC01354	-1.08891	2.9539	-27.4434	3.1e-94	3.24e-92	204.389
HIST1H1D	1.08064	5.0028	27.5481	1.14e-94	1.21e-92	205.389
LOC100506834	-1.50365	3.66951	-27.5661	9.59e-95	1.04e-92	205.56
ADPGK	1.11889	7.56146	27.6706	3.53e-95	3.94e-93	206.557
PLP1	-4.01113	4.32019	-27.6702	3.54e-95	3.94e-93	206.555
ZNF546	-1.11761	3.82378	-27.6854	3.07e-95	3.56e-93	206.699
HMP19	-1.80711	3.99898	-28.2218	1.86e-97	2.21e-95	211.797
HOXA2	-2.06846	4.60709	-28.2615	1.28e-97	1.55e-95	212.173
WDFY3-AS2	-1.34521	3.80351	-28.3303	6.64e-98	8.28e-96	212.825
PRRT2	-1.37497	4.68028	-28.452	2.1e-98	2.68e-96	213.975
DUSP26	-1.09154	5.69446	-28.5528	8.09e-99	1.06e-96	214.927
RCC2	1.46831	9.85164	28.9177	2.59e-100	3.68e-98	218.363
KCNB1	-1.46223	4.04413	-29.0648	6.49e-101	9.49e-99	219.744
SGCA	-1.8442	4.47417	-29.0921	5.03e-101	7.56e-99	220
RERGL	-2.95902	4.43378	-29.2644	9.99e-102	1.55e-99	221.613
CENPO	1.12825	5.82641	29.532	8.17e-103	1.31e-100	224.113
ADHFE1	-1.68217	6.09265	-30.1788	1.99e-105	3.29e-103	230.119
ARHGAP39	1.12231	4.66251	30.3722	3.33e-106	5.68e-104	231.906
SORCS1	-1.39763	3.71879	-30.3858	2.94e-106	5.18e-104	232.031
KCNMB2	-1.46269	3.66323	-30.4585	1.5e-106	2.74e-104	232.702
KIAA2022	-1.47802	3.60847	-30.5487	6.53e-107	1.24e-104	233.532
RPRM	-2.57081	4.80756	-30.7236	1.3e-107	2.57e-105	235.14
LYVE1	-3.15309	5.06806	-30.9431	1.74e-108	3.56e-106	237.152
ZNF540	-1.31747	4.00687	-30.9847	1.19e-108	2.53e-106	237.533
ASXL3	-1.11052	4.14128	-31.4788	1.3e-110	2.89e-108	242.039
DPT	-3.93042	6.10052	-31.5867	4.88e-111	1.13e-108	243.019
CKMT2	-3.4039	5.0999	-31.6531	2.67e-111	6.82e-109	243.622
ATAD3A	1.15414	7.26451	33.3757	5.13e-118	1.38e-115	259.057
NACAD	-1.48434	5.34402	-33.5616	9.89e-119	2.81e-116	260.7
SERTM1	-1.27611	2.89493	-33.8247	9.68e-120	2.91e-117	263.02
TXLNB	-1.66241	3.63109	-35.4042	1.02e-125	3.26e-123	276.756
FABP4	-3.79629	5.38397	-36.1216	2.18e-128	7.43e-126	282.891
ADIPOQ	-4.37446	3.96227	-36.5274	6.92e-130	2.53e-127	286.333
PLCXD3	-2.79909	4.00299	-36.5664	4.97e-130	1.96e-127	286.663
MYOC	-4.53311	4.9953	-37.3533	6.58e-133	3.06e-130	293.274
C3orf18	-1.71824	5.79506	-37.389	4.89e-133	2.5e-130	293.572
RGAG4	-1.39269	5.01458	-41.1295	2.94e-146	2.15e-143	323.935
ANKRD65	-1.40395	5.25509	-41.162	2.27e-146	1.94e-143	324.191
C1orf95	-1.24272	4.86224	-48.9592	1.18e-171	1.51e-168	382.201
GRIK3	-1.25936	3.26306	-50.9013	1.64e-177	2.79e-174	395.631
